# Supplementary material
Source: PubMed Central journal article supplement (PMC3045699)
Supplement: NIHMS252868-supplement-1_si_001.pdf [file NIHMS252868-supplement-1_si_001.pdf]

# Supporting Information

## Stereospecific Cross-Coupling of Secondary Alkyl $\beta$ -Trifluoroboratoamides

*Deidre L. Sandrock,<sup>†</sup> Ludivine Jean-Gérard,<sup>†</sup> Cheng-yi Chen,<sup>‡</sup> Spencer D. Dreher,<sup>‡</sup> and Gary A. Molander<sup>\*†</sup>*

<sup>†</sup>Roy and Diana Vagelos Laboratories, Penn/Merck Laboratory for High-Throughput Experimentation, Department of Chemistry, University of Pennsylvania, 231 South 34th Street, Philadelphia, PA 19104-6323, and <sup>‡</sup>Department of Process Research and the Catalytic Reactions Discovery and Development Laboratory, Merck and Co. Inc., 126 East Lincoln Avenue, Rahway, NJ, USA 07065

### Contents:

|                                                                                                                  |    |
|------------------------------------------------------------------------------------------------------------------|----|
| General .....                                                                                                    | S3 |
| Preparation of $\alpha,\beta$ -unsaturated amide starting materials .....                                        | S3 |
| General Procedure for the Preparation of Racemic Secondary Potassium $\beta$ -Trifluoroboratoamides.....         | S5 |
| General Procedure for the Preparation of Enantioenriched Secondary Potassium $\beta$ -Trifluoroboratoamides..... | S6 |
| Compound Characterization of $\beta$ -Trifluoroboratoamides.....                                                 | S7 |
| Determination of Absolute Configuration and Enantiomeric Ratio of Enantioenriched                                |    |

|                                                                                                                   |     |
|-------------------------------------------------------------------------------------------------------------------|-----|
| Potassium $\beta$ -Trifluoroboratoamides.....                                                                     | S14 |
| Procedure for the Suzuki-Miyaura Cross-Coupling with Aryl Electrophiles .....                                     | S17 |
| Compound Characterization of Cross-Coupled Products .....                                                         | S18 |
| Determination of Absolute Configuration and Enantiomeric Ratio of Enantioenriched<br>Cross-Coupled Products ..... | S33 |
| Chromatograms.....                                                                                                | S37 |
| References and Notes .....                                                                                        | S42 |
| NMR.....                                                                                                          | S43 |

**General.** Pd(OAc)<sub>2</sub>, XPhos (2-dicyclohexylphosphino-2',4',6'-diisopropyl-1,1'-biphenyl), SPhos (2-dicyclohexylphosphino-2',6'-dimethoxybiphenyl), K<sub>2</sub>CO<sub>3</sub>, and Cs<sub>2</sub>CO<sub>3</sub> were used as received. Toluene, THF, and CPME were distilled from sodium/benzophenone prior to use. H<sub>2</sub>O was degassed prior to use. Standard benchtop techniques were employed for handling air-sensitive reagents. Melting points (°C) are uncorrected. <sup>1</sup>H, <sup>13</sup>C, and <sup>19</sup>F NMR spectra were recorded at 500.39, 125.75, and 470.55 MHz, respectively. <sup>19</sup>F NMR chemical shifts were referenced to external CFCl<sub>3</sub> (0.0 ppm). <sup>11</sup>B NMR spectra at 128.4 MHz were obtained on a spectrometer equipped with the appropriate decoupling accessories. All <sup>11</sup>B NMR chemical shifts were referenced to external BF<sub>3</sub>·OEt<sub>2</sub> (0.0 ppm) with a negative sign indicating an upfield shift. Analytical thin-layer chromatography (TLC) was performed on TLC silica gel plates (0.25 mm) precoated with a fluorescent indicator. Standard flash chromatography procedures<sup>11</sup> were followed using 32–63 μm silica gel.

**Preparation of α,β-unsaturated amide starting materials:**

α,β-Unsaturated amides were prepared according to the following procedure.<sup>2</sup> Those derived from the reaction of dimethylamine,<sup>3</sup> piperidine,<sup>4</sup> pyrrolidine,<sup>5</sup> and dibenzylamine<sup>6</sup> with crotonoyl chloride; and pyrrolidine<sup>7</sup> with cinnamoyl chloride were prepared following this procedure and were in accordance with the spectral data reported in the literature. (*E*)-*N*-Ethyl-*N*-(*o*-tolyl)but-2-enamide was available commercially.

**Procedure:** Crotonoyl chloride (1.12 g, 10.7 mmol, 1.2 equiv) was dissolved in CH<sub>2</sub>Cl<sub>2</sub> (100 mL) in a dry 250 mL flask that was purged with N<sub>2</sub> (three times) and the reaction

mixture was cooled to 0 °C. To this soln were added dropwise the amine (8.9 mmol, 1 equiv) and Et<sub>3</sub>N (1.49 mL, 10.7 mmol, 1.2 equiv). Following addition, the reaction mixture was allowed to warm to rt and stirred overnight. The reaction mixture was then concentrated and redissolved in EtOAc (50 mL) and washed with H<sub>2</sub>O (2 x 20 mL), sat. NaHCO<sub>3</sub> (20 mL) and brine (20 mL). The organic layer was dried (MgSO<sub>4</sub>), filtered and concentrated to provide the crude amide that could be purified by column chromatography or by distillation.

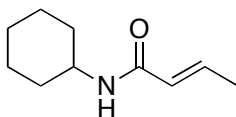

**(E)-N-Cyclohexylbut-2-enamide.** According to the general procedure using cyclohexylamine (0.88 g, 8.9 mmol, 1 equiv) and crotonoyl chloride (1.12 g, 10.7 mmol, 1.2 equiv), the product was obtained in 79% yield (1.18 g, 7.06 mmol) as a white solid after silica gel column chromatography (elution with hexane/EtOAc 7:3). mp = 113-115 °C. <sup>1</sup>H NMR (500 MHz, CDCl<sub>3</sub>): δ 6.78-6.85 (dq, *J* = 13.8, 6.9 Hz, 1H), 5.73-5.76 (d, *J* = 15.0 Hz, 1H), 5.23 (br s, 1H), 3.83-3.85 (m, 1H), 1.93-1.96 (m, 2H), 1.83-1.84 (d, *J* = 6.9 Hz, 3H), 1.61-1.73 (m, 3H), 1.34-1.43 (m, 2H), 1.09-1.20 (m, 3H). <sup>13</sup>C NMR (125.8 MHz, CDCl<sub>3</sub>): δ 165.1, 139.3, 125.7, 48.1, 33.3, 25.6, 25.0, 17.7; IR (neat) 3286, 3082, 2931, 2854, 1627, 1552 cm<sup>-1</sup>; HRMS (CI) calcd. for C<sub>10</sub>H<sub>18</sub>NO [M+H]<sup>+</sup> 168.1388, found 168.1389.

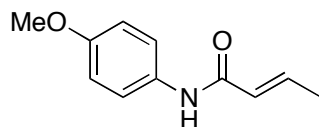

**(E)-N-(4-Methoxyphenyl)but-2-enamide.** According to the general procedure using *p*-anisidine (1.10 g, 8.9 mmol, 1 equiv) and crotonoyl chloride (1.12 g, 10.7 mmol, 1.2 equiv), the product was obtained in 82% yield (1.39 g, 7.29 mmol) as an off-white solid after silica gel column chromatography (gradient elution with hexane/EtOAc 4:1 to 1:1). mp = 119-120 °C. <sup>1</sup>H NMR (500 MHz, CDCl<sub>3</sub>): δ 7.45-7.47 (d, *J* = 8.5, 2H), 7.26 (br s, 1H), 6.92-6.99 (dq, *J* = 13.9, 6.8 Hz, 1H), 6.84-6.86 (d, *J* = 8.5, 2H), 5.91-5.95 (dd, *J* = 15.1, 1.6 Hz, 1H), 3.79 (s, 3H), 0.88-1.89 (d, *J* = 7.0, 3H). <sup>13</sup>C NMR (125.8 MHz, CDCl<sub>3</sub>): δ 164.2, 156.5, 141.0, 131.4, 125.6, 122.0, 114.2, 55.6, 17.9; IR (neat) 3290, 2967, 1669, 1628, 1532, 1510, 1244 cm<sup>-1</sup>; HRMS (CI) calcd. for C<sub>11</sub>H<sub>14</sub>NO<sub>2</sub> [M+H]<sup>+</sup> 192.1025, found 192.1027.

### **General Procedure for the Preparation of Racemic Secondary Potassium β-Trifluoroboratoamides:<sup>8</sup>**

A flask was charged with CuCl (14.6 mg, 0.15 mmol, 0.03 equiv), NaOt-Bu (42.6 mg, 0.44 mmol, 0.09 equiv), and DPEPhos (79.2 mg, 0.15 mmol, 0.03 equiv) and purged with N<sub>2</sub> (three times). THF (5 mL) was added and the reaction mixture was stirred at rt for 30 min. After 30 min, a soln of bis(pinacolato)diboron (1.56 g, 6.15 mmol, 1.25 equiv) in THF (5 mL, prepared in a separate flask under a N<sub>2</sub> atmosphere) was added and the flask containing the bis(pinacolato)diboron was rinsed with additional THF (5 mL) and also added to the reaction mixture. After stirring for 10 min, the α,β-unsaturated amide (4.92 mmol, 1.00 equiv) and MeOH (398 μL, 9.84 mmol, 2 equiv) were added, and the reaction

was stirred at rt until no starting material amide was observed by TLC or  $^1\text{H}$  NMR spectroscopy. The reaction mixture was filtered through a pad of Celite and rinsed with EtOAc and concentrated to give the crude borylated compound. The crude borylated compound was dissolved in MeCN (10 mL) and sat. aq.  $\text{KHF}_2$  (4.5 M, 4.37 mL, 19.7 mmol, 4 equiv) was added. The reaction mixture was stirred for 2 h, concentrated, azeotroped with wet MeOH<sup>9</sup> or EtOH, and placed on the high vacuum overnight. The crude product was extracted with hot acetone or  $\text{CH}_3\text{CN}$  (3 x 10 mL), filtered, and then concentrated. To the resulting crude material,  $\text{Et}_2\text{O}$  was added (10 mL), and the mixture was sonicated for 30 min and filtered to yield the desired  $\beta$ -trifluoroboratoamides. (N.B. In some cases, the purification of the RBPIn material was made easier by purification by column chromatography before quench with  $\text{KHF}_2$ ).

**General Procedure for the Preparation of Enantioenriched Secondary Potassium  $\beta$ -Trifluoroboratoamides:<sup>8</sup>**

A flask was charged with CuCl (17.8 mg, 0.18 mmol, 0.03 equiv),  $\text{NaO}t\text{-Bu}$  (51.7 mg, 0.54 mmol, 0.09 equiv), and (*R*)-(*S*)-JosiPhos (115 mg, 0.18 mmol, 0.03 equiv) and purged with  $\text{N}_2$  (three times). THF (5 mL) was added and the reaction mixture was stirred at rt for 30 min. After 30 min, a soln of bis(pinacolato)diboron (1.90 g, 7.47 mmol, 1.25 equiv) in THF (5 mL, prepared in a separate flask under a  $\text{N}_2$  atmosphere) was added, and the flask containing the bis(pinacolato)diboron was rinsed with additional THF (5 mL) and then added to the reaction mixture. After stirring for 10 min, the  $\alpha,\beta$ -unsaturated amide (5.98 mmol, 1.00 equiv) and MeOH (485  $\mu\text{L}$ , 12.0 mmol, 2 equiv) were added, and the reaction was stirred at rt until no starting material amide was

observed by TLC or  $^1\text{H}$  NMR spectroscopy. The reaction mixture was filtered through a pad of Celite and rinsed with EtOAc and concentrated to give the crude borylated compound. The crude borylated compound was dissolved in MeCN (10 mL) and sat. aq  $\text{KHF}_2$  (4.5 M, 4.37 mL, 19.7 mmol, 4 equiv) was added. The reaction mixture was stirred for 2 h, concentrated, azeotroped with wet MeOH or EtOH, and placed on the high vacuum overnight. The crude product was extracted with hot acetone or  $\text{CH}_3\text{CN}$  (3 x 10 mL), filtered, and then concentrated. To the resulting crude material,  $\text{Et}_2\text{O}$  was added (10 mL), and the mixture was sonicated for 30 min and filtered to yield the desired  $\beta$ -boratoamidohomoenolate.

**Compound characterization of  $\beta$ -Trifluoroboratoamides:<sup>10</sup>**

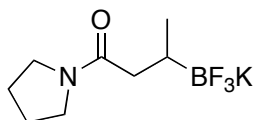

**Potassium 1-(Pyrrolidin-1-yl)-3-(trifluoroborato)butan-1-one.** According to the general procedure for the racemic preparation using (*E*)-1-(pyrrolidin-1-yl)but-2-en-1-one (1.37 g, 9.84 mmol), the boronate ester was obtained in 89% yield (2.33 g, 8.76 mmol) after purification by column chromatography (elution in hexanes/EtOAc 4:1). A portion of this product (1.82 g, 6.81 mmol) was subjected to the general procedure for trifluoroborate preparation, and after extraction with acetone (3 x 20 mL) and sonication with  $\text{Et}_2\text{O}$  (10 mL) for 30 min, the title compound was obtained as a white solid in 84% yield (1.43 g, 5.78 mmol) for an overall yield of 75% from the corresponding alkene. mp = 119-121 °C.  $^1\text{H}$  NMR (500 MHz, acetone- $d_6$ ):  $\delta$  3.37-3.51 (m, 2H), 3.29-3.32 (m, 2H), 2.19-2.23 (dd,  $J$  = 13.4, 6.6 Hz, 1H), 1.70-1.98 (m, 5H), 0.79 (m, 4H).  $^{13}\text{C}$  NMR (125.8

MHz, acetone- $d_6$ ):  $\delta$  173.7, 46.1, 45.0, 38.6, 25.8, 24.0, 16.1.  $^{19}\text{F}$  NMR (470.8 MHz, acetone- $d_6$ ):  $\delta$  -148.0.  $^{11}\text{B}$  NMR (128.4 MHz, acetone- $d_6$ ):  $\delta$  5.21. IR (KBr) 2966, 2877, 1620, 1458, 1343, 1314  $\text{cm}^{-1}$ . HRMS (ESI) calcd. for  $\text{C}_9\text{H}_{17}\text{BNO}_2$  [ $\text{M}(-\text{F}_3\text{K})(+\text{OMe})$ ] $^+$  182.1352, found 182.1344.

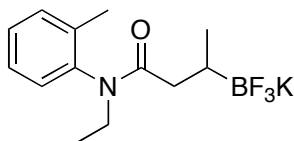

**Potassium *N*-Ethyl-*N*-(*o*-tolyl)-3-(trifluoroborato)butanamide.** According to the general procedure for the racemic preparation using (*E*)-*N*-ethyl-*N*-(*o*-tolyl)but-2-enamide (10.0 g, 49.2 mmol) and azeotroping with EtOH, the product was obtained as a white crystalline solid in 93% yield (14.2 g, 45.8 mmol). The title compound was purified by continuous Soxhlet extraction with acetone (100 mL), and the resulting solution was concentrated until minimally soluble in hot acetone, and then Et<sub>2</sub>O (~50 mL) was added to precipitate. mp = 229-231 °C.  $^1\text{H}$  NMR (500 MHz, asterisk denotes minor rotamer peaks, DMSO- $d_6$ ):  $\delta$  7.17-7.32 (m, 3H), 7.05 (m, 1H), 3.88-3.99 (m, 1H), 3.12-3.16\* (m, 1H), 2.97-3.01 (m, 1H), 2.07-2.14 (m, 3H), 1.74-1.82 (m, 1H), 1.43-1.49\* (m, 1H), 1.27-1.32 (m, 1H), 0.95-1.02 (m, 3H), 0.53-0.74 (m, 4H).  $^{13}\text{C}$  NMR (125.8 MHz, asterisk denotes rotamer peaks, DMSO- $d_6$ ):  $\delta$  174.7, 174.2\*, 142.2, 141.9\*, 136.2, 135.6\*, 131.4, 131.4\*, 130.0, 129.8\*, 128.0, 127.9\*, 127.2, 127.1\*, 42.6, 42.2\*, 38.5, 37.2\*, 17.6, 16.5, 16.3\*, 13.4, 13.2\*.  $^{19}\text{F}$  NMR (470.8 MHz, DMSO- $d_6$ ):  $\delta$  -145.7.  $^{11}\text{B}$  NMR (128.4 MHz, DMSO- $d_6$ ):  $\delta$  4.80. IR (KBr) 2938, 2870, 1648, 1492, 1458, 1409, 1294  $\text{cm}^{-1}$ . HRMS (ESI) calcd. for  $\text{C}_{14}\text{H}_{21}\text{BNO}_2$  [ $\text{M}(-\text{F}_3\text{K})(+\text{OMe})$ ] $^+$  246.1665, found 246.1677.



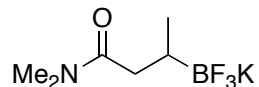

**Potassium *N,N*-Dimethyl-3-(trifluoroborato)butanamide.** According to the general procedure for the racemic preparation using (*E*)-*N,N*-dimethylbut-2-enamide (2.23 g, 19.7 mmol), the product was obtained as a white amorphous solid in 83% yield (3.62 g, 16.4 mmol). The title compound was extracted with hot acetone (3 x 15 mL) and concentrated. The crude substrate was dissolved in CH<sub>3</sub>CN (5 mL) and washed with hexanes (5 mL) to provide the title compound. <sup>1</sup>H NMR (500 MHz, acetone-*d*<sub>6</sub>): δ 3.00 (s, 3H), 2.82 (s, 3H), 2.24-2.29 (dd, *J* = 13.6, 7.2 Hz, 1H), 2.03-2.07 (m, 1H), 0.80-0.81 (m, 4H). <sup>13</sup>C NMR (125.8 MHz, acetone-*d*<sub>6</sub>): δ 176.6, 38.8, 37.8, 35.2, 17.1. <sup>19</sup>F NMR (470.8 MHz, acetone-*d*<sub>6</sub>): δ -147.4. <sup>11</sup>B NMR (128.4 MHz, acetone-*d*<sub>6</sub>): δ 5.68. IR (neat) 2943, 2858, 1614 cm<sup>-1</sup>. HRMS (ESI) calcd. for C<sub>7</sub>H<sub>15</sub>BNO<sub>2</sub> [M(-F<sub>3</sub>K)(+OMe)]<sup>+</sup> 156.1196, found 156.1182.

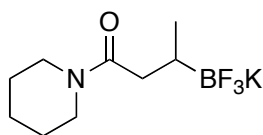

**Potassium 1-(Piperidin-1-yl)-3-(trifluoroborato)butan-1-one.** According to the general procedure for the racemic preparation using (*E*)-1-(piperidin-1-yl)but-2-en-1-one (754 mg, 4.92 mmol), the product was obtained as a light yellow amorphous solid in 81% yield (1.04 mg, 3.98 mmol) after hot filtration with acetone (3 x 10 mL), concentration, and sonication with Et<sub>2</sub>O (10 mL). <sup>1</sup>H NMR (500 MHz, acetone-*d*<sub>6</sub>): δ 3.42-3.43 (m, 4H), 2.22-2.23 (dd, *J* = 13.3, 8.1 Hz, 1H), 2.05-2.06 (m, 1H), 1.43-1.60 (m, 6H), 0.80-

0.81 (d,  $J = 7.0$  Hz, 3H), 0.71 (br s, 1H).  $^{13}\text{C}$  NMR (125.8 MHz, acetone- $d_6$ ):  $\delta$  173.4, 46.2, 41.5, 37.4, 26.3, 25.6, 24.3, 15.8.  $^{19}\text{F}$  NMR (470.8 MHz, acetone- $d_6$ ):  $\delta$  -148.0.  $^{11}\text{B}$  NMR (128.4 MHz, acetone- $d_6$ ):  $\delta$  5.60. IR (neat) 2937, 2861, 1606, 1471, 1446, 1274  $\text{cm}^{-1}$ . HRMS (ESI) calcd. for  $\text{C}_{10}\text{H}_{19}\text{BNO}_2 [\text{M}(-\text{F}_3\text{K})(+\text{OMe})]^+$  196.1509, found 196.1511.

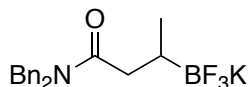

**Potassium *N,N*-Dibenzyl-3-(trifluoroborato)butanamide.** According to the general procedure for the racemic preparation using (*E*)-*N,N*-dibenzylbut-2-enamide (1.31 g, 4.92 mmol), the product was obtained as a white crystalline solid in 70% yield (1.28 g, 3.42 mmol) after hot filtration with acetone (5 x 20 mL) and sonication with Et<sub>2</sub>O (10 mL). mp = 238-240 °C.  $^1\text{H}$  NMR (500 MHz, DMSO- $d_6$ ):  $\delta$  7.13-7.40 (m, 10H), 4.66-4.69 (d,  $J = 15.1$  Hz, 1H), 4.57-4.61 (d,  $J = 17.1$  Hz, 1H), 4.30-4.33 (d,  $J = 17.1$  Hz, 1H), 4.17-4.20 (d,  $J = 15.1$  Hz, 1H), 2.39-2.43 (dd,  $J = 13.9, 2.9$  Hz, 1H), 1.80-1.85 (dd,  $J = 13.9, 11.4$  Hz, 1H), 0.73-0.75 (d,  $J = 7.0$  Hz, 3H), 0.62 (br s, 1H).  $^{13}\text{C}$  NMR (125.8 MHz, DMSO- $d_6$ ):  $\delta$  175.7, 138.4, 137.8, 128.7, 128.4, 127.4, 127.1, 126.8, 126.4, 49.7, 47.1, 37.2, 16.1.  $^{19}\text{F}$  NMR (470.8 MHz, DMSO- $d_6$ ):  $\delta$  -145.7.  $^{11}\text{B}$  NMR (128.4 MHz, DMSO- $d_6$ ):  $\delta$  4.67. IR (KBr) 3064, 3028, 2939, 2864, 1628, 1447, 1429, 1313  $\text{cm}^{-1}$ . HRMS (ESI) calcd. for  $\text{C}_{19}\text{H}_{23}\text{BNO}_2 [\text{M}(-\text{F}_3\text{K})(+\text{OMe})]^+$  308.1826, found 308.1836.

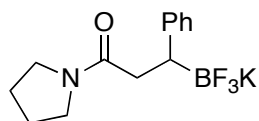

**Potassium 3-Phenyl-1-(pyrrolidin-1-yl)-3-(trifluoroborato)propan-1-one.** According to the general procedure for the racemic preparation using (*E*)-3-phenyl-1-(pyrrolidin-1-yl)prop-2-en-1-one (250 mg, 1.24 mmol), the product was obtained as a white amorphous solid in 86% yield (331 mg, 1.07 mmol). The title compound was extracted via hot filtration with CH<sub>3</sub>CN (3 x 10 mL) and purified by concentration until minimally soluble, followed by addition of Et<sub>2</sub>O (~5 mL), and sonication. The supernatant was decanted off, providing the title compound. <sup>1</sup>H NMR (500 MHz, acetone-*d*<sub>6</sub>): δ 7.19-7.21 (d, *J* = 7.5, 2H), 7.05-7.08 (t, *J* = 7.5, 2H), 6.90-6.93 (t, *J* = 7.5, 1H), 3.31-3.43 (m, 1H), 3.21-3.30 (m, 3H), 2.61-2.65 (dd, *J* = 14.0, 7.4 Hz, 1H), 2.42-2.46 (dd, *J* = 14.0, 7.5 Hz, 1H), 2.20 (m, 1H), 1.69-1.85 (m, 4H). <sup>13</sup>C NMR (125.8 MHz, acetone-*d*<sub>6</sub>): δ 174.3, 150.7, 129.3, 127.9, 123.9, 47.1, 46.0, 39.3, 26.8, 25.0. <sup>19</sup>F NMR (470.8 MHz, acetone-*d*<sub>6</sub>): δ -144.4. <sup>11</sup>B NMR (128.4 MHz, acetone-*d*<sub>6</sub>): δ 5.16. IR (KBr) 3079, 3023, 2971, 2886, 1617, 1470, 1452 cm<sup>-1</sup>. HRMS (ESI) calcd. for C<sub>14</sub>H<sub>19</sub>BNO<sub>2</sub> [M(-F<sub>3</sub>K)(+OMe)]<sup>+</sup> 244.1509, found 244.1507.

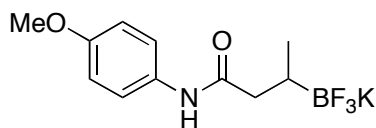

**Potassium *N*-(4-Methoxyphenyl)-3-(trifluoroborato)butanamide.** According to the general procedure for the racemic preparation using (*E*)-*N*-(4-methoxyphenyl)but-2-enamide (956 mg, 5.00 mmol), the product was obtained as a white crystalline solid in 84% yield (1.26 g, 4.23 mmol). The title compound was obtained after hot filtration with

CH<sub>3</sub>CN (3 x 20 mL), concentration until minimally soluble in CH<sub>3</sub>CN and precipitation with Et<sub>2</sub>O (~20 mL). mp = 169-171 °C. <sup>1</sup>H NMR (500 MHz, acetone-*d*<sub>6</sub>): δ 8.84 (br s, 1H), 7.57-7.59 (d, *J* = 8.5 Hz, 2H), 6.80-6.82 (d, *J* = 8.5 Hz, 2H), 3.74 (s, 3H), 2.33-2.37 (m, 1H), 2.00-2.05 (m, 1H), 0.83 (m, 4H). <sup>13</sup>C NMR (125.8 MHz, acetone-*d*<sub>6</sub>): δ 175.1, 156.2, 134.3, 121.6, 114.4, 55.6, 43.0, 16.6. <sup>19</sup>F NMR (470.8 MHz, acetone-*d*<sub>6</sub>): δ -147.2. <sup>11</sup>B NMR (128.4 MHz, acetone-*d*<sub>6</sub>): δ 5.28. IR (KBr) 3300, 3068, 2954, 2871, 1637, 1609, 1516, 1459, 1412, 1302, 1251 cm<sup>-1</sup>. HRMS (ESI) calcd. for C<sub>12</sub>H<sub>17</sub>BNO<sub>3</sub> [M(-F<sub>3</sub>K)(+OMe)]<sup>+</sup> 234.1301, found 234.1309.

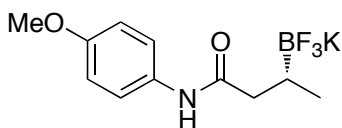

**Potassium (*R*)-*N*-(4-Methoxyphenyl)-3-(trifluoroborato)butanamide.** According to the general procedure for the enantioenriched preparation using (*E*)-*N*-(4-methoxyphenyl)but-2-enamide (373 mg, 1.95 mmol), the product was obtained as an off-white solid in 78% yield (458 mg, 1.53 mmol) with an enantiomeric ratio of 7:93 after filtration with CH<sub>3</sub>CN (5 x 10 mL) and sonication with Et<sub>2</sub>O (10 mL) with spectra in accordance with that described above.  $[\alpha]_D^{20} = +10.8$  (*c* = 0.2, MeOH). The absolute configuration (*R*) of the major enantiomer was determined on the basis of the experiments performed with 3-hydroxy-*N*-(4-methoxyphenyl)butanamide described below and the results obtained by Yun and coworkers.<sup>8a</sup>

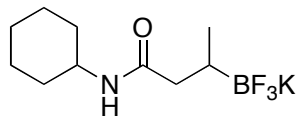

**Potassium *N*-Cyclohexyl-3-(trifluoroborato)butanamide.** According to the general procedure for the racemic preparation using (*E*)-*N*-cyclohexylbut-2-enamide (0.50 g, 2.99 mmol), the product was obtained as a white crystalline solid in 79% yield (649 mg, 2.36 mmol) after hot filtration with CH<sub>3</sub>CN (5 x 10 mL) and sonication with Et<sub>2</sub>O (10 mL). mp = 214-215 °C. <sup>1</sup>H NMR (500 MHz, DMSO-*d*<sub>6</sub>): δ 7.16-7.17 (d, *J* = 7.8 Hz, 1H), 3.48-3.49 (m, 1H), 1.96-2.00 (dd, *J* = 13.6, 3.8 Hz, 1H), 1.55-1.66 (m, 6H), 1.07-1.21 (m, 5H), 0.59-0.60 (d, *J* = 7.0 Hz, 3H), 0.49 (br s, 1H). <sup>13</sup>C NMR (125.8 MHz, DMSO-*d*<sub>6</sub>): δ 174.2, 47.0, 40.4, 32.8, 32.6, 25.4, 24.7, 15.6. <sup>19</sup>F NMR (470.8 MHz, DMSO-*d*<sub>6</sub>): δ -144.7. <sup>11</sup>B NMR (128.4 MHz, DMSO-*d*<sub>6</sub>): δ 4.64. IR (KBr) 3350, 2928, 2856, 1620, 1537, 1452 cm<sup>-1</sup>. HRMS (ESI) calcd. for C<sub>10</sub>H<sub>18</sub>BF<sub>3</sub>NO [M-K]<sup>-</sup> 236.1434, found 236.1433.

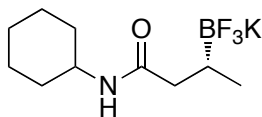

**Potassium (*R*)-*N*-Cyclohexyl-3-(trifluoroborato)butanamide.** According to the general procedure for the enantioenriched preparation using (*E*)-*N*-cyclohexylbut-2-enamide (1.00 g, 5.98 mmol), the product was obtained as a white crystalline solid in 74% yield (1.22 g, 4.42 mmol) with an enantiomeric ratio of 6:94 after filtration with CH<sub>3</sub>CN (5 x 10 mL) and sonication with Et<sub>2</sub>O (10 mL) with spectra in accordance with that described above. [α]<sub>D</sub><sup>20</sup> = +9.8 (c = 0.2, MeOH). The absolute configuration (*R*) of the major enantiomer was deduced on the basis of the experiments performed with 3-

hydroxy-*N*-(4-methoxyphenyl)butanamide described below and the results obtained by Yun and coworkers.<sup>8a</sup>

**Determination of Absolute Configuration and Enantiomeric Ratio of Enantioenriched Potassium Trifluoroboratoenolates:**

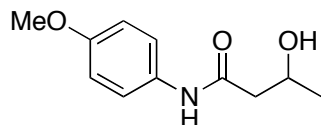

**3-Hydroxy-*N*-(4-methoxyphenyl)butanamide.** Before quench of the borylation reaction of (*E*)-*N*-(4-methoxyphenyl)but-2-enamide (186 mg, 0.58 mmol, 1.0 equiv) with  $\text{KHF}_2$ , an aliquot was removed and concentrated. The crude borylated material was dissolved in THF (2.5 mL) and  $\text{H}_2\text{O}$  (2.5 mL) and sodium perborate (449 mg, 2.92 mmol, 5.0 equiv) was added to the mixture and was stirred vigorously at rt for 2 h. The crude reaction mixture was purified by silica gel column chromatography (elution with hexane/EtOAc 1:1) and the title compound was obtained in 80% yield (98.1 mg, 0.47 mmol) as a white crystalline solid. mp = 135-137 °C.  $^1\text{H}$  NMR (500 MHz,  $\text{CDCl}_3$ ):  $\delta$  7.77 (br s, 1H), 7.38-7.39 (d,  $J = 9.0$  Hz, 2H), 6.84-6.85 (d,  $J = 9.0$  Hz, 2H), 4.26-4.29 (m, 1H), 3.78 (s, 3H), 3.44 (d,  $J = 2.9$  Hz, 1H), 2.41-2.51 (m, 2H), 1.27-1.28 (d,  $J = 6.5$  Hz, 3H);  $^{13}\text{C}$  NMR (125.8 MHz,  $\text{CDCl}_3$ ):  $\delta$  170.6, 156.8, 130.8, 122.3, 114.4, 65.2, 55.7, 45.1, 23.2; IR (neat) 3242, 3131, 3076, 2962, 1654, 1604, 1549, 1513, 1237  $\text{cm}^{-1}$ ; HRMS (ESI) calcd. for  $\text{C}_{11}\text{H}_{16}\text{NO}_3$   $[\text{M}+\text{H}]^+$  210.1130, found 210.1127. A method was developed to separate the enantiomers using SFC analysis (Column OD-H, 8% *i*-PrOH, 4 mL, 12MPa); (*S*)-isomer  $t_r = 4.9$  min and (*R*)-isomer  $t_r = 5.5$  min. The determination of absolute configuration of the enantiomers was determined via derivation of (*S*)-

hydroxybutyric acid described below.

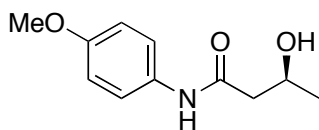

**(S)-3-Hydroxy-N-(4-methoxyphenyl)butanamide.** A dry flask was purged with N<sub>2</sub> and charged with (S)-3-hydroxybutyric acid (26.0 mg, 0.25 mmol, 1.0 equiv) and CH<sub>2</sub>Cl<sub>2</sub> (2.5 mL), and the reaction vessel was cooled to 0 °C. To the reaction mixture was added *i*-Pr<sub>2</sub>NEt (153 μL, 0.88 mmol, 3.5 equiv), HATU (114 mg, 0.30 mmol, 1.2 equiv), and *p*-anisidine (33.9 mg, 0.28 mmol, 1.1 equiv). Following the addition of reagents, the reaction mixture was allowed to warm to rt and stir overnight. The title compound was isolated in 75% yield (39.1 mg, 0.19 mmol) after purification by column chromatography (elution with hexane/EtOAc 1:1) with spectra in accordance with that described above for the racemate.  $[\alpha]_D^{20} = +14.5$  (c = 0.2, MeOH). Using SFC analysis, co-injection of the (S)-enantiomer with the racemate was used to identify the corresponding retention time of each compound.

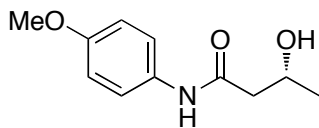

**(R)-3-Hydroxy-N-(4-methoxyphenyl)butanamide.** Following the procedure described above for oxidation using the enantioselective borylated intermediate, the title compound was obtained in 56% yield (48.8 mg, 0.23 mmol) as a white crystalline solid with spectra in accordance with that described above for the racemate. Using SFC analysis (Column OD-H, 8% *i*-PrOH, 4 mL, 12MPa); the enantiomeric ratio was measured to be 7:93 with

the major enantiomer having an absolute configuration of *R*. (*S*)-isomer  $t_r = 4.9$  min and (*R*)-isomer  $t_r = 5.5$  min.

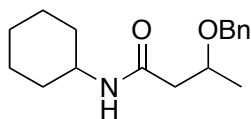

**3-(Benzyloxy)-*N*-cyclohexylbutanamide.** Before quench of the borylation reaction of (*E*)-*N*-cyclohexylbut-2-enamide with  $\text{KHF}_2$ , an aliquot was removed and concentrated. The crude borylated material (302 mg, 1.02 mmol) was dissolved in THF (5 mL) and  $\text{H}_2\text{O}$  (5 mL), and sodium perborate (788 mg, 5.10 mmol, 5 equiv) was added and stirred vigorously at rt for 2 h. The reaction was diluted with  $\text{H}_2\text{O}$  and extracted with EtOAc (2 x 5 mL). The combined organic layers were washed with brine (5 mL), dried ( $\text{Mg}_2\text{SO}_4$ ), and concentrated. The crude reaction mixture was purified by silica gel column chromatography (elution with hexane/EtOAc 1:1). The resulting solid was dissolved in THF (15 mL) under a dry,  $\text{N}_2$  atmosphere and cooled to 0 °C. To the soln was added NaH (60%, 40.8 mg, 1.02 mmol, 1 equiv), and the reaction mixture was stirred for 30 min, and then BnBr (175 mg, 1.02 mmol, 1.00 equiv) was added. The reaction mixture was allowed to warm to rt and stirred until no starting material was detected by TLC. The reaction mixture was quenched with  $\text{H}_2\text{O}$  (10 mL) and extracted with  $\text{CH}_2\text{Cl}_2$  (2 x 10 mL). The combined organic layers were dried ( $\text{Mg}_2\text{SO}_4$ ), filtered, and concentrated and purified by column chromatography (elution with hexanes/EtOAc 4:1) to give the title compound as a white solid in 59% yield (166 mg, 0.60 mmol). mp = 74-76 °C.  $^1\text{H}$  NMR (500 MHz,  $\text{CDCl}_3$ ):  $\delta$  7.30-7.36 (m, 5H), 6.11 (br s, 1H), 4.62-4.64 (d,  $J = 11.5$  Hz, 1H), 4.45-4.48 (d,  $J = 11.5$  Hz, 1H), 3.95-4.00 (m, 1H), 3.74-3.80 (m, 1H), 2.38-2.40 (m, 2H),



1.85-1.87 (m, 2H), 1.59-1.66 (m, 4H), 1.06-1.36 (m, 7H);  $^{13}\text{C}$  NMR (125.8 MHz,  $\text{CDCl}_3$ ):  $\delta$  170.2, 138.4, 128.7, 128.0, 128.0, 73.0, 71.1, 48.0, 44.4, 33.2, 25.8, 24.9, 19.8; IR (neat) 3291, 3066, 2931, 2855, 1638, 1549  $\text{cm}^{-1}$ ; HRMS (ESI) calcd. for  $\text{C}_{17}\text{H}_{25}\text{NO}_2\text{Na}$   $[\text{M}+\text{Na}]^+$  298.1783, found 298.1793. Using the title compound, a chiral HPLC method was developed (Column AS-H, 5% *i*-PrOH, 0.7 mL). (*S*)-isomer  $t_r = 47.2$  min and (*R*)-isomer  $t_r = 42.3$  min.<sup>11</sup>

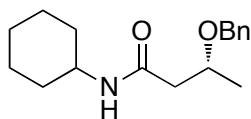

**(*R*)-3-(Benzyloxy)-*N*-cyclohexylbutanamide.** Following the procedure described above for oxidation and benzylation using the enantioselective borylated intermediate, the title compound was obtained in 57% yield in accordance the spectral data for the racemate. Using the HPLC method described above (Column AS-H, 5% *i*-PrOH, 0.7 mL), the product has an enantiomeric ratio of 6:94 *S*:*R*. with an absolute configuration assumed to be *R*.  $[\alpha]_D^{20} = -13.1$  ( $c = 0.2$ , MeOH).

#### **Procedure for the Suzuki-Miyaura Cross-Coupling with Aryl Electrophiles:**

To a 10 mL Biotage Microwave vial were added  $\text{Pd}(\text{OAc})_2$  (5.6 mg, 0.03 mmol, 0.1 equiv), ligand (0.05 mmol, 0.20 equiv), base (0.75 mmol, 3 equiv), aryl electrophile (0.25 mmol, 1 equiv), and potassium  $\beta$ -trifluoroboratoamide (0.25 mmol, 1 equiv). This mixture was sealed in the microwave vial and purged with  $\text{N}_2$  (three times). To the vial was added CPME (1.0 mL) and  $\text{H}_2\text{O}$  (0.15 mL), and then the reaction was heated to 95  $^\circ\text{C}$  for 20-24 h. The reaction mixture was allowed to cool to rt and quenched with  $\text{H}_2\text{O}$  (1

mL). The organic layer was separated and the aqueous layer was washed with EtOAc (3 x 1 mL). The resulting soln was concentrated and purified by silica gel column chromatography.

**Condition A:** 10 mol % of Pd(OAc)<sub>2</sub>, 20 mol % of XPhos, 3 equiv K<sub>2</sub>CO<sub>3</sub>, and 6.7:1 CPME/H<sub>2</sub>O (0.25 M)

**Condition B:** 10 mol % of Pd(OAc)<sub>2</sub>, 20 mol % of XPhos, 3 equiv Cs<sub>2</sub>CO<sub>3</sub>, and 6.7:1 CPME/H<sub>2</sub>O (0.25 M)

**Condition C:** 10 mol % of Pd(OAc)<sub>2</sub>, 20 mol % of SPhos, 3 equiv Cs<sub>2</sub>CO<sub>3</sub>, and 6.7:1 CPME/H<sub>2</sub>O (0.25 M)

#### Compound Characterization of Cross-Coupled Products:

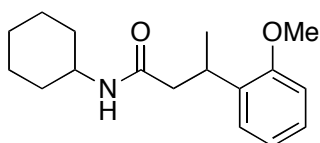

**N-Cyclohexyl-3-(2-methoxyphenyl)butanamide.** According to the general procedure using 2-chloroanisole on a 0.25 mmol scale, the product was obtained in 90% yield (61.6 mg, 0.22 mmol) as a white solid after silica gel column chromatography (elution with 2% MeOH in CH<sub>2</sub>Cl<sub>2</sub>). mp: 105-107 °C. <sup>1</sup>H NMR (500 MHz, CDCl<sub>3</sub>): δ 7.16-7.20 (m, 2H), 6.90-6.93 (m, 1H), 6.85-6.86 (d, *J* = 8.1 Hz, 1H), 5.25-5.29 (m, 1H), 3.84 (s, 3H), 3.65-3.70 (m, 1H), 3.55-3.62 (m, 1H), 2.52-2.57 (dd, *J* = 14.1, 7.5 Hz, 1H), 2.33-2.37 (dd, *J* = 14.1, 7.5 Hz, 1H), 1.71-1.77 (m, 2H), 1.54-1.61 (m, 3H), 1.27-1.35 (m, 5H), 0.88-1.13 (m, 3H). <sup>13</sup>C NMR (125.8 MHz, CDCl<sub>3</sub>): δ 171.2, 156.9, 134.0, 127.5, 127.4, 121.0, 110.8, 55.49, 47.9, 44.5, 33.2, 33.1, 30.9, 25.7, 24.9, 20.6; IR (neat) 3287, 3065, 2930, 2848, 1636, 1545, 1242 cm<sup>-1</sup>; HRMS (ESI) calcd. for C<sub>17</sub>H<sub>26</sub>NO<sub>2</sub> [M+H]<sup>+</sup> 276.1964, found 276.1968.

The title compound was also prepared according to the general procedure using 2-bromoanisole (46.8 mg, 0.25 mmol) and was isolated as a white solid in 63% yield (43.1 mg, 0.16 mmol) with spectral data in accordance with data listed above.

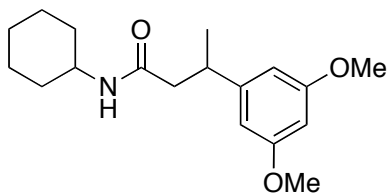

***N*-Cyclohexyl-3-(3,5-dimethoxyphenyl)butanamide.** According to the general procedure using 1-chloro-3,5-dimethoxybenzene on a 0.25 mmol scale, the product was obtained in 72% yield (55.1 mg, 0.18 mmol) as a white solid after silica gel column chromatography (elution with hexane/EtOAc 7:3). mp: 102-103 °C. <sup>1</sup>H NMR (500 MHz, CDCl<sub>3</sub>): δ 6.37-6.38 (m, 2H), 6.30-6.31 (m, 1H), 5.13-5.14 (d, *J* = 7.5 Hz, 1H), 3.76 (s, 6H), 3.66-3.72 (m, 1H), 3.16-3.23 (m, 1H), 2.29-2.39 (qd, *J* = 13.7, 7.5 Hz, 2H), 1.80-1.82 (m, 1H), 1.69-1.71 (m, 1H), 1.54-1.63 (m, 3H), 1.26-1.35 (m, 5H), 0.87-1.11 (m, 3H). <sup>13</sup>C NMR (125.8 MHz, CDCl<sub>3</sub>): δ 170.7, 161.0, 148.7, 105.1, 98.3, 55.4, 48.0, 46.2, 37.6, 33.2, 33.1, 25.6, 24.8, 24.8, 21.6; IR (neat) 3289, 3077, 2931, 2854, 1638, 1597, 1550, 1460, 1205, 1154 cm<sup>-1</sup>; HRMS (ESI) calcd. for C<sub>18</sub>H<sub>27</sub>NO<sub>3</sub>Na [M+Na]<sup>+</sup> 328.1889, found 328.1879.

The title compound was also prepared according to the general procedure using 1-bromo-3,5-dimethoxybenzene (54.3 mg, 0.25 mmol) and was isolated as a white solid in 74% yield (56.4 mg, 0.18 mmol) with spectral data in accordance with data listed above.

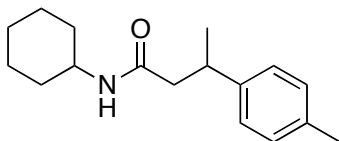

***N*-Cyclohexyl-3-(*p*-tolyl)butanamide.** According to the general procedure using 4-chlorotoluene on a 0.25 mmol scale, the product was obtained in 91% yield (55.8 mg, 0.23 mmol) as an off-white solid after silica gel column chromatography (elution with hexane/EtOAc 4:1). mp: 95-97 °C. <sup>1</sup>H NMR (500 MHz, CDCl<sub>3</sub>): δ 7.11 (s, 4H), 5.01 (br s, 1H), 3.67-3.69 (m, 1H), 3.20-3.25 (dd, J = 14.4, 7.2 Hz, 1H), 2.23-2.39 (m, 2H), 2.31 (s, 3H), 1.80-1.82 (m, 1H), 1.55-1.69 (m, 4H), 1.25-1.35 (m, 5H) 0.87-1.11 (m, 3H). <sup>13</sup>C-NMR (125.8 MHz, CDCl<sub>3</sub>): δ 170.8, 143.1, 136.1, 129.4, 126.8, 48.0, 46.4, 36.9, 33.2, 33.1, 25.7, 24.9, 24.8, 21.9, 21.1; IR (neat) 3287, 3065, 2930, 2854, 1638, 1550, 1450 cm<sup>-1</sup>; HRMS (ESI) calcd. for C<sub>17</sub>H<sub>26</sub>NO [M+H]<sup>+</sup> 260.2014, found 260.2019.

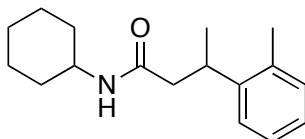

***N*-Cyclohexyl-3-(*o*-tolyl)butanamide.** According to the general procedure using 2-chlorotoluene on a 0.25 mmol scale, the product was obtained in 88% yield (56.7 mg, 0.22 mmol) as a white solid after silica gel column chromatography (elution with hexane/EtOAc 4:1). mp: 105-106 °C. <sup>1</sup>H NMR (500 MHz, CDCl<sub>3</sub>): δ 7.07-7.19 (m, 4H), 5.04-5.05 (m, 1H), 3.63-3.70 (m, 1H), 3.51-3.58 (m, 1H), 2.31-2.43 (m, 5H), 1.80-1.82 (m, 1H), 1.54-1.66 (m, 4H), 1.20-1.32 (m, 5H), 0.81-1.05 (m, 3H). <sup>13</sup>C NMR (125.8 MHz, CDCl<sub>3</sub>): δ 170.9, 144.3, 135.8, 130.7, 126.4, 126.2, 125.1, 48.0, 45.6, 33.2, 32.9, 32.2, 25.6, 24.8, 24.8, 21.6, 19.7; IR (neat) 3292, 3075, 2930, 2848, 1637, 1546, 1450 cm<sup>-1</sup>; HRMS (ESI) calcd. for C<sub>17</sub>H<sub>26</sub>NO [M+H]<sup>+</sup> 260.2014, found 260.2013.

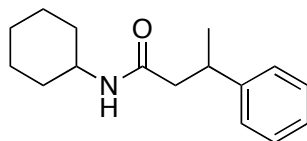

***N*-Cyclohexyl-3-phenylbutanamide.** According to the general procedure using chlorobenzene on a 0.25 mmol scale, the product was obtained in 81% yield (49.4 mg, 0.20 mmol) as a white solid after silica gel column chromatography (elution with 2% MeOH in CH<sub>2</sub>Cl<sub>2</sub>). mp: 92-94 °C. <sup>1</sup>H NMR (500 MHz, CDCl<sub>3</sub>): δ 7.28-7.31 (m, 2H), 7.18-7.23 (m, 3H), 5.07 (s, 1H), 3.63-3.71 (dtt, *J* = 12.2, 8.1, 3.9 Hz, 1H), 3.23-3.30 (m, 1H), 2.37-2.38 (d, 2H), 1.80-1.82 (m, 1H), 1.54-1.59 (m, 4H), 1.24-1.34 (m, 5H), 0.95-1.12 (m, 2H), 0.81-0.89 (m, 1H). <sup>13</sup>C-NMR (125.8 MHz, CDCl<sub>3</sub>): δ 170.5, 145.8, 128.5, 126.8, 126.3, 47.7, 46.2, 37.1, 33.0, 32.8, 25.4, 24.6, 24.6, 21.6; IR (neat) 3299, 3059, 2932, 2854, 1636, 1544, 1450 cm<sup>-1</sup>; HRMS (ESI) calcd. for C<sub>16</sub>H<sub>23</sub>NONa [M+Na]<sup>+</sup> 268.1677, found 268.1684.

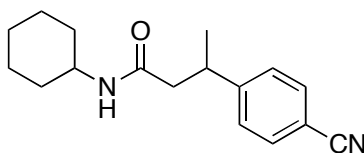

**3-(4-Cyanophenyl)-*N*-cyclohexylbutanamide.** According to the general procedure using 4-chlorobenzonitrile on a 0.25 mmol scale, the product was obtained in 76% yield (51.3 mg, 0.19 mmol) as an off-white solid after silica gel column chromatography (elution with hexane/EtOAc 4:1). mp: 108-110 °C. <sup>1</sup>H NMR (500 MHz, CDCl<sub>3</sub>): δ 7.56-7.58 (d, *J* = 8.3 Hz, 2H), 7.32-7.33 (d, *J* = 8.3 Hz, 2H), 5.18-5.20 (d, *J* = 7.4 Hz, 1H), 3.63 (dtt, *J* = 12.1, 8.1, 3.9 Hz, 1H), 3.34-3.41 (m, 1H), 2.31 (qd, *J* = 14.0, 7.5 Hz, 2H), 1.82-1.84 (m, 1H), 1.55-1.67 (m, 4H), 1.24-1.35 (m, 5H), 0.85-1.14 (m, 3H). <sup>13</sup>C-NMR (125.8

MHz, CDCl<sub>3</sub>): 169.8, 151.7, 132.5, 127.9, 119.1, 110.3, 48.2, 45.5, 37.2, 33.2, 33.2, 25.6, 24.9, 24.8, 21.4; IR (neat) 3293, 3070, 2932, 2855, 2228, 1641, 1548, 1451 cm<sup>-1</sup>; HRMS (ESI) calcd. for C<sub>17</sub>H<sub>23</sub>N<sub>2</sub>O [M+H]<sup>+</sup> 271.1810, found 271.1822.

The title compound was also prepared according to the general procedure using 4-bromobenzonitrile (45.5 mg, 0.25 mmol) and was isolated as an off-white solid in 72% yield (48.9 mg, 0.18 mmol) with spectral data in accordance with data listed above.

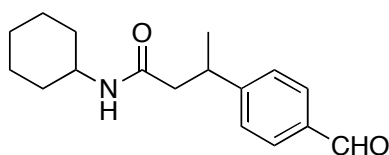

***N*-Cyclohexyl-3-(4-formylphenyl)butanamide.** According to the general procedure using 4-chlorobenzaldehyde on a 0.25 mmol scale, the product was obtained in 66% yield (45.1 mg, 0.16 mmol) as a white crystalline solid after silica gel column chromatography (elution with hexane/EtOAc 3:2). mp: 110-111 °C. <sup>1</sup>H NMR (500 MHz, CDCl<sub>3</sub>): δ 9.98 (s, 1H), 7.81-7.83 (d, *J* = 8.1 Hz, 2H), 7.39-7.40 (d, *J* = 8.1 Hz, 2H), 5.08 (s, 1H), 3.64-3.72 (m, 1H), 3.37-3.43 (m, 1H), 2.35-2.43 (m, 2H), 1.82-1.84 (m, 1H), 1.57-1.67 (m, 4H), 1.24-1.36 (m, 5H), 0.98-1.13 (m, 2H), 0.83-0.91 (m, 1H). <sup>13</sup>C-NMR (125.8 MHz, CDCl<sub>3</sub>): δ 192.1, 170.0, 153.4, 135.1, 130.2, 127.8, 48.2, 45.7, 37.4, 33.3, 33.1, 25.6, 24.9, 24.8, 21.4; IR (neat) 3293, 3068, 2930, 2854, 1702, 1639, 1607, 1546, 1214, 1170 cm<sup>-1</sup>; HRMS (ESI) calcd. for C<sub>17</sub>H<sub>24</sub>NO<sub>2</sub> [M+H]<sup>+</sup> 274.1807, found 274.1806.

The title compound was also prepared according to the general procedure using 4-bromobenzaldehyde (68.8 mg, 0.25 mmol) and was isolated as a white crystalline solid in 46% yield (31.1 mg, 0.11 mmol) with spectral data in accordance with data listed above.

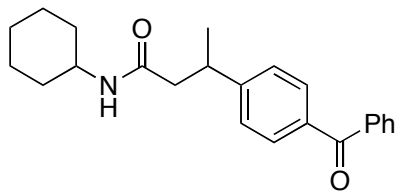

**3-(4-Benzoylphenyl)-N-cyclohexylbutanamide.** According to the general procedure using 4-chlorobenzophenone on a 0.25 mmol scale, the product was obtained in 72% yield (63.3 mg, 0.18 mmol) as an off-white solid after silica gel column chromatography (gradient elution with hexane/EtOAc 4:1 to 3:2). mp: 119-121 °C. <sup>1</sup>H NMR (500 MHz, CDCl<sub>3</sub>): δ 7.75-7.79 (m, 4H), 7.57-7.60 (m, 1H), 7.46-7.49 (t, *J* = 7.7 Hz, 2H), 7.33-7.35 (d, *J* = 8.2 Hz, 2H), 5.09-5.11 (d, *J* = 7.9 Hz, 1H), 3.67-3.73 (m, 1H), 3.38-3.42 (m, 1H), 2.37-2.44 (m, 2H), 1.84-1.85 (m, 1H), 1.56-1.70 (m, 4H), 1.34-1.36 (d, *J* = 7.0 Hz, 3H), 1.25-1.31 (m, 2H), 1.00-1.11 (m, 2H), 0.87-0.93 (m, 1H). <sup>13</sup>C NMR (125.8 MHz, CDCl<sub>3</sub>): δ 196.5, 170.2, 151.1, 137.9, 135.9, 132.4, 130.6, 130.1, 128.4, 127.0, 48.1, 48.5, 37.3, 33.2, 33.2, 25.6, 24.9, 24.9, 21.5; IR (neat) 3295, 3064, 2930, 2854, 1642, 1606, 1546, 1280 cm<sup>-1</sup>; HRMS (ESI) calcd. for C<sub>23</sub>H<sub>28</sub>NO<sub>2</sub> [M+H]<sup>+</sup> 350.2120, found 350.2119.

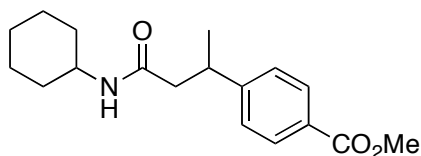

**Methyl 4-(4-(Cyclohexylamino)-4-oxobutan-2-yl)benzoate.** According to the general procedure using methyl 4-bromobenzoate on a 0.25 mmol scale, the product was obtained in 92% yield (69.8 mg, 0.23 mmol) as a white solid after silica gel column chromatography (elution with hexane/EtOAc 3:2). mp: 138-139 °C. <sup>1</sup>H NMR (500 MHz, CDCl<sub>3</sub>): δ 7.95-7.97 (d, *J* = 8.3 Hz, 2H), 7.28-7.30 (d, *J* = 8.3 Hz, 2H), 5.10-5.11 (d, *J* = 7.6 Hz, 1H), 3.90 (s, 3H), 3.65-3.70 (m, 1H), 3.32-3.39 (m, 1H), 2.36-2.39 (dd, *J* = 11.2, 4.0 Hz, 2H), 1.81-1.83 (m, 1H), 1.56-1.67 (m, 4H), 1.24-1.35 (m, 5H), 0.83-1.12 (m, 3H).

$^{13}\text{C}$  NMR (125.8 MHz,  $\text{CDCl}_3$ ):  $\delta$  170.2, 167.2, 151.5, 130.0, 128.5, 127.1, 52.2, 48.1, 45.8, 37.2, 33.2, 33.1, 25.6, 24.9, 24.8, 21.5; IR (neat) 3276, 3085, 2922, 2856, 1719, 1634, 1555, 1282  $\text{cm}^{-1}$ ; HRMS (ESI) calcd. for  $\text{C}_{18}\text{H}_{26}\text{NO}_3$   $[\text{M}+\text{H}]^+$  304.1913, found 304.1922.

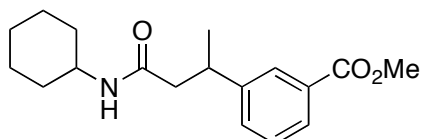

**Methyl 3-(4-(Cyclohexylamino)-4-oxobutan-2-yl)benzoate.** According to the general procedure using methyl 3-chlorobenzoate on a 0.25 mmol scale, the product was obtained in 83% yield (63.1 mg, 0.21 mmol) as a white solid after silica gel column chromatography (elution with hexane/EtOAc 4:1). mp: 95-97  $^{\circ}\text{C}$ .  $^1\text{H}$  NMR (500 MHz,  $\text{CDCl}_3$ ):  $\delta$  7.86-7.89 (m, 2H), 7.41-7.42 (d,  $J = 7.7$  Hz, 1H), 7.33-7.36 (t,  $J = 7.6$  Hz, 1H), 5.13-5.15 (d,  $J = 7.6$  Hz, 1H), 3.90 (s, 3H), 3.63-3.70 (dtt,  $J = 12.1, 8.1, 3.9$  Hz, 1H), 3.31-3.38 (m, 1H), 2.34-2.41 (m, 2H), 1.80-1.82 (m, 1H), 1.54-1.66 (m, 4H), 1.31-1.32 (d,  $J = 7.0$  Hz, 3H), 1.23-1.34 (m, 2H), 0.81-1.11 (m, 3H).  $^{13}\text{C}$  NMR (125.8 MHz,  $\text{CDCl}_3$ ):  $\delta$  170.3, 167.3, 146.4, 132.1, 130.5, 128.7, 127.8, 127.7, 52.2, 48.1, 46.0, 37.1, 33.2, 33.1, 25.6, 24.9, 24.8, 21.6; IR (neat) 3291, 3065, 2931, 2855, 1725, 1640, 1548, 1288  $\text{cm}^{-1}$ ; HRMS (ESI) calcd. for  $\text{C}_{18}\text{H}_{26}\text{NO}_3$   $[\text{M}+\text{H}]^+$  304.1913, found 304.1907.

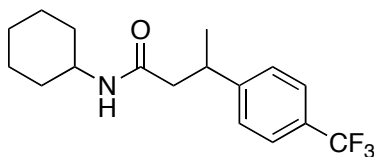

**N-Cyclohexyl-3-(4-(trifluoromethyl)phenyl)butanamide.** According to the general procedure using 1-chloro-4-trifluoromethylbenzene on a 0.25 mmol scale, the product was obtained in 80% yield (62.9 mg, 0.20 mmol) as a white solid after silica gel column



chromatography (elution with hexane/EtOAc 4:1). mp: 129-130 °C. <sup>1</sup>H NMR (500 MHz, CDCl<sub>3</sub>): δ 7.52-7.54 (d, *J* = 8.1 Hz, 2H), 7.32-7.33 (d, *J* = 8.1 Hz, 2H), 5.19-5.20 (d, *J* = 7.2 Hz, 1H), 3.62-3.72 (m, 1H), 3.32-3.41 (m, 1H), 2.31-2.41 (m, 2H), 1.81-1.83 (m, 1H), 1.54-1.63 (m, 4H), 1.30-1.32 (d, *J* = 7.0, 3H), 1.22-1.35 (m, 2H), 0.97-11.14 (m, 2H), 0.82-0.92 (m, 1H). <sup>13</sup>C NMR (125.8 MHz, CDCl<sub>3</sub>): δ 169.9, 149.9, 128.2-129.0 (q, *J* = 33.0 Hz), 127.1, 125.3-125.4 (q, *J* = 4.0 Hz), 120.9-127.4 (q, *J* = 120.9 Hz), 47.9, 45.6, 36.8, 33.0, 32.8, 25.3, 24.6, 24.6, 21.2; IR (neat) 3293, 3070, 2921, 2855, 1635, 1551, 1333, 1118 cm<sup>-1</sup>; HRMS (CI) calcd. for C<sub>17</sub>H<sub>22</sub>NOF<sub>2</sub> [M-F]<sup>+</sup> 294.1669, found 294.1660.

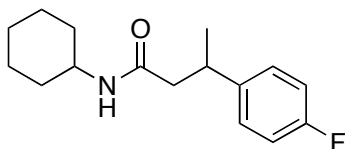

***N*-Cyclohexyl-3-(4-fluorophenyl)butanamide.** According to the general procedure using methyl 4-chlorofluorobenzene on a 0.25 mmol scale, the product was obtained in 92% yield (60.5 mg, 0.23 mmol) as a white crystalline solid after silica gel column chromatography (elution with hexane/EtOAc 4:1). mp: 95-97 °C. <sup>1</sup>H NMR (500 MHz, CDCl<sub>3</sub>): δ 7.15-7.18 (dd, *J* = 8.5, 5.5 Hz, 2H), 6.94-6.97 (apparent t, *J* = 8.6 Hz, 2H), 5.15-5.17 (d, *J* = 6.7 Hz, 1H), 3.63-3.69 (m, 1H), 3.24-3.29 (m, 1H), 2.28-2.34 (qd, *J* = 13.7, 7.5 Hz, 2H), 1.80-1.82 (m, 1H), 1.53-1.67 (m, 4H), 1.26-1.28 (d, *J* = 7.0 Hz, 3H), 1.25-1.33 (m, 2H), 0.97-1.12 (m, 2H), 0.84-0.91 (m, 1H). <sup>13</sup>C NMR (125.8 MHz, CDCl<sub>3</sub>): δ 170.5, 160.6-162.5 (d, *J* = 244 Hz), 141.7 (d, *J* = 3.77 Hz), 128.3-128.4 (d, *J* = 8.81 Hz), 115.2-115.4 (d, *J* = 21.4 Hz), 48.0, 46.4, 36.5, 33.2, 33.1, 25.6, 24.9, 24.8, 21.8; IR (neat) 3289, 3072, 2931, 2855, 1638, 1551, 1511, 1224 cm<sup>-1</sup>; HRMS (CI) calcd. for C<sub>16</sub>H<sub>23</sub>NOF [M+H]<sup>+</sup> 264.1764, found 264.1758.

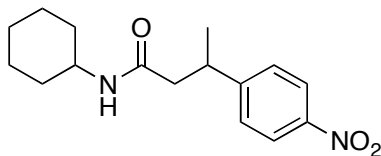

***N*-Cyclohexyl-3-(4-nitrophenyl)butanamide.** According to the general procedure using methyl 4-chloronitrobenzene, SPhos, and Cs<sub>2</sub>CO<sub>3</sub> on a 0.25 mmol scale, the product was obtained in 71% yield (51.7 mg, 0.18 mmol) as a white crystalline solid after silica gel column chromatography (gradient elution with hexane/EtOAc 4:1 to 3:2). mp: 119-120 °C. <sup>1</sup>H NMR (500 MHz, CDCl<sub>3</sub>): δ 8.15-8.16 (d, *J* = 8.8 Hz, 2H), 7.38-7.40 (d, *J* = 8.8 Hz, 2H), 5.11-5.13 (d, *J* = 7.1 Hz, 1H), 3.65-3.71 (dtt, *J* = 12.0, 8.1, 3.9 Hz, 1H), 3.44-3.48 (m, 1H), 2.34-2.44 (qd, *J* = 14.1, 7.5 Hz, 2H), 1.84-1.86 (m, 1H), 1.58-1.70 (m, 4H), 1.33-1.34 (d, *J* = 7.0 Hz, 3H), 1.25-1.36 (m, 2H), 0.88-1.11 (m, 3H). <sup>13</sup>C NMR (125.8 MHz, CDCl<sub>3</sub>): δ 169.7, 153.9, 146.7, 127.9, 123.9, 48.3, 45.5, 37.0, 33.3, 33.2, 25.6, 24.9, 24.8, 21.3; IR (neat) 3399, 3291, 3078, 2932, 2855, 1640, 1520, 1347 cm<sup>-1</sup>; HRMS (CI) calcd. for C<sub>16</sub>H<sub>23</sub>N<sub>2</sub>O<sub>3</sub> [M+H]<sup>+</sup> 291.1709, found 291.1714.

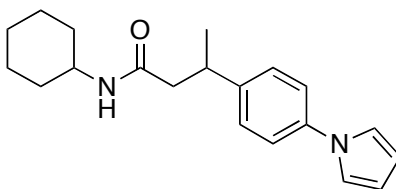

**3-(4-(1*H*-Pyrrol-1-yl)phenyl)-*N*-cyclohexylbutanamide.** According to the general procedure using potassium *N*-cyclohexyl-3-(trifluoroborato)butanamide and condition A on a 0.25 mmol scale, the product was obtained in 84% yield (65.1 mg, 0.21 mmol) as an off-white solid after silica gel column chromatography (elution with hexane/EtOAc 1:1). mp: 155-156 °C. <sup>1</sup>H NMR (500 MHz, CDCl<sub>3</sub>): δ 7.31-7.33 (d, *J* = 8.5 Hz, 2H), 7.27-7.28 (d, *J* = 8.5 Hz, 2H), 7.05 (m, 2H), 6.33-6.34 (m, 2H), 5.04-5.05 (d, *J* = 7.4 Hz, 1H), 3.65-3.74 (m, 1H), 3.30-3.35 (m, 1H), 2.34-2.42 (m, 2H), 1.81-1.82 (m, 1H), 1.56-1.66 (m,

4H), 1.31-1.32 (d,  $J = 7.0$  Hz, 3H), 1.26-1.34 (m, 2H), 0.87-1.14 (m, 3H).  $^{13}\text{C}$  NMR (125.8 MHz,  $\text{CDCl}_3$ ):  $\delta$  170.2, 143.3, 139.1, 127.8, 120.6, 119.3, 110.1, 47.8, 46.1, 36.5, 33.0, 32.9, 25.4, 24.6, 24.6, 21.5; IR (neat) 3289, 2930, 2848, 1636, 1548, 1526  $\text{cm}^{-1}$ ; HRMS (ESI) calcd. for  $\text{C}_{20}\text{H}_{27}\text{N}_2\text{O}$   $[\text{M}+\text{H}]^+$  311.2123, found 311.2116.

The title compound was also prepared according to the general procedure using condition B and was isolated as a pale yellow solid in 89% yield (69.4 mg, 0.22 mmol) with spectral data in accordance with data listed above.

The title compound was also prepared according to the general procedure using condition C and was isolated as a pale yellow solid in 78% yield (60.9 mg, 0.20 mmol) with spectral data in accordance with data listed above.

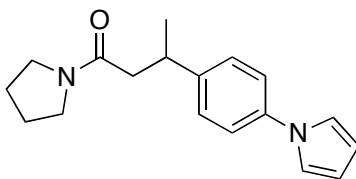

**3-(4-(1H-Pyrrol-1-yl)phenyl)-1-(pyrrolidin-1-yl)butan-1-one.** According to the general procedure using potassium 1-(pyrrolidin-1-yl)-3-(trifluoroborato)butan-1-one and condition A on a 0.25 mmol scale, the product was obtained in 92% yield (65.1 mg, 0.23 mmol) as a light yellow oil after silica gel column chromatography (elution with hexane/EtOAc 7:3).  $^1\text{H}$  NMR (500 MHz,  $\text{CDCl}_3$ ):  $\delta$  7.31 (s, 4H), 7.05-7.06 (m, 2H), 6.32-6.33 (m, 2H), 3.33-3.43 (m, 4H), 3.16-3.21 (m, 1H), 2.47-2.57 (qd,  $J = 14.9, 7.2$  Hz, 2H), 1.75-1.90 (m, 4H), 1.35-1.36 (d,  $J = 7.0$  Hz, 3H).  $^{13}\text{C}$  NMR (125.8 MHz,  $\text{CDCl}_3$ ):  $\delta$  170.3, 144.1, 139.2, 128.1, 120.7, 119.5, 110.3, 46.9, 45.8, 43.6, 36.0, 26.2, 24.5, 21.7; IR (neat) 3132, 3101, 2967, 2873, 1634, 1523, 1434, 1328  $\text{cm}^{-1}$ ; HRMS (ESI) calcd. for  $\text{C}_{18}\text{H}_{23}\text{N}_2\text{O}$   $[\text{M}+\text{H}]^+$  283.1810, found 283.1817.

The title compound was also prepared according to the general procedure using condition B and was isolated as a light yellow oil in 84% yield (59.5 mg, 0.21 mmol) with spectral data in accordance with data listed above.

The title compound was also prepared according to the general procedure using condition C and was isolated as a light yellow oil in 93% yield (65.8 mg, 0.23 mmol) with spectral data in accordance with data listed above.

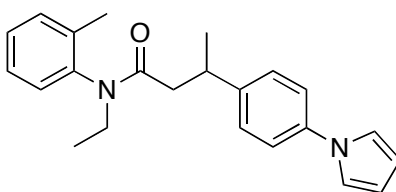

**3-(4-(1H-Pyrrol-1-yl)phenyl)-N-ethyl-N-(o-tolyl)butanamide.** According to the general procedure using potassium *N*-ethyl-*N*-(*o*-tolyl)-3-(trifluoroborato)butanamide and condition A on a 0.25 mmol scale, the product was obtained in 87% yield (75.8 mg, 0.22 mmol) as a pale yellow solid after silica gel column chromatography (elution with hexane/EtOAc 4:1). mp: 89-91 °C. <sup>1</sup>H NMR (500 MHz, asterisk denotes minor rotamer peaks, CDCl<sub>3</sub>): δ 7.02-7.29 (m, 10H), 6.51-6.52\* (m, 1H), 6.33-6.34 (m, 2H), 6.31-6.32\* (m, 2H), 4.08-4.15\* (m, 1H), 4.01-4.07 (m, 1H), 3.39-3.46 (m, 1H), 3.07-3.20 (m, 1H), 2.07-2.24 (m, 2H), 2.21 (s, 3H), 1.94\* (s, 3H), 1.21-1.23 (m, 3H), 1.09-1.12\* (t, *J* = 7.1 Hz, 3H), 1.01-1.04\* (t, *J* = 7.1 Hz, 3H). <sup>13</sup>C NMR (125.8 MHz, asterisk denotes rotamer peaks, CDCl<sub>3</sub>): δ 171.3, 171.2\*, 144.3, 143.9\*, 141.0, 141.0\*, 139.2, 139.2\*, 136.2, 135.9\*, 131.7, 131.5\*, 129.7, 129.5\*, 128.5, 128.4\*, 128.4, 128.2\*, 127.2, 127.1\*, 120.8, 120.6\*, 119.6, 110.4, 110.3\*, 43.3, 43.2\*, 43.0, 42.9\*, 36.2, 35.9\*, 21.7, 21.6\*, 17.8, 17.5\*, 13.1, 13.0\*; IR (neat) 3039, 2966, 2920, 2863, 1652, 1523, 1404, 1329 cm<sup>-1</sup>;

HRMS (ESI) calcd. for  $C_{23}H_{26}N_2ONa$   $[M+Na]^+$  369.1943, found 369.1931.

The title compound was also prepared according to the general procedure using condition B and was isolated as a pale yellow solid in 99% yield (85.5 mg, 0.25 mmol) with spectral data in accordance with data listed above.

The title compound was also prepared according to the general procedure using condition C and was isolated as a pale yellow solid in 98% yield (85.1 mg, 0.25 mmol) with spectral data in accordance with data listed above.

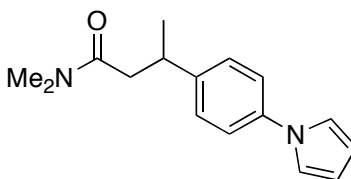

**3-(4-(1H-Pyrrol-1-yl)phenyl)-N,N-dimethylbutanamide.** According to the general procedure using potassium *N,N*-dimethyl-3-(trifluoroborato)butanamide and condition A on a 0.25 mmol scale, the product was obtained in 72% yield (46.3 mg, 0.18 mmol) as a tan solid after silica gel column chromatography (elution with hexane/EtOAc 4:1). mp: 47-49 °C.  $^1H$  NMR (500 MHz,  $CDCl_3$ ):  $\delta$  7.29-7.33 (m, 4H), 7.06-7.07 (m, 2H), 6.33-6.34 (m, 2H), 3.38-3.45 (m, 1H), 2.92 (s, 3H), 2.91 (s, 3H), 2.61-2.65 (dd,  $J = 15.1, 6.6$  Hz, 1H), 2.51-2.56 (dd,  $J = 15.2, 7.6$  Hz, 1H), 1.34-1.35 (d,  $J = 7.0$  Hz, 3H).  $^{13}C$  NMR (125.8 MHz,  $CDCl_3$ ):  $\delta$  171.7, 144.3, 139.3, 128.2, 120.8, 119.5, 110.4, 42.0, 37.5, 36.1, 35.7, 22.0; IR (neat) 3101, 3039, 2957, 2930, 2863, 1644, 1523, 1398, 1329  $cm^{-1}$ ; HRMS (ESI) calcd. for  $C_{16}H_{21}N_2O$   $[M+H]^+$  257.1654, found 257.1644.

The title compound was also prepared according to the general procedure using condition B and was isolated as a tan solid in 78% yield (50.1 mg, 0.20 mmol) with spectral data in accordance with data listed above.

The title compound was also prepared according to the general procedure using condition C and was isolated as a tan solid in 64% yield (41.1 mg, 0.16 mmol) with spectral data in accordance with data listed above.

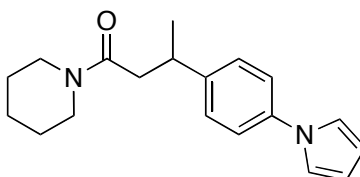

**3-(4-(1H-Pyrrol-1-yl)phenyl)-1-(piperidin-1-yl)butan-1-one.** According to the general procedure using potassium 1-(piperidin-1-yl)-3-(trifluoroborato)butan-1-one and condition A on a 0.25 mmol scale, the product was obtained in 89% yield (65.9 mg, 0.22 mmol) as a light yellow oil after silica gel column chromatography (elution with hexane/EtOAc 7:3). <sup>1</sup>H NMR (500 MHz, CDCl<sub>3</sub>): δ 7.29-7.33 (m, 4H), 7.05-7.06 (m, 2H), 6.33-6.34 (m, 2H), 3.54-3.59 (m, 1H), 3.45-3.50 (m, 1H), 3.27-3.41 (m, 3H), 2.62 (dd, *J* = 14.8, 6.7 Hz, 1H), 2.50-2.55 (dd, *J* = 14.8, 7.7 Hz, 1H), 1.43-1.60 (m, 6H), 1.34-1.36 (d, *J* = 7.0 Hz, 3H). <sup>13</sup>C NMR (125.8 MHz, CDCl<sub>3</sub>): δ 170.0, 144.4, 139.3, 128.2, 120.9, 119.6, 110.4, 47.0, 43.0, 41.8, 36.4, 26.7, 25.8, 24.7, 22.0; IR (neat) 3127, 3096, 2934, 2855, 1637, 1523, 1442, 1329 cm<sup>-1</sup>; HRMS (CI) calcd. for C<sub>19</sub>H<sub>25</sub>N<sub>2</sub>O [M+H]<sup>+</sup> 297.1967, found 297.1955.

The title compound was also prepared according to the general procedure using condition B and was isolated as a light yellow oil in 96% yield (70.9 mg, 0.24 mmol) with spectral data in accordance with data listed above.

The title compound was also prepared according to the general procedure using condition C and was isolated as a light yellow oil in 89% yield (66.1 mg, 0.22 mmol) with spectral data in accordance with data listed above.

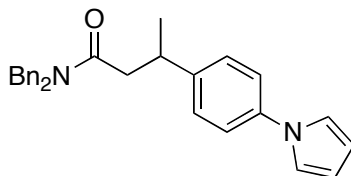

**3-(4-(1H-Pyrrol-1-yl)phenyl)-N,N-dibenzylbutanamide.** According to the general procedure using potassium *N,N*-dibenzyl-3-(trifluoroborato)butanamide and condition A on a 0.25 mmol scale, the product was obtained in 79% yield (80.8 mg, 0.20 mmol) as a pale yellow amorphous solid after silica gel column chromatography (elution with hexane/EtOAc 9:1). <sup>1</sup>H NMR (500 MHz, CDCl<sub>3</sub>): δ 7.24-7.34 (m, 10H), 7.04-7.10 (m, 6H), 6.33-6.34 (m, 2H), 4.63-4.66 (d, *J* = 14.8 Hz, 1H), 4.44-4.47 (d, *J* = 14.8 Hz, 1H), 4.29-4.38 (m, 2H), 3.51-3.58 (m, 1H), 2.72 (dd, *J* = 15.2, 7.6 Hz, 1H), 2.60-2.64 (dd, *J* = 15.2, 6.8 Hz, 1H), 1.33-1.35 (d, *J* = 7.0 Hz, 3H); <sup>13</sup>C NMR (125.8 MHz, CDCl<sub>3</sub>): δ 172.2, 143.8, 139.3, 137.4, 136.6, 129.1, 128.7, 128.4, 128.3, 127.8, 127.5, 126.4, 120.7, 119.5, 110.4, 50.0, 48.4, 41.7, 36.4, 22.0; IR (neat) 3059, 3030, 2962, 1644, 1522, 1451, 1329 cm<sup>-1</sup>; HRMS (ESI) calcd. for C<sub>28</sub>H<sub>28</sub>N<sub>2</sub>ONa [M+Na]<sup>+</sup> 431.2099, found 431.2092.

The title compound was also prepared according to the general procedure using condition B and was isolated as a pale yellow amorphous solid in 91% yield (93.2 mg, 0.23 mmol) with spectral data in accordance with data listed above.

The title compound was also prepared according to the general procedure using condition C and was isolated as a pale yellow amorphous solid in 86% yield (87.9 mg, 0.22 mmol) with spectral data in accordance with data listed above.

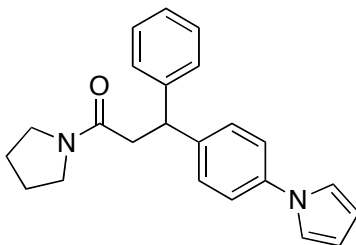

**3-(4-(1*H*-Pyrrol-1-yl)phenyl)-3-phenyl-1-(pyrrolidin-1-yl)propan-1-one.** According to the general procedure using potassium 3-phenyl-1-(pyrrolidin-1-yl)-3-(trifluoroborato)propan-1-one and condition A on a 0.25 mmol scale, the product was obtained in 94% yield (80.9 mg, 0.23 mmol) as a white solid after silica gel column chromatography (elution with 1% MeOH in CH<sub>2</sub>Cl<sub>2</sub>). mp: 97-99 °C. <sup>1</sup>H NMR (500 MHz, CDCl<sub>3</sub>): δ 7.25-7.30 (m, 8H), 7.18-7.21 (t, *J* = 7.0 Hz, 1H), 7.03 (m, 2H), 6.31 (m, 2H), 4.72-4.75 (t, *J* = 7.5 Hz, 1H), 3.37-3.40 (t, *J* = 6.8 Hz, 2H), 3.21-3.29 (m, 2H), 2.95-3.04 (m, 2H), 1.73-1.84 (m, 4H). <sup>13</sup>C NMR (125.8 MHz, CDCl<sub>3</sub>): δ 169.7, 144.3, 142.0, 139.3, 129.2, 128.7, 128.1, 126.7, 120.7, 119.5, 110.4, 46.8, 46.5, 45.8, 41.2, 26.2, 24.5; IR (neat) 3054, 3023, 2971, 2873, 1638, 1521, 1434, 1329 cm<sup>-1</sup>; HRMS (ESI) calcd. for C<sub>23</sub>H<sub>25</sub>N<sub>2</sub>O [M+H]<sup>+</sup> 345.1967, found 345.1971.

The title compound was also prepared according to the general procedure using condition B and was isolated as a white solid in 79% yield (67.8 mg, 0.20 mmol) with spectral data in accordance with data listed above.

The title compound was also prepared according to the general procedure using condition C and was isolated as an off-white solid in 89% yield (76.7 mg, 0.22 mmol) with spectral data in accordance with data listed above.



## Determination of Absolute Configuration and Enantiomeric Ratio of Enantioenriched Cross-Coupled Products:

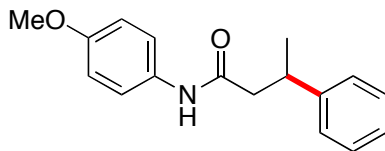

***N*-(4-Methoxyphenyl)-3-phenylbutanamide.** Using the general procedure described for the Suzuki-Miyaura cross-coupling of  $\beta$ -trifluoroboratoamides using potassium *N*-(4-methoxyphenyl)-3-(trifluoroborato)butanamide and chlorobenzene under condition A on 0.25 mmol scale, the title compound was obtained in 84% yield as an off-white solid after silica gel column chromatography (elution with hexane/EtOAc 4:1). mp: 125-127 °C.  $^1\text{H}$  NMR (500 MHz,  $\text{CDCl}_3$ ):  $\delta$  7.30-7.31 (t,  $J = 7.5$  Hz, 2H), 7.20-7.26 (m, 5H), 6.96 (br s, 1H), 6.77-6.80 (d,  $J = 9.0$  Hz, 2H), 3.75 (s, 3H), 3.34-3.38 (m, 1H), 2.52-2.61 (qd,  $J = 14.0, 7.4$  Hz, 2H), 1.35-1.37 (d,  $J = 7.0$  Hz, 3H);  $^{13}\text{C}$  NMR (125.8 MHz,  $\text{CDCl}_3$ ):  $\delta$  170.1, 156.6, 145.9, 131.0, 128.9, 127.0, 126.8, 122.2, 114.3, 55.7, 46.8, 37.3, 21.9; IR (neat) 3289, 3062, 2961, 2931, 1652, 1604, 1538, 1513, 1246  $\text{cm}^{-1}$ ; HRMS (ESI) calcd. for  $\text{C}_{17}\text{H}_{19}\text{NO}_2\text{Na}$   $[\text{M}+\text{Na}]^+$  292.1313, found 292.1309. Using the racemate of this material, a method for enantiomer separation was attained using SFC analysis (Column OJ-H, 10% *i*-PrOH, 4 mL, 12 MPa).

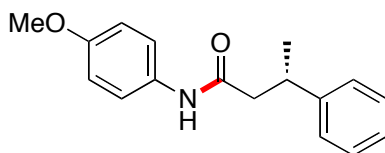

***(S)*-*N*-(4-Methoxyphenyl)-3-phenylbutanamide.** A dry flask was purged with  $\text{N}_2$  and charged with (*S*)-3-phenylbutyric acid (41.1 mg, 0.25 mmol, 1.0 equiv) and  $\text{CH}_2\text{Cl}_2$  (2.5 mL), and the reaction vessel was cooled to 0 °C. To the reaction mixture was added *i*-

Pr<sub>2</sub>NEt (153 μL, 0.88 mmol, 3.5 equiv), HATU (114 mg, 0.30 mmol, 1.2 equiv), and *p*-anisidine (33.9 mg, 0.28 mmol, 1.1 equiv). Following the addition of reagents, the reaction mixture was allowed to warm to rt and to stir overnight. The title compound was obtained in 84% yield (56.8 mg, 0.21 mmol) as a white crystalline solid after silica gel column chromatography (elution with hexanes/EtOAc 4:1) with spectral data in accordance with that obtained via the cross-coupling reaction described above.  $[\alpha]_D^{20} = +64.7$  (*c* = 0.2, MeOH). Using SFC analysis, co-injection of the racemate described above with the title compound provided absolute configuration identity to the enantiomer peaks. [(*S*)-isomer *t<sub>r</sub>* = 5.3 min and (*R*)-isomer *t<sub>r</sub>* = 6.1 min].

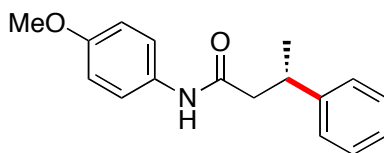

**(*S*)-*N*-(4-Methoxyphenyl)-3-phenylbutanamide.** Using the general procedure described for the Suzuki-Miyaura cross-coupling of β-trifluoroboratoamides using potassium (*R*)-*N*-(4-methoxyphenyl)-3-(trifluoroborato)butanamide and chlorobenzene under condition A on a 0.25 mmol scale, the title compound was obtained as an off-white solid in 82% yield (55.1 mg, 0.21 mmol) with spectral data in accordance with that described for the racemate. The title compound was found to have an enantiomeric ratio of 93:7 with an absolute configuration of *S* for the major enantiomer using SFC analysis.  $[\alpha]_D^{20} = +46.8$  (*c* = 0.2, MeOH).

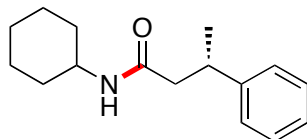

**(S)-N-Cyclohexyl-3-phenylbutanamide.** Using cyclohexylamine and (S)-3-phenylbutyric acid and the procedure described above for the preparation of (S)-N-(4-methoxyphenyl)-3-phenylbutanamide on a 0.25 mmol scale, the title compound was prepared in 79% yield (48.5 mg, 0.20 mmol) with spectral data in accordance with that obtained via the cross-coupling reaction described above.  $[\alpha]_D^{20} = +35.0$  ( $c = 0.2$ , MeOH). Using the racemate of this material, a method for enantiomer separation was attained using HPLC analysis (Column AS-H, 6% *i*-PrOH, 0.5 mL). Co-injection of the racemate with the title compound provided absolute configuration identity to the enantiomer peaks. [(S)-isomer  $t_r = 81.2$  min and (R)-isomer  $t_r = 74.5$  min].

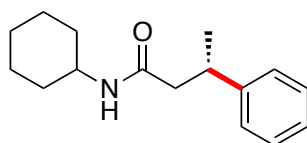

**(S)-N-Cyclohexyl-3-phenylbutanamide.** Using the general procedure described for the Suzuki-Miyaura cross-coupling of  $\beta$ -trifluoroboratoamides using potassium (R)-N-cyclohexyl-3-(trifluoroborato)butanamide and chlorobenzene under condition B on 0.25 mmol scale, the title compound was obtained as a white solid in 96% yield (58.9 mg, 0.24 mmol) with spectral data in accordance with that described for the racemate. The title compound was found to have an enantiomeric ratio of 92:8 with an absolute configuration of *S* for the major enantiomer using HPLC analysis.  $[\alpha]_D^{20} = +29.7$  ( $c = 0.2$ , MeOH).

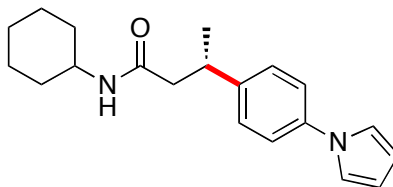

**(S)-3-(4-(1*H*-Pyrrol-1-yl)phenyl)-*N*-cyclohexylbutanamide.** Using the general procedure described for the Suzuki-Miyaura cross-coupling of  $\beta$ -trifluoroboratoamides using potassium (*R*)-*N*-cyclohexyl-3-(trifluoroborato)butanamide and chlorobenzene under condition B on a 0.25 mmol scale, the title compound was obtained as a white solid in 91% yield (70.8, 0.23 mmol) with spectral data in accordance with that described for the racemate. The title compound was found to have an enantiomeric ratio of 92:8 assumed to have an absolute configuration of *S* for the major enantiomer using HPLC analysis [Column AS-H, 10% *i*-PrOH, 1.0 mL; (*S*)-isomer  $t_r = 37.3$  min and (*R*)-isomer  $t_r = 27.4$  min].  $[\alpha]_D^{20} = +33.1$  ( $c = 0.2$ , MeOH). This assumption was made on the basis that we and Yun and coworkers<sup>8a</sup> both observed that (*R*)-(*S*)-Josiphos provides this enantiomer in the borylation of  $\alpha,\beta$ -unsaturated amides.

## Chromatograms:

**Analysis of 3-Hydroxy-N-(4-Methoxyphenyl)butanamide using SFC.** Analysis was performed using Column OD-H, 8% *i*-PrOH, 4 mL, 12MPa. (*S*)-isomer  $t_r = 4.9$  min and (*R*)-isomer  $t_r = 5.5$  min.

### Chromatogram of oxidized racemic borylation product:

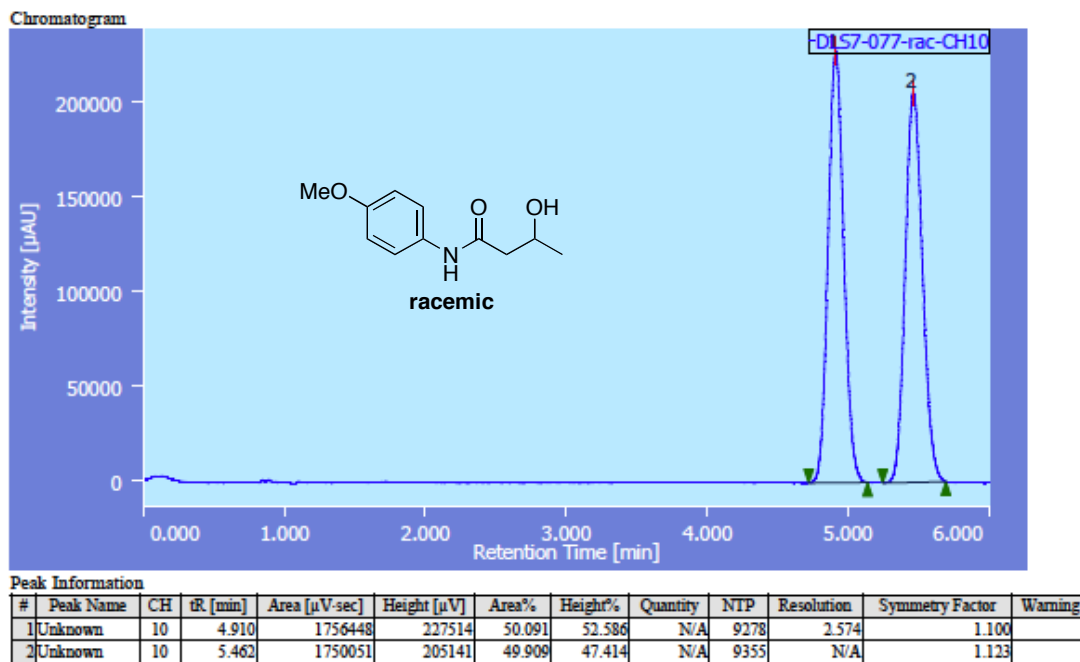

### Chromatogram of oxidized enantioenriched borylation product:

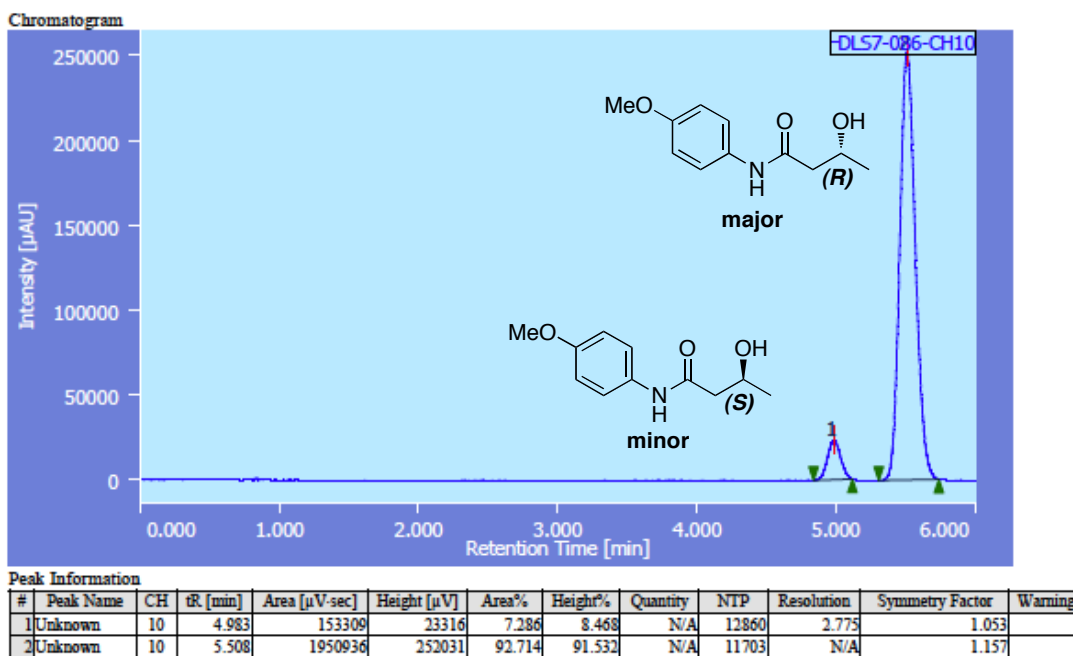

**Analysis of *N*-(4-methoxyphenyl)-3-phenylbutanamide using SFC.** Analysis was performed using Column OJ-H, 10% *i*-PrOH, 4 mL, 12 MPa.. (*S*)-isomer  $t_r = 5.3$  min and (*R*)-isomer  $t_r = 6.1$  min.

**Chromatogram of racemic cross-coupled product:**

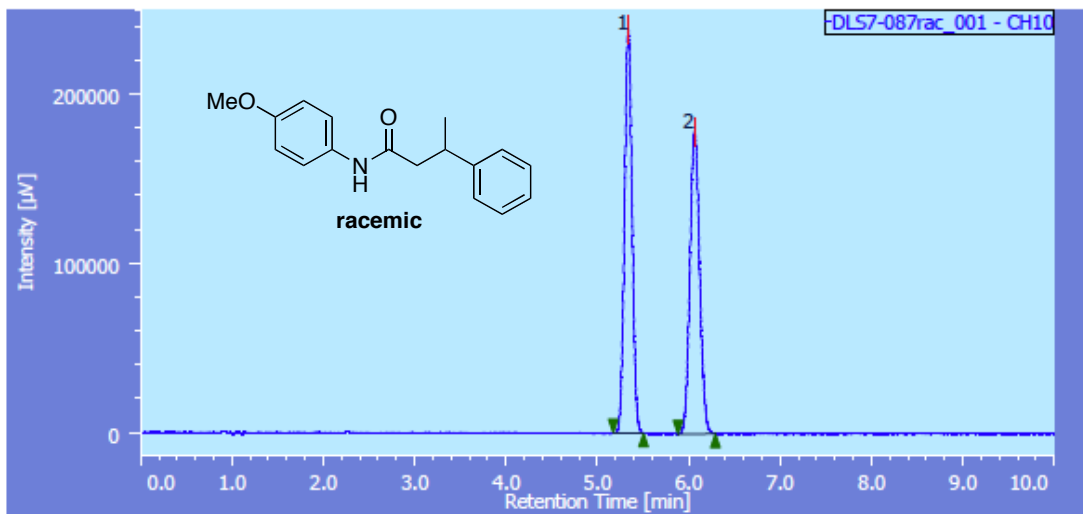

| # | Peak Name | CH | tR [min] | Area [ $\mu\text{V}\cdot\text{sec}$ ] | Height [ $\mu\text{V}$ ] | Area%  | Height% | Quantity | NTP   | Resolution | Symmetry Factor | Warning |
|---|-----------|----|----------|---------------------------------------|--------------------------|--------|---------|----------|-------|------------|-----------------|---------|
| 1 | Unknown   | 10 | 5.337    | 1387751                               | 238202                   | 51.208 | 57.171  | N/A      | 19167 | 4.158      | 1.036           |         |
| 2 | Unknown   | 10 | 6.063    | 1322277                               | 178450                   | 48.792 | 42.829  | N/A      | 15268 | N/A        | 1.074           |         |

**Chromatogram of cross-coupled product from enantioenriched trifluoroborate:**

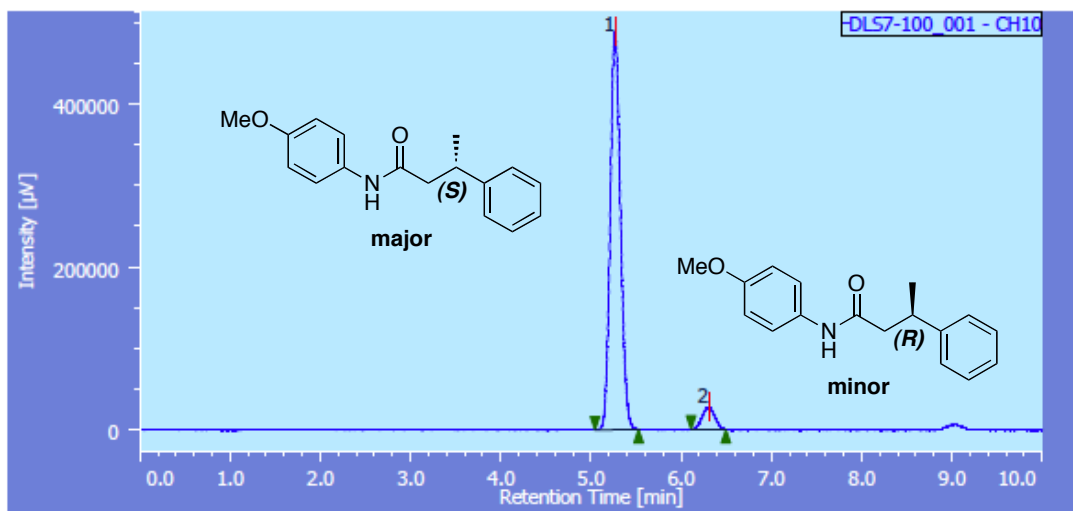

| # | Peak Name | CH | tR [min] | Area [ $\mu\text{V}\cdot\text{sec}$ ] | Height [ $\mu\text{V}$ ] | Area%  | Height% | Quantity | NTP   | Resolution | Symmetry Factor | Warning |
|---|-----------|----|----------|---------------------------------------|--------------------------|--------|---------|----------|-------|------------|-----------------|---------|
| 1 | Unknown   | 10 | 5.265    | 3862590                               | 488998                   | 93.433 | 94.656  | N/A      | 10214 | 4.411      | 1.120           |         |
| 2 | Unknown   | 10 | 6.305    | 271492                                | 27606                    | 6.567  | 5.344   | N/A      | 9099  | N/A        | 0.980           |         |

**Analysis of 3-(benzyloxy)-N-cyclohexylbutanamide using chiral HPLC.** Analysis was performed using Column AS-H, 5% *i*-PrOH, 0.7 mL. (*S*)-isomer  $t_r = 47.2$  min and (*R*)-isomer  $t_r = 42.3$  min.

**Chromatogram of oxidized/benzylated racemic borylated product:**

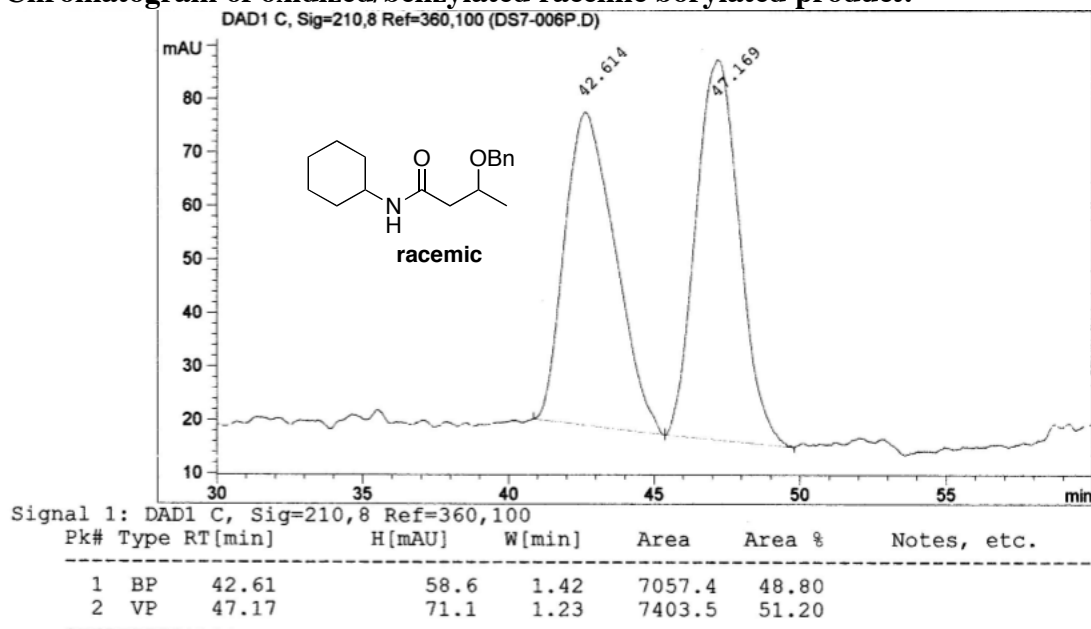

**Chromatogram of oxidized/benzylated enantioenriched borylated product:**

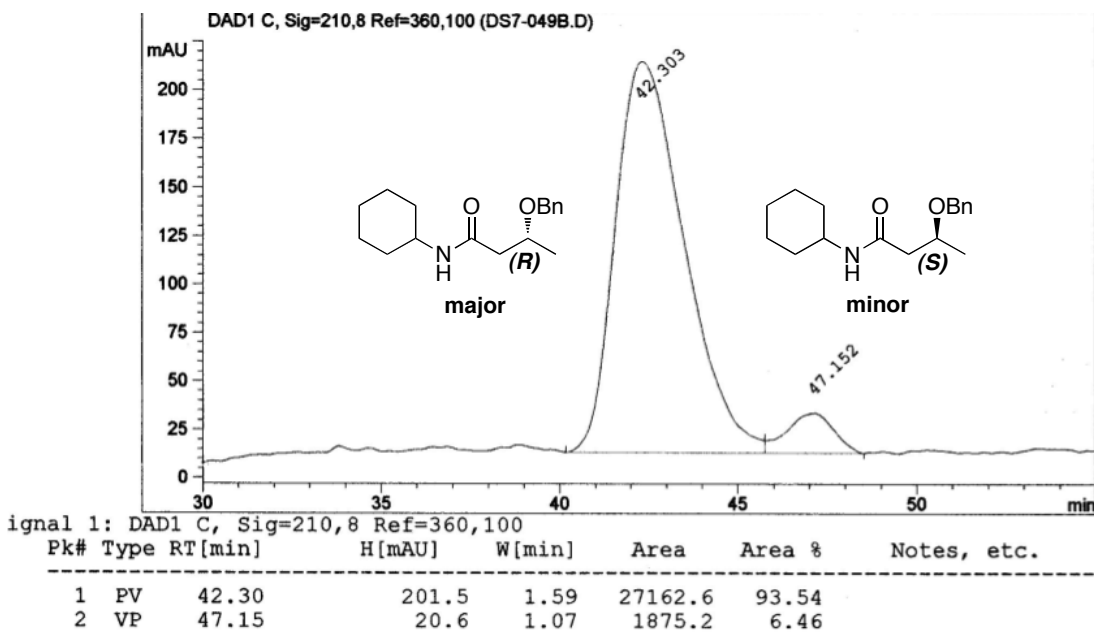

Analysis of 3-(4-(1*H*-pyrrol-1-yl)phenyl)-*N*-cyclohexylbutanamide using chiral HPLC. Analysis was performed using Column AS-H, 10% *i*-PrOH, 1.0 mL. (*S*)-isomer  $t_r = 37.3$  min and (*R*)-isomer  $t_r = 27.4$  min.

**Chromatogram of racemic cross-coupled product:**

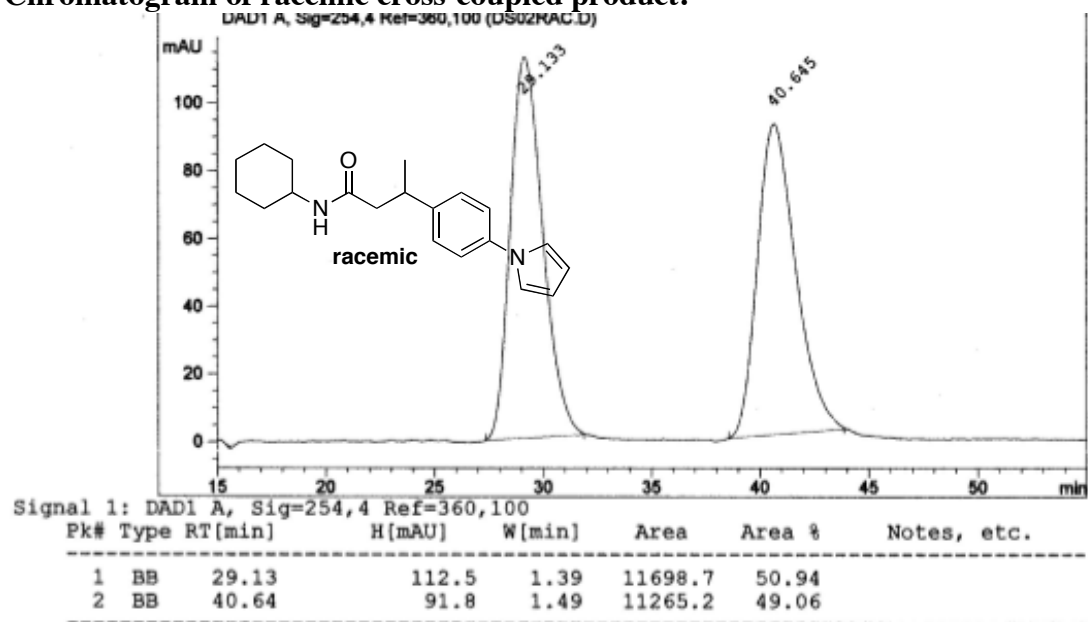

**Chromatogram of cross-coupled product from enantioenriched trifluoroborate:**

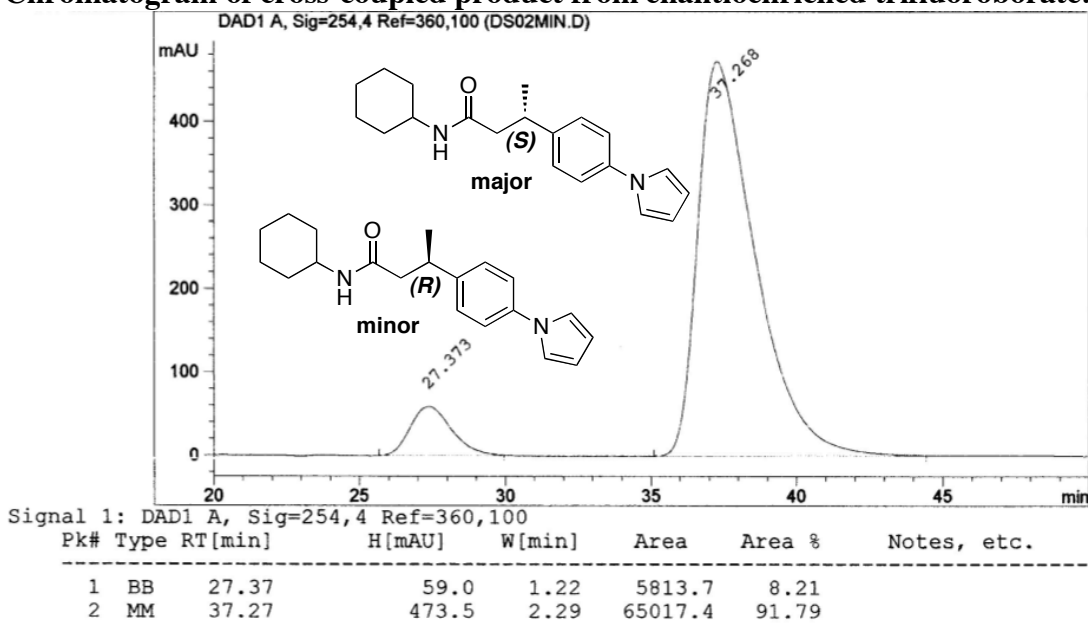



**Analysis of *N*-cyclohexyl-3-(*p*-tolyl)butanamide using chiral HPLC.** Analysis was performed using Column AS-H, 6% *i*-PrOH, 0.5 mL. (*S*)-isomer  $t_r = 81.2$  min and (*R*)-isomer  $t_r = 74.5$  min.

**Chromatogram of racemic cross-coupled product:**

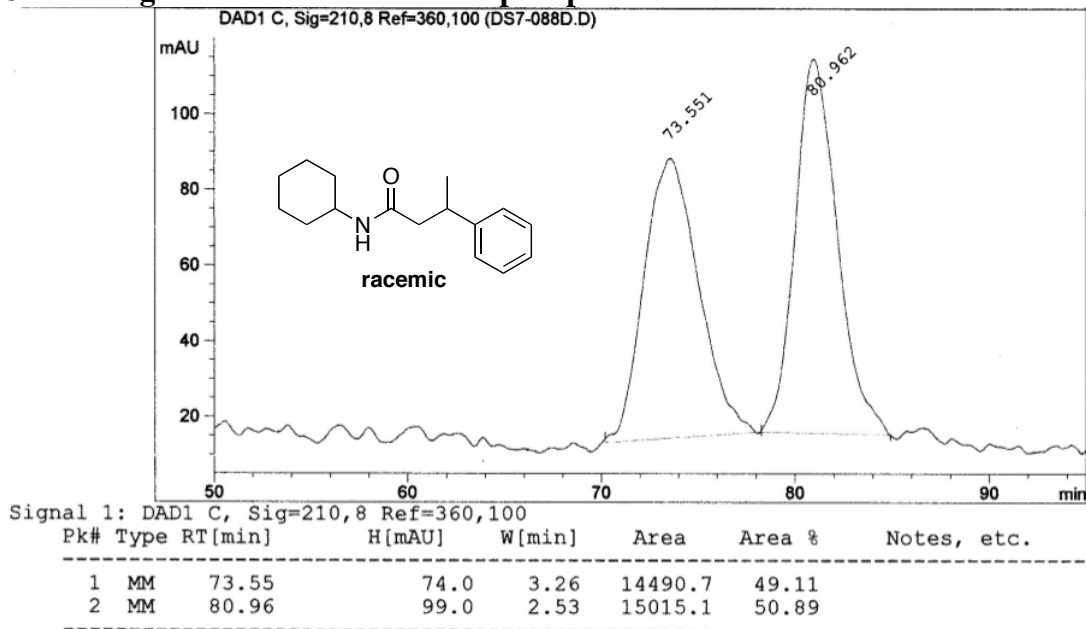

**Chromatogram of cross-coupled product from enantioenriched trifluoroborate:**

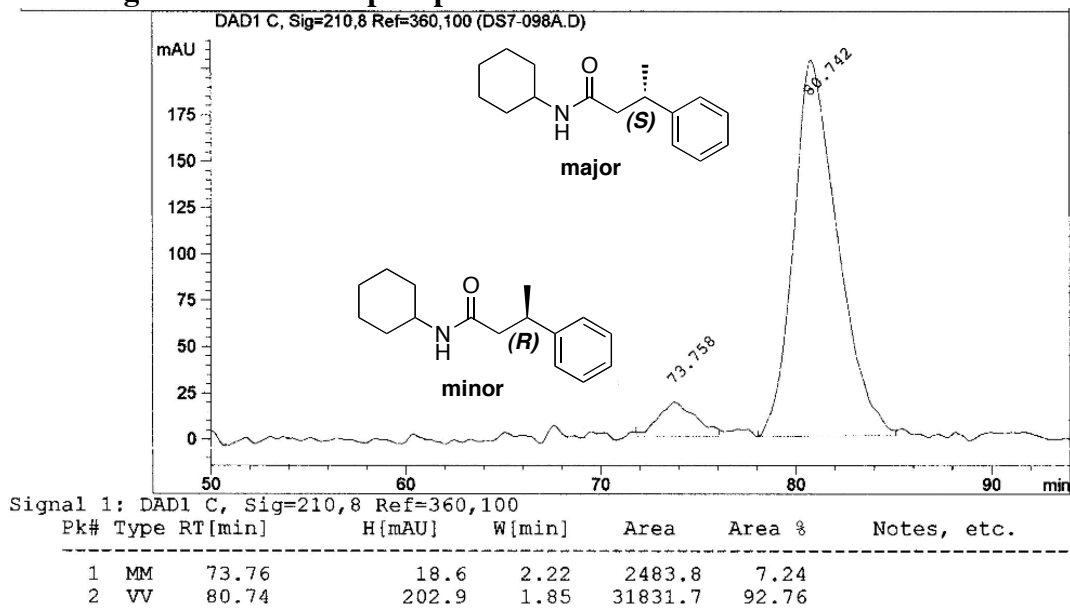

## References and Notes

- 1) Still, W. C.; Kahn, M.; Mitra, A. *J. Org. Chem.* **1978**, *43*, 2923-2925.
- 2) Jeddelloh, M. R.; Holden, J. B.; Nouri, D. H.; Kurth, M. J. *J. Comb. Chem.* **2007**, *9*, 1041.
- 3) Biswas, K.; Woodward, S. *Tetrahedron: Asymmetry* **2008**, *19*, 1702.
- 4) Gao, Y.; Lam, Y. *Adv. Synth. Catal.* **2008**, *350*, 2937.
- 5) Meth-Cohn, O.; Moore, C.; Taljaard, H. C. *J. Chem. Soc., Perkin Trans. 1*, **1988**, 2663.
- 6) Matsuo, J.-I.; Kozai, T.; Ishibashi, H. *Org. Lett.* **2006**, *8*, 6095.
- 7) Sarkar, S. D.; Studer, A. *Org. Lett.* **2010**, *12*, 1992.
- 8) (a) Chea, H.; Sim, H.-S.; Yun, J. *Adv. Synth. Catal.* **2009**, *351*, 855. (b) Molander, G. A.; Petrillo, D. E. *Org. Lett.* **2008**, *10*, 1795.
- 9) Bagutski, V.; Ros, A.; Aggarwal, V. K. *Tetrahedron* **2009**, *65*, 9956.
- 10) Owing to the rapid hydrolysis that occurs with this family of  $\beta$ -boratoamidohomoenolates, many of the high resolution mass spectrometry values found correspond to hydrolyzed structure in the following form:

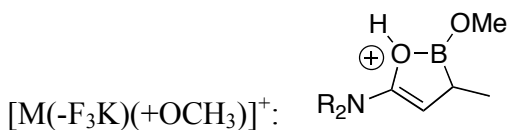

- 11) The absolute configurations of *R* and *S* were assigned on the basis of the absolute determination of *p*-anisidine derivative.

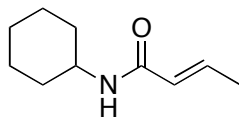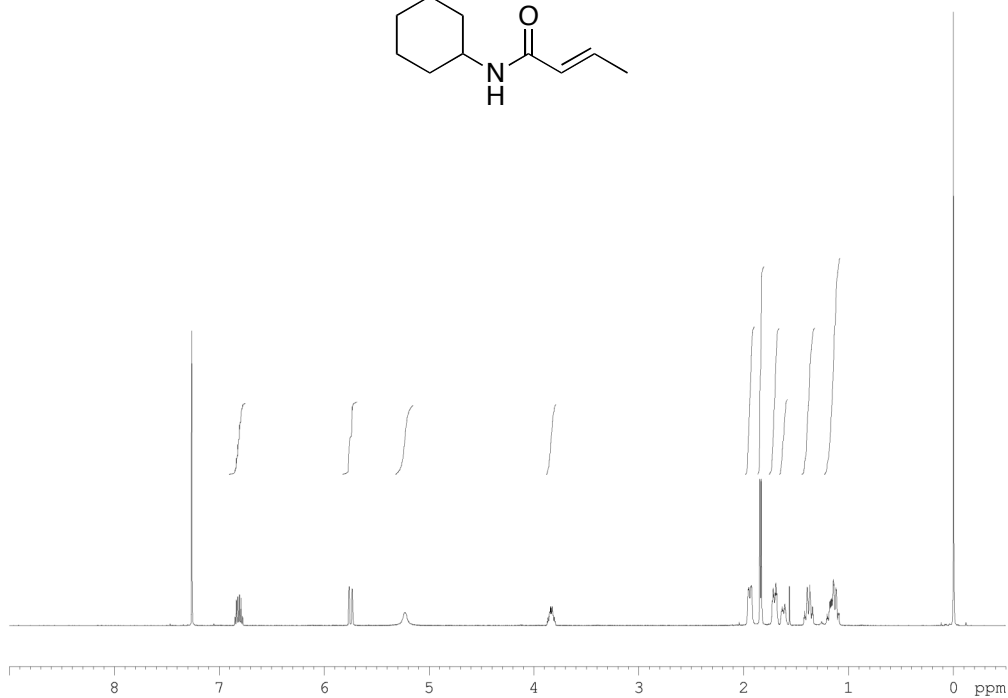

$^1\text{H}$  NMR (500 MHz,  $\text{CDCl}_3$ ) Spectrum of (*E*)-*N*-Cyclohexylbut-2-enamide

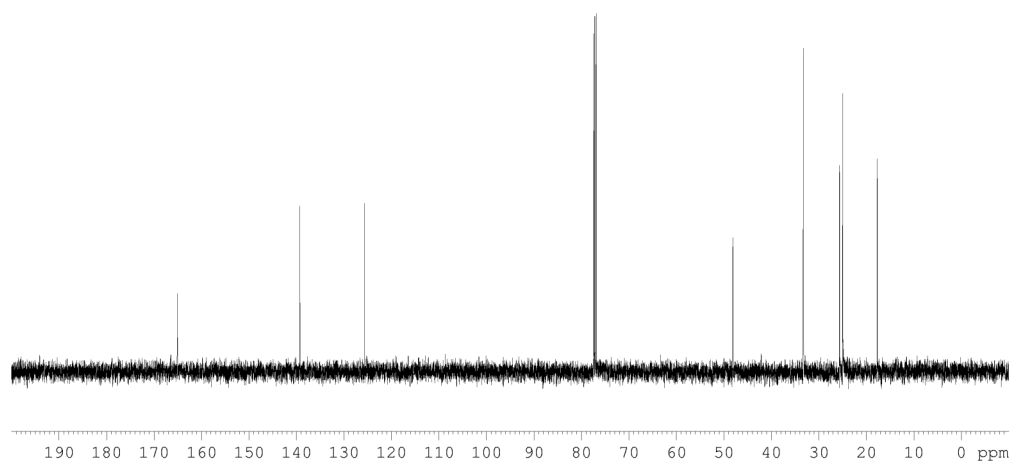

$^{13}\text{C}$  NMR (125.8 MHz,  $\text{CDCl}_3$ ) Spectrum of (*E*)-*N*-Cyclohexylbut-2-enamide

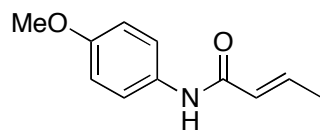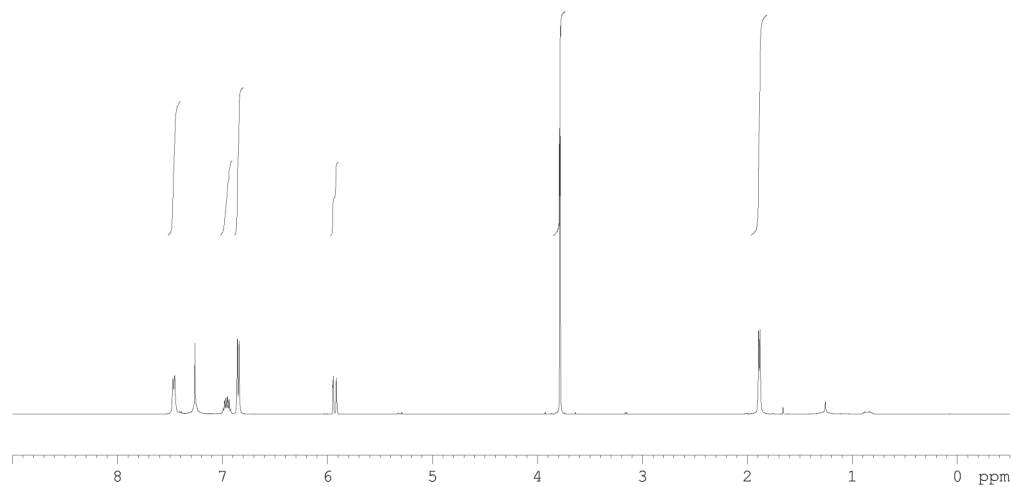

<sup>1</sup>H NMR (500 MHz, CDCl<sub>3</sub>) Spectrum of (*E*)-*N*-(4-Methoxyphenyl)but-2-enamide

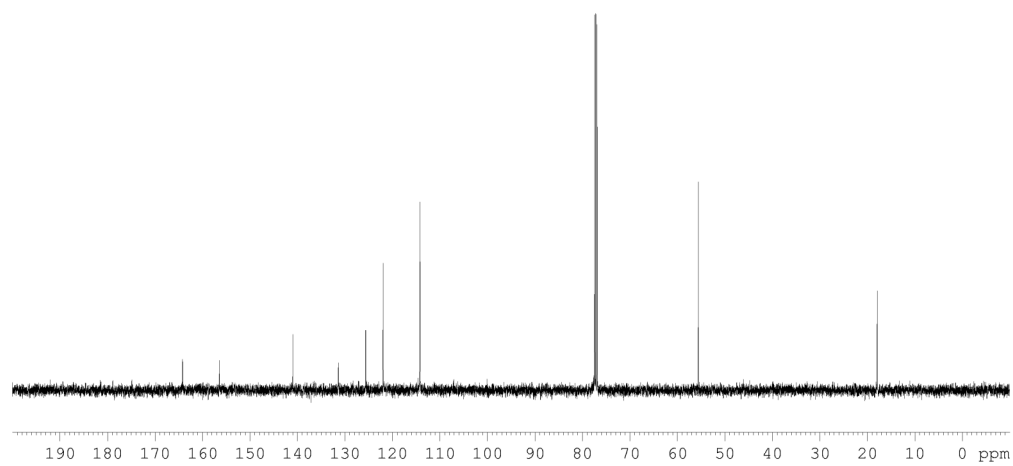

<sup>13</sup>C NMR (125.8 MHz, CDCl<sub>3</sub>) Spectrum of (*E*)-*N*-(4-Methoxyphenyl)but-2-enamide

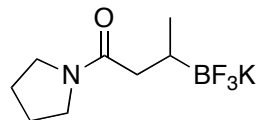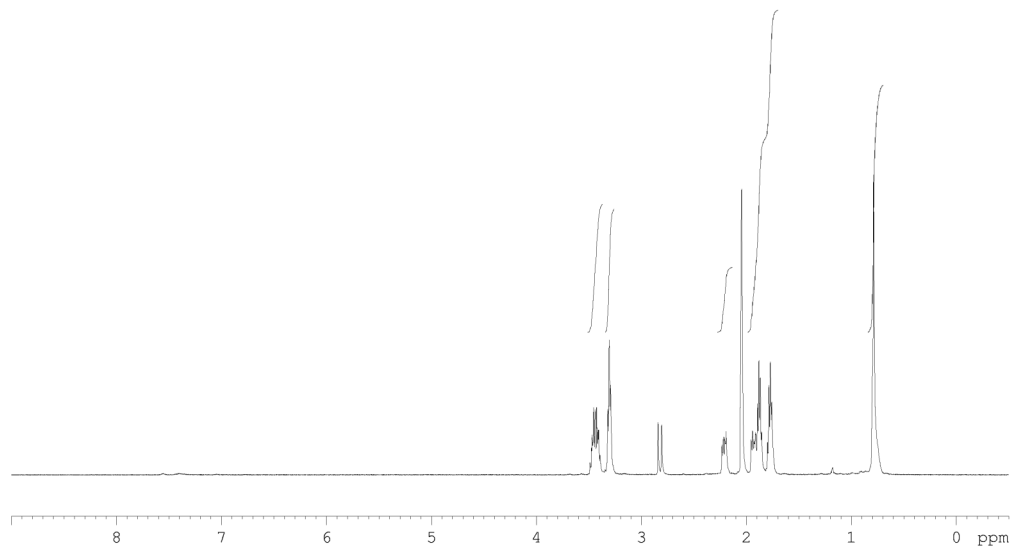

$^1\text{H}$  NMR (500 MHz, acetone- $d_6$ ) Spectrum of Potassium 1-(Pyrrolidin-1-yl)-3-(trifluoroborato)butan-1-one

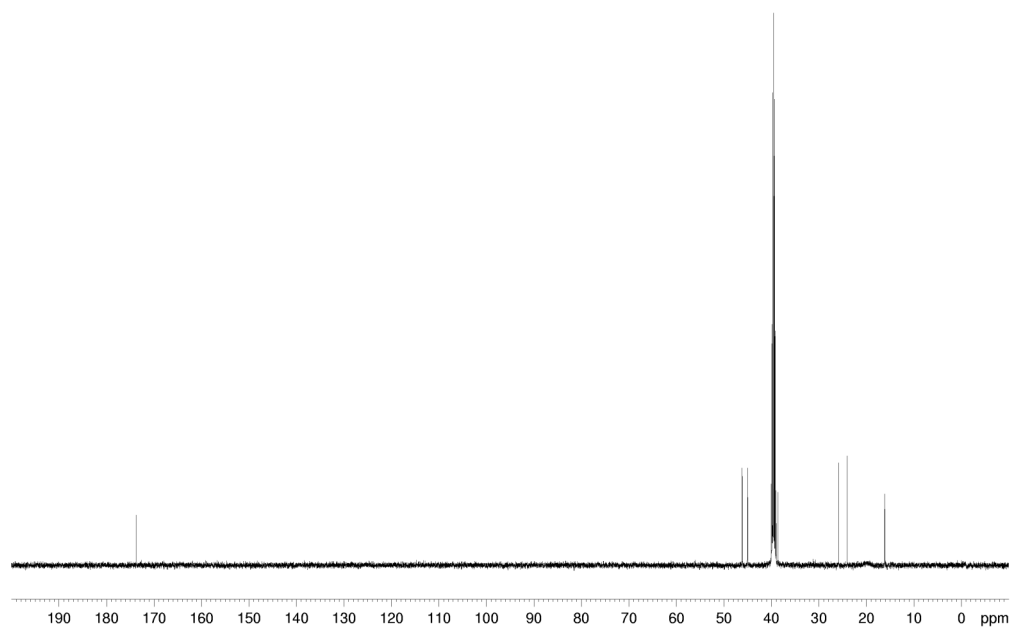

$^{13}\text{C}$  NMR (125.8 MHz, acetone- $d_6$ ) Spectrum of Potassium 1-(Pyrrolidin-1-yl)-3-(trifluoroborato)butan-1-one

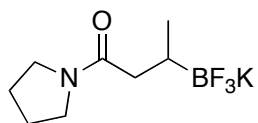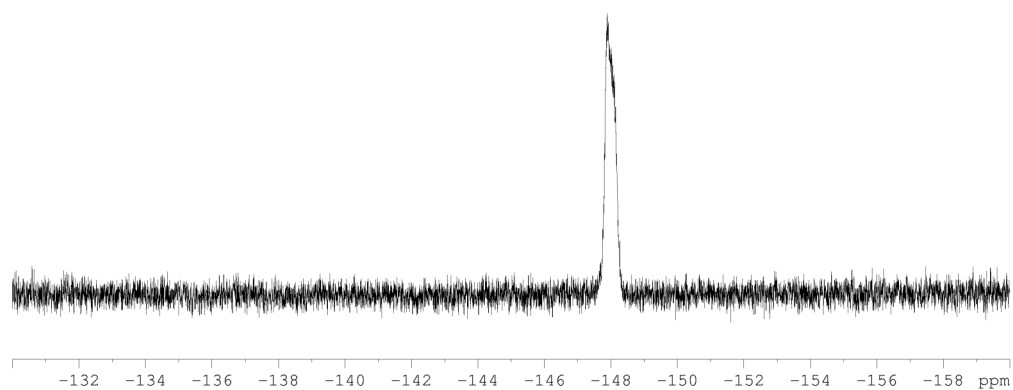

$^{19}\text{F}$  NMR (470.8 MHz, acetone- $d_6$ ) Spectrum of Potassium 1-(Pyrrolidin-1-yl)-3-(trifluoroborato)butan-1-one

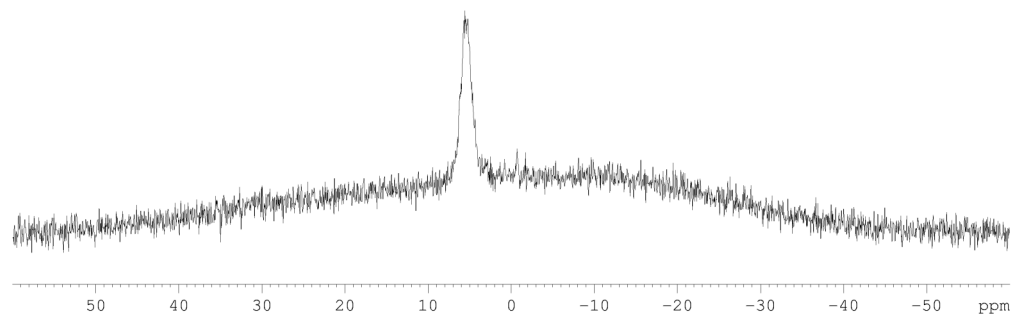

$^{11}\text{B}$  NMR (128.4 MHz, acetone- $d_6$ ) Spectrum of Potassium 1-(Pyrrolidin-1-yl)-3-(trifluoroborato)butan-1-one

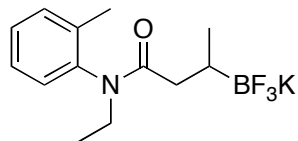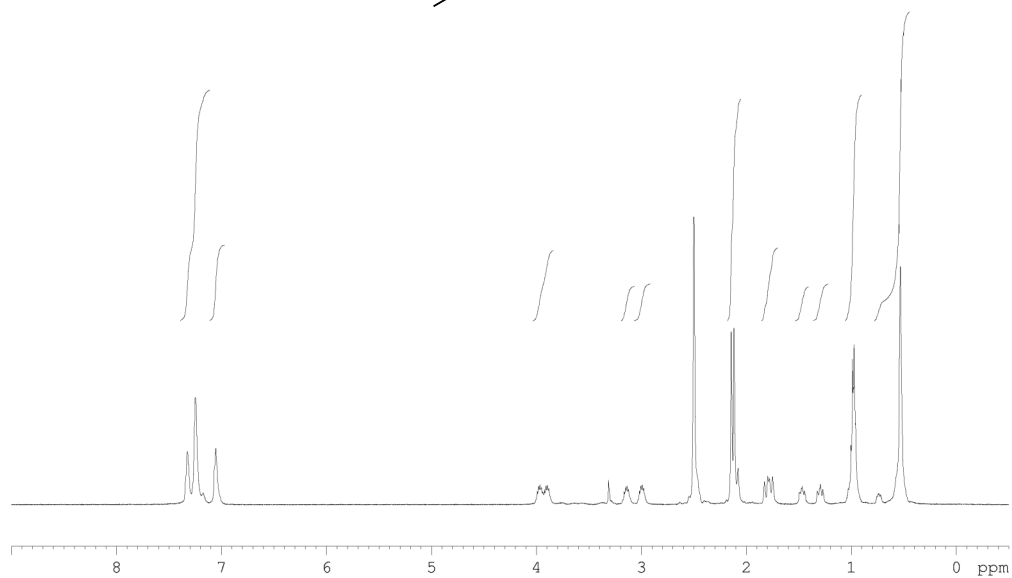

$^1\text{H}$  NMR (500 MHz,  $\text{DMSO-}d_6$ ) Spectrum of Potassium *N*-Ethyl-*N*-(*o*-tolyl)-3-(trifluoroborato)butanamide

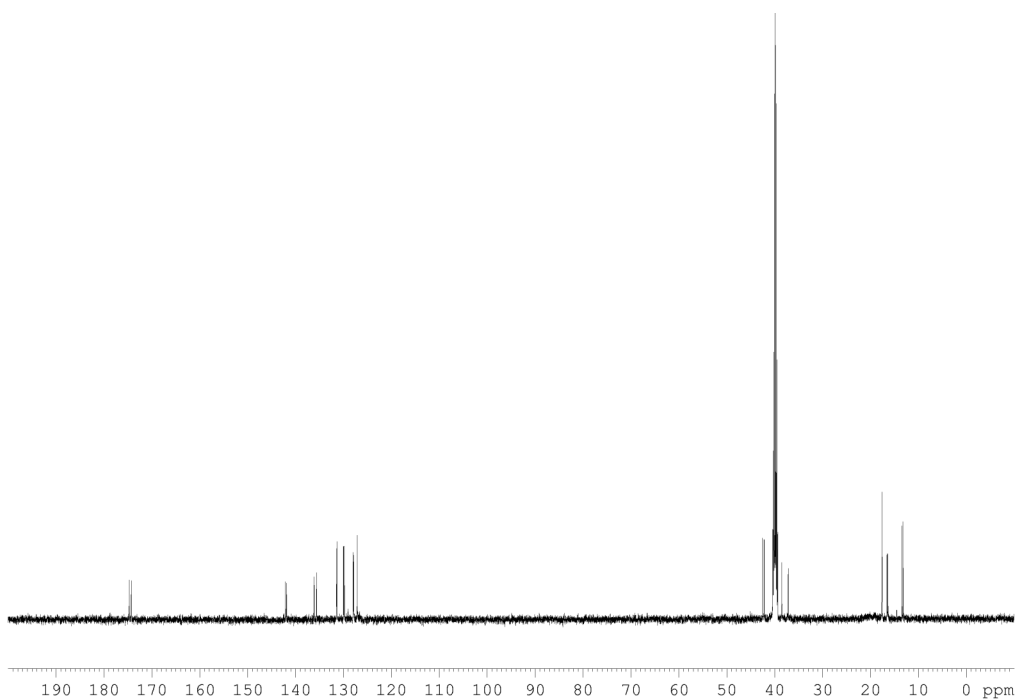

$^{13}\text{C}$  NMR (125.8 MHz,  $\text{DMSO-}d_6$ ) Spectrum of Potassium *N*-Ethyl-*N*-(*o*-tolyl)-3-(trifluoroborato)butanamide

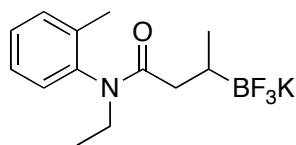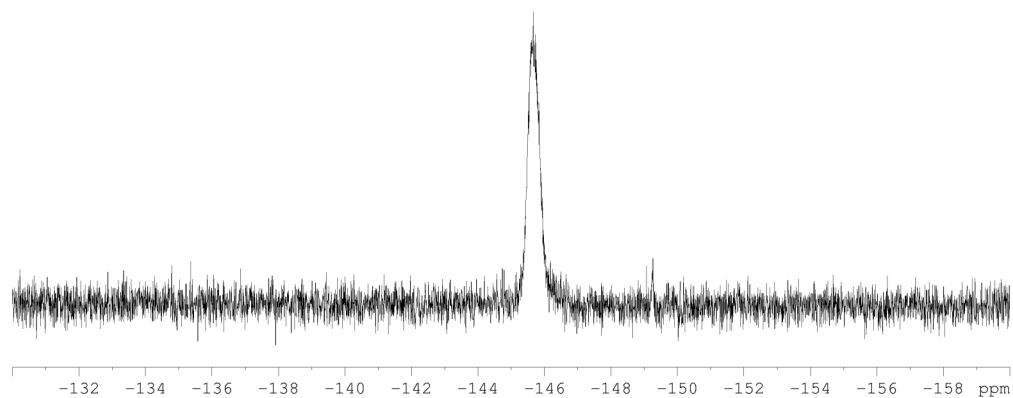

$^{19}\text{F}$  NMR (470.8 MHz,  $\text{DMSO-}d_6$ ) Spectrum of Potassium *N*-Ethyl-*N*-(*o*-tolyl)-3-(trifluoroborato)butanamide

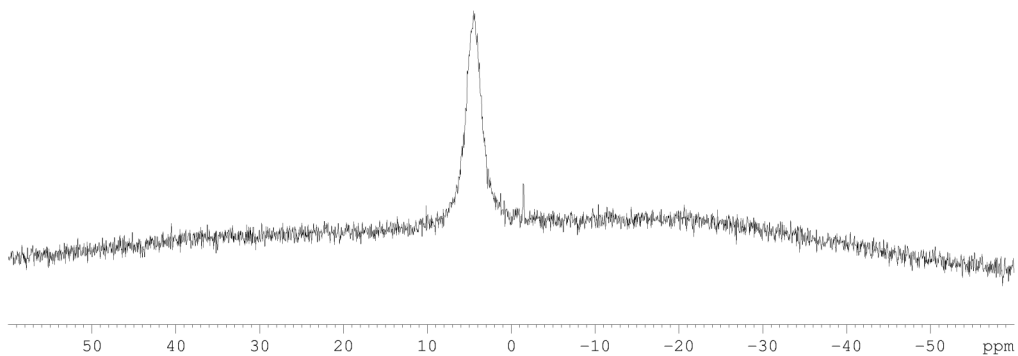

$^{11}\text{B}$  NMR (128.4 MHz,  $\text{DMSO-}d_6$ ) Spectrum of Potassium *N*-Ethyl-*N*-(*o*-tolyl)-3-(trifluoroborato)butanamide



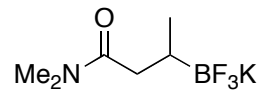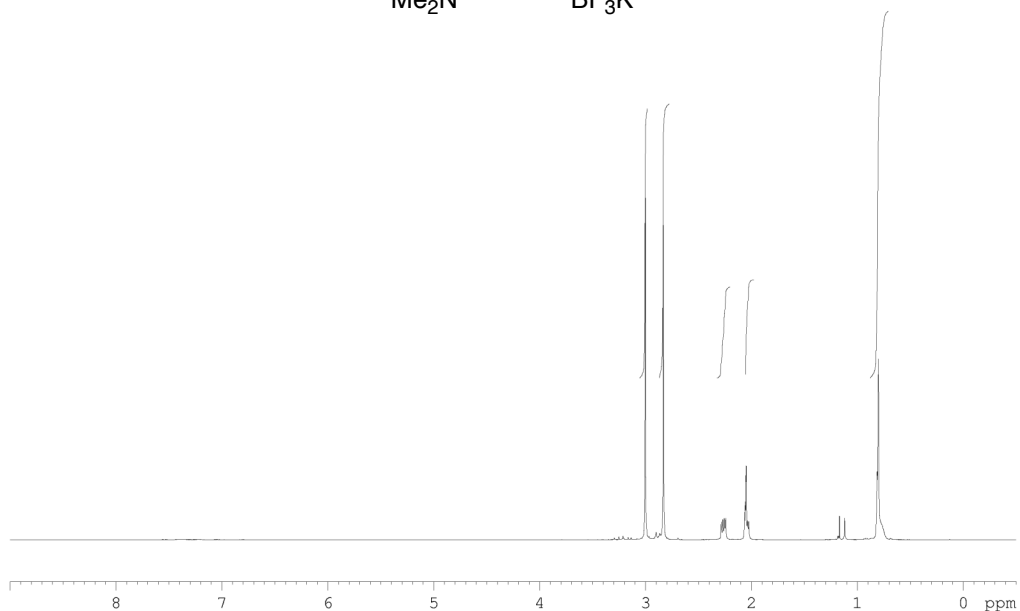

<sup>1</sup>H NMR (500 MHz, acetone-*d*<sub>6</sub>) Spectrum of Potassium *N,N*-Dimethyl-3-(trifluoroborato)butanamide

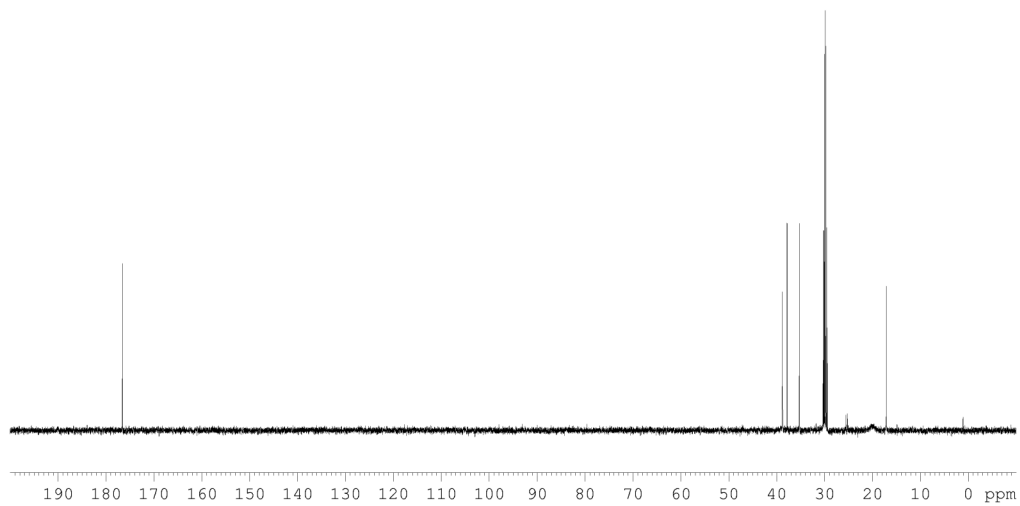

<sup>13</sup>C NMR (125.8 MHz, acetone-*d*<sub>6</sub>) Spectrum of Potassium *N,N*-Dimethyl-3-(trifluoroborato)butanamide

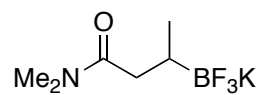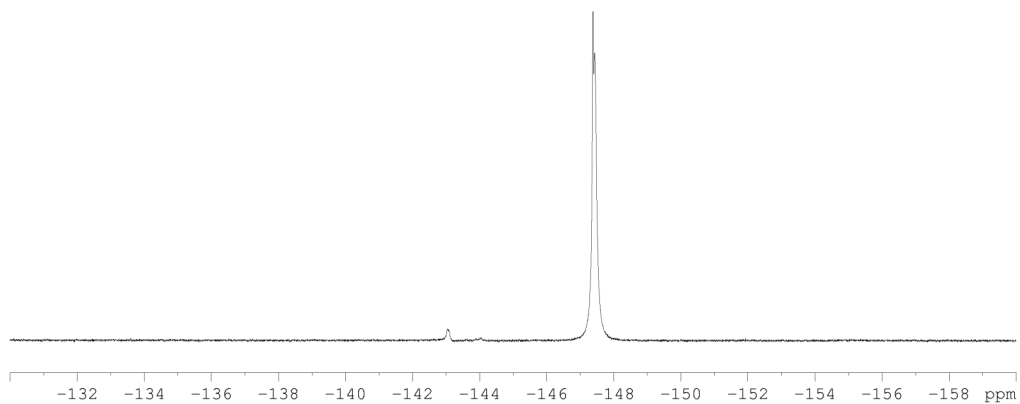

$^{19}\text{F}$  NMR (470.8 MHz, acetone- $d_6$ ) Spectrum of Potassium *N,N*-Dimethyl-3-(trifluoroborato)butanamide

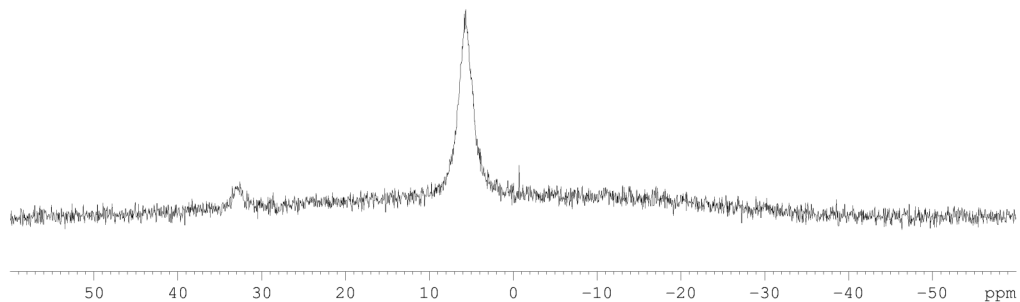

$^{11}\text{B}$  NMR (128.4 MHz, acetone- $d_6$ ) Spectrum of Potassium *N,N*-Dimethyl-3-(trifluoroborato)butanamide

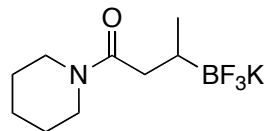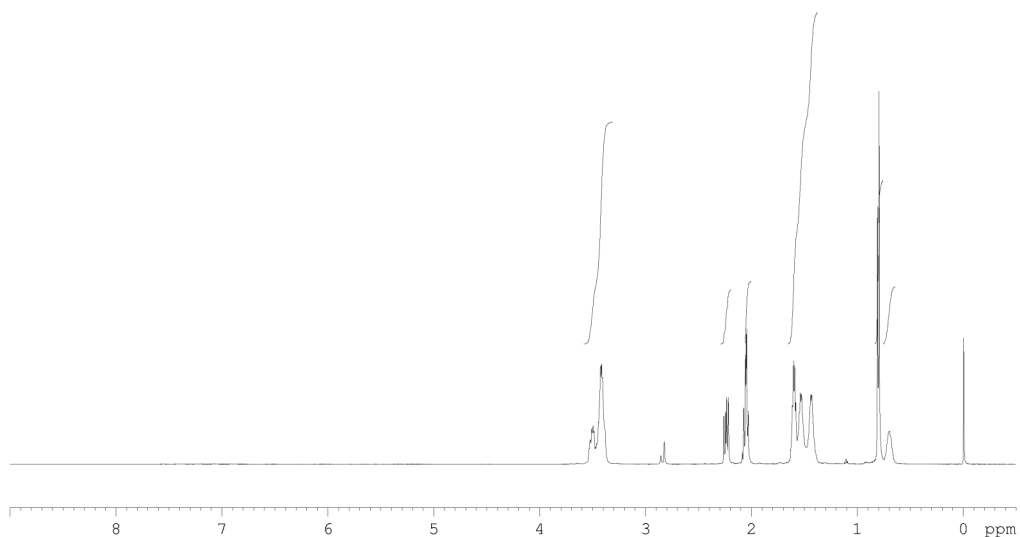

$^1\text{H}$  NMR (500 MHz, acetone- $d_6$ ) Spectrum of Potassium 1-(Piperidin-1-yl)-3-(trifluoroborato)butan-1-one

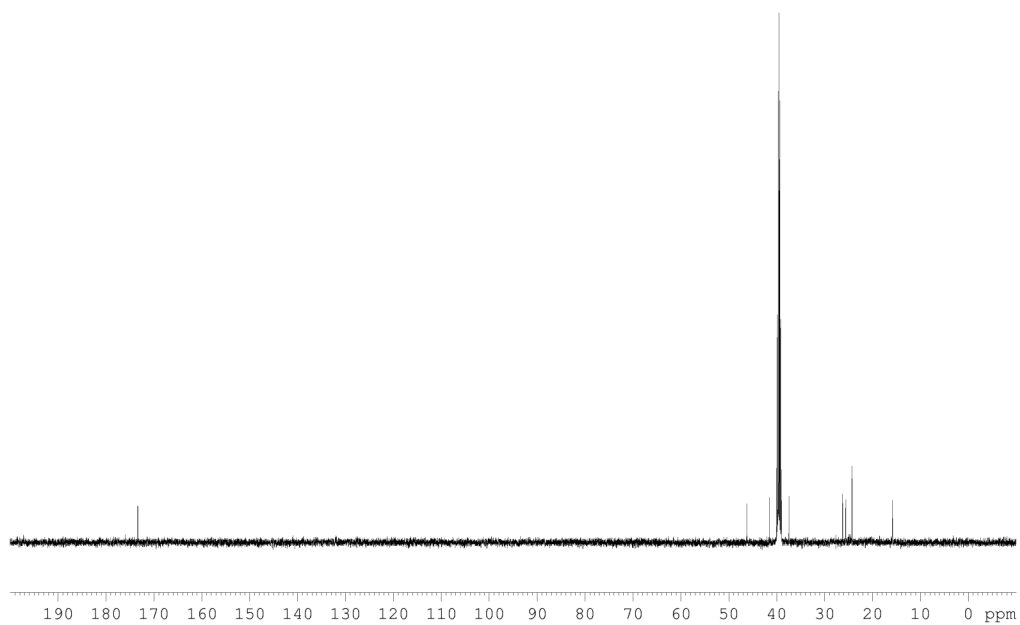

$^{13}\text{C}$  NMR (125.8 MHz, acetone- $d_6$ ) Spectrum of Potassium 1-(Piperidin-1-yl)-3-(trifluoroborato)butan-1-one

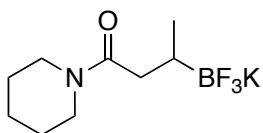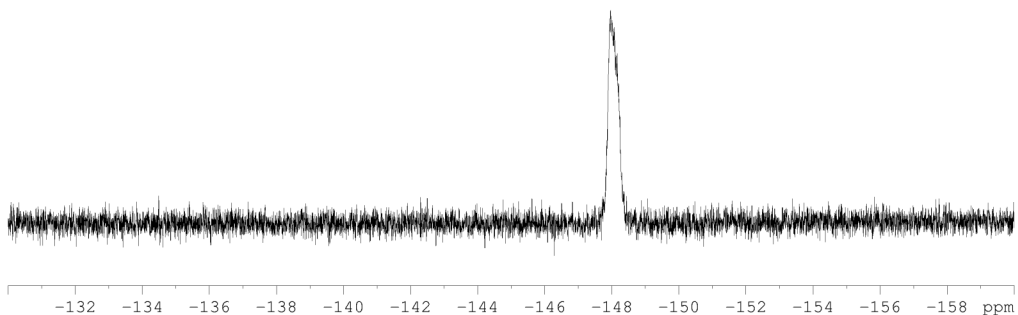

$^{19}\text{F}$  NMR (470.8 MHz, acetone- $d_6$ ) Spectrum of Potassium 1-(Piperidin-1-yl)-3-(trifluoroborato)butan-1-one

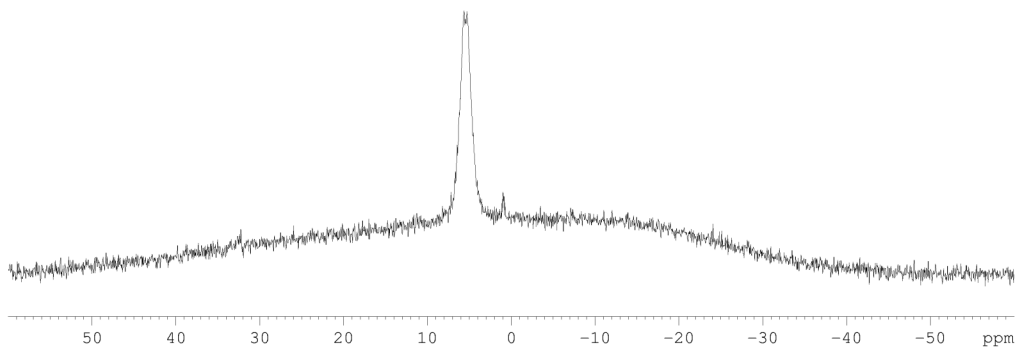

$^{11}\text{B}$  NMR (128.4 MHz, acetone- $d_6$ ) Spectrum of Potassium 1-(Piperidin-1-yl)-3-(trifluoroborato)butan-1-one

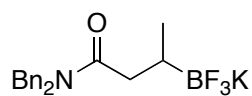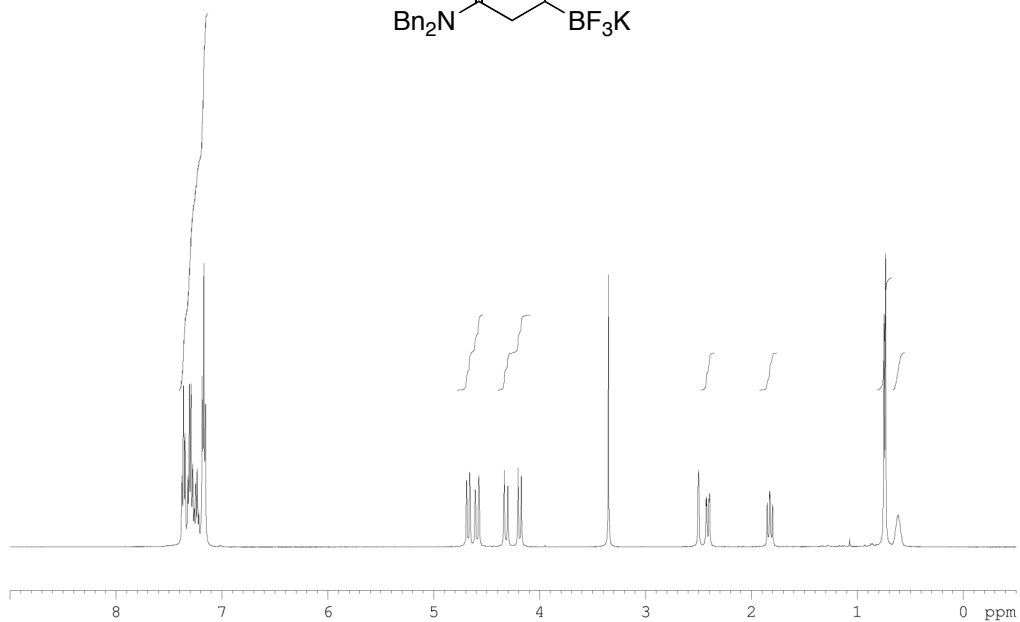

$^1\text{H}$  NMR (500 MHz,  $\text{DMSO-}d_6$ ) Spectrum of Potassium *N,N*-Dibenzyl-3-(trifluoroborato)butanamide

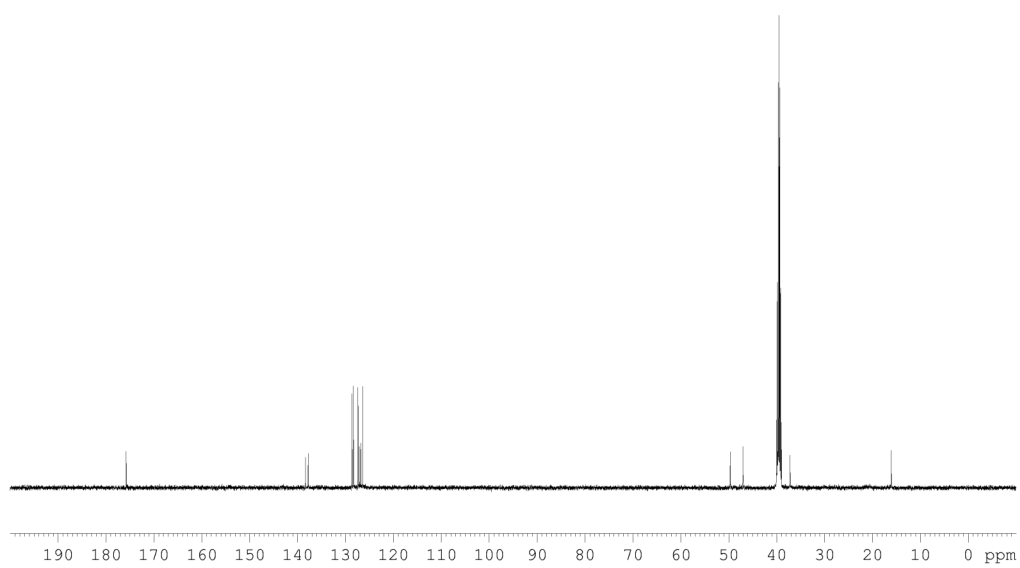

$^{13}\text{C}$  NMR (125.8 MHz,  $\text{DMSO-}d_6$ ) Spectrum of Potassium *N,N*-Dibenzyl-3-(trifluoroborato)butanamide

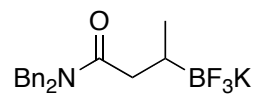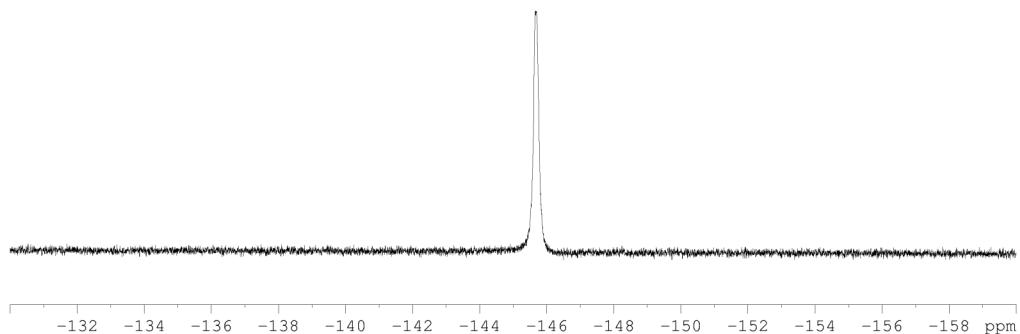

$^{19}\text{F}$  NMR (470.8 MHz,  $\text{DMSO-}d_6$ ) Spectrum of Potassium *N,N*-Dibenzyl-3-(trifluoroborato)butanamide

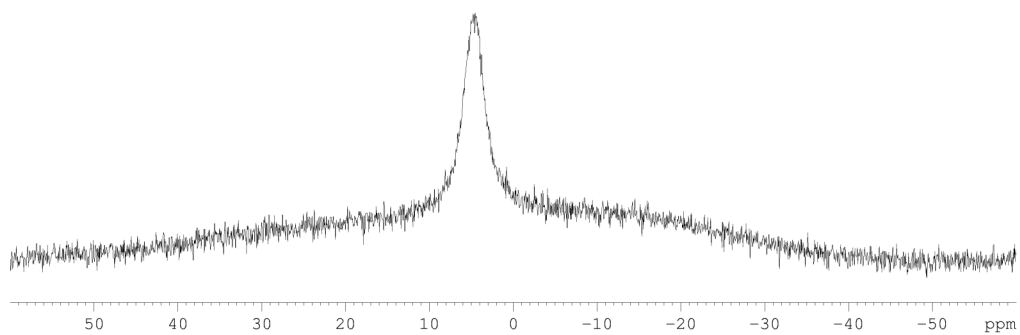

$^{11}\text{B}$  NMR (128.4 MHz,  $\text{DMSO-}d_6$ ) Spectrum of Potassium *N,N*-Dibenzyl-3-(trifluoroborato)butanamide

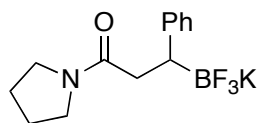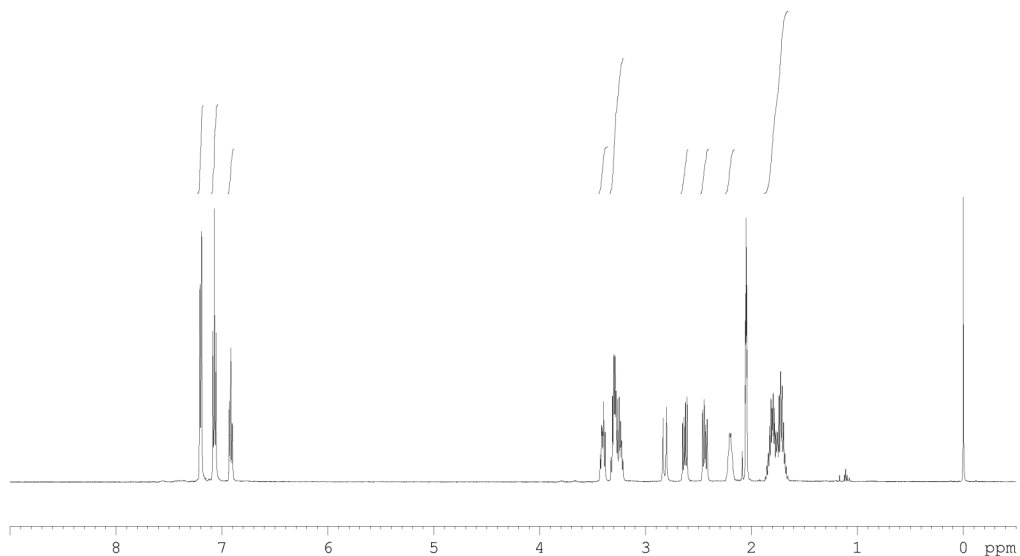

$^1\text{H}$  NMR (500 MHz, acetone- $d_6$ ) Spectrum of Potassium 3-Phenyl-1-(pyrrolidin-1-yl)-3-(trifluoroborato)propan-1-one

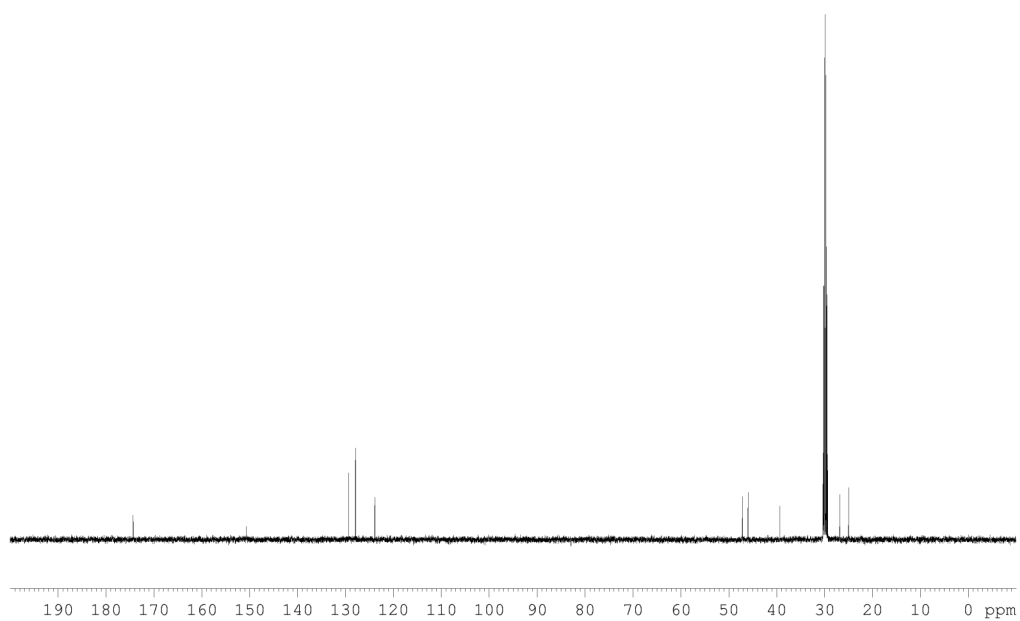

$^{13}\text{C}$  NMR (125.8 MHz, acetone- $d_6$ ) Spectrum of Potassium 3-Phenyl-1-(pyrrolidin-1-yl)-3-(trifluoroborato)propan-1-one

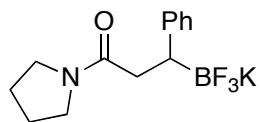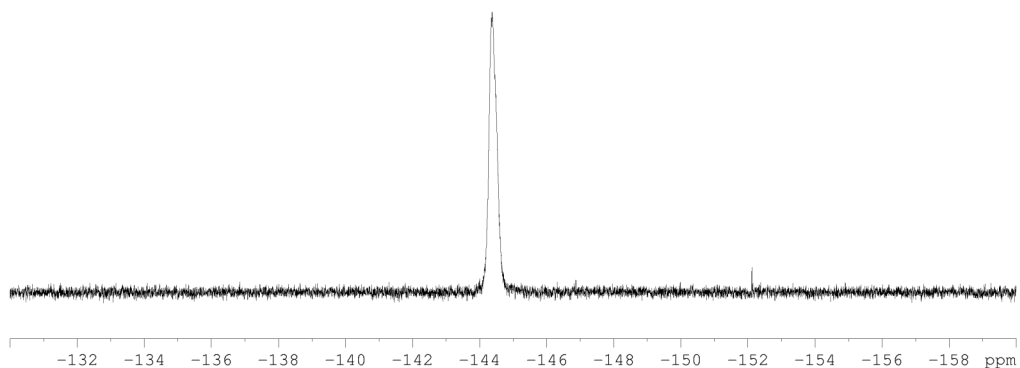

$^{19}\text{F}$  NMR (470.8 MHz, acetone- $d_6$ ) Spectrum of Potassium 3-Phenyl-1-(pyrrolidin-1-yl)-3-(trifluoroborato)propan-1-one

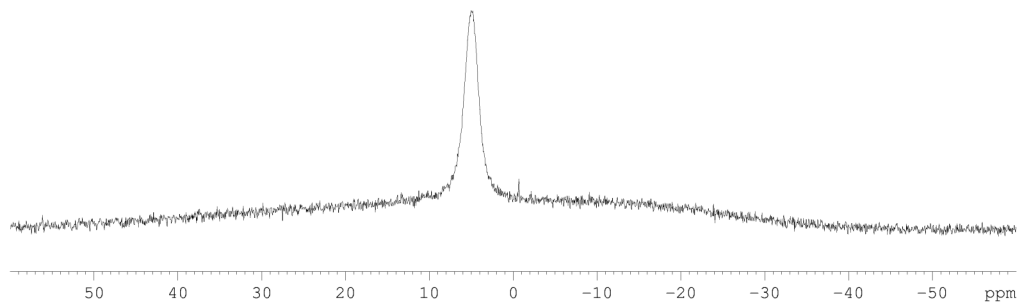

$^{11}\text{B}$  NMR (128.4 MHz, acetone- $d_6$ ) Spectrum of Potassium 3-Phenyl-1-(pyrrolidin-1-yl)-3-(trifluoroborato)propan-1-one



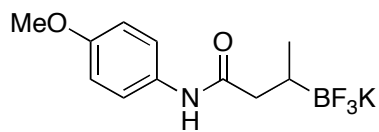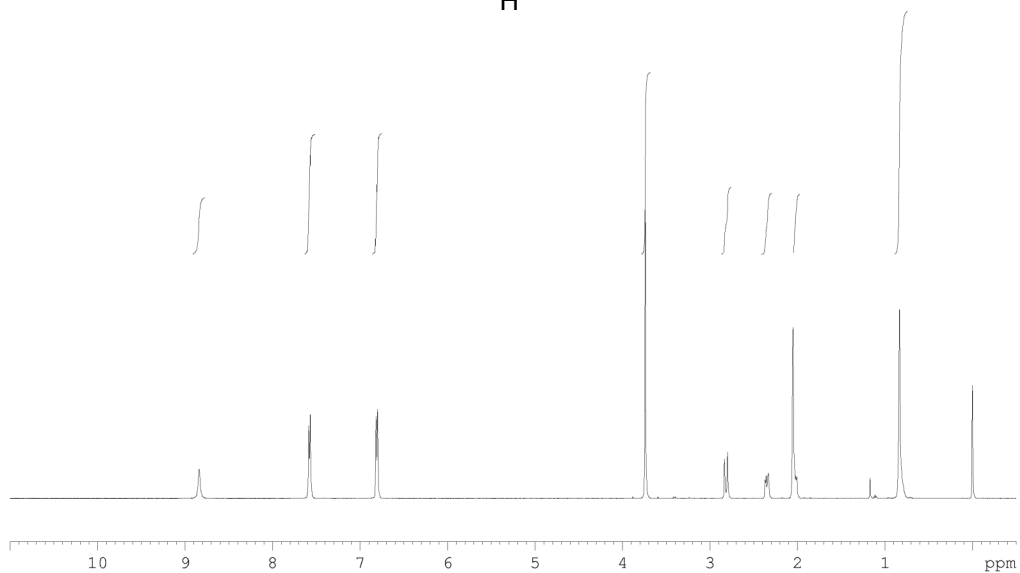

<sup>1</sup>H NMR (500 MHz, acetone-*d*<sub>6</sub>) Spectrum of Potassium *N*-(4-Methoxyphenyl)-3-(trifluoroborato)butanamide

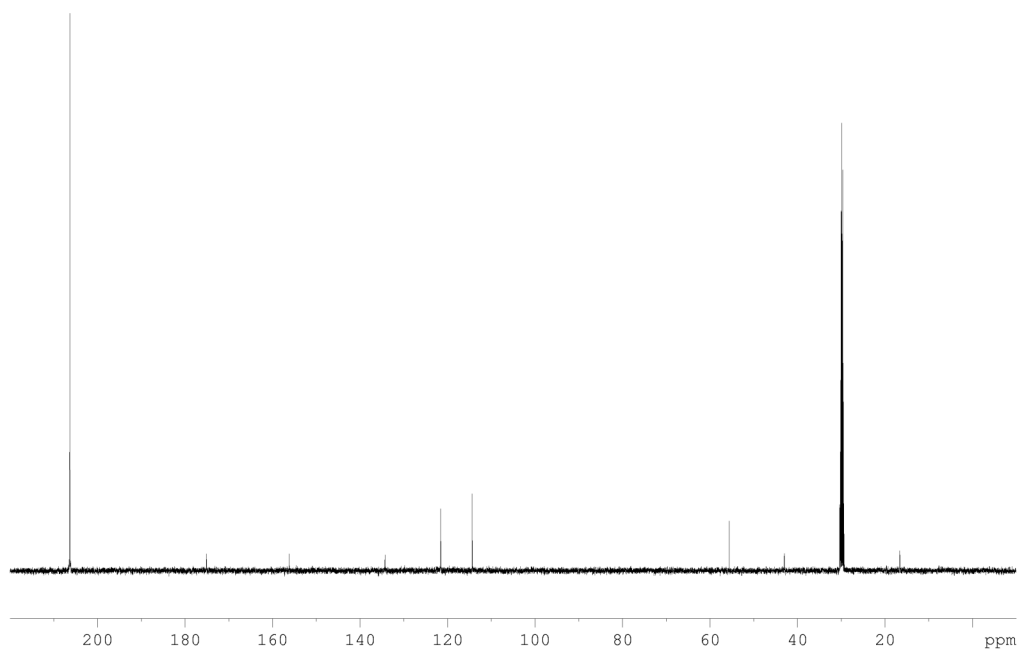

<sup>13</sup>C NMR (125.8 MHz, acetone-*d*<sub>6</sub>) Spectrum of Potassium *N*-(4-Methoxyphenyl)-3-(trifluoroborato)butanamide

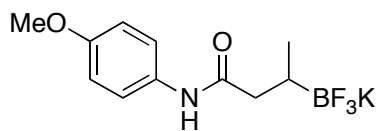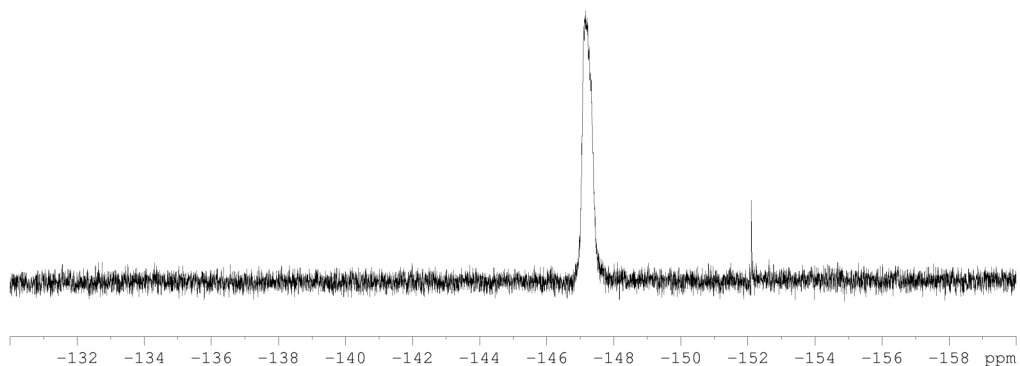

<sup>19</sup>F NMR (470.8 MHz, acetone-*d*<sub>6</sub>) Spectrum of Potassium *N*-(4-Methoxyphenyl)-3-(trifluoroborato)butanamide

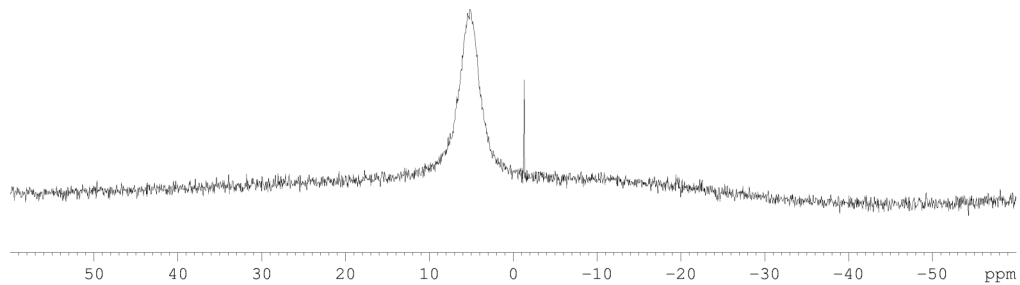

<sup>11</sup>B NMR (128.4 MHz, acetone-*d*<sub>6</sub>) Spectrum of Potassium *N*-(4-Methoxyphenyl)-3-(trifluoroborato)butanamide

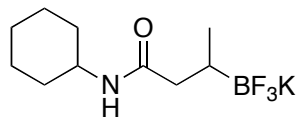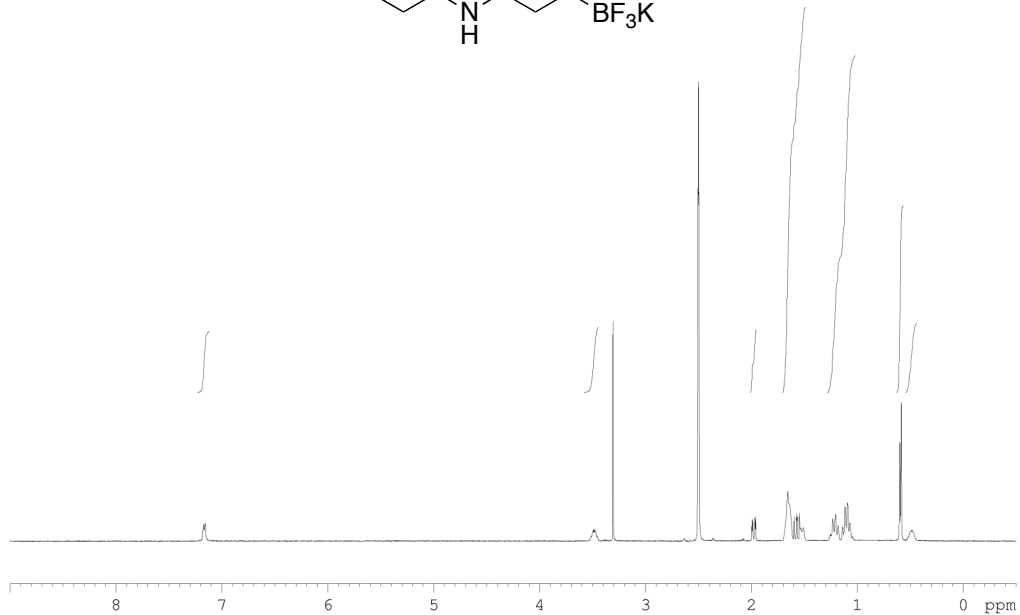

<sup>1</sup>H NMR (500 MHz, DMSO-*d*<sub>6</sub>) Spectrum of Potassium *N*-Cyclohexyl-3-(trifluoroborato)butanamide

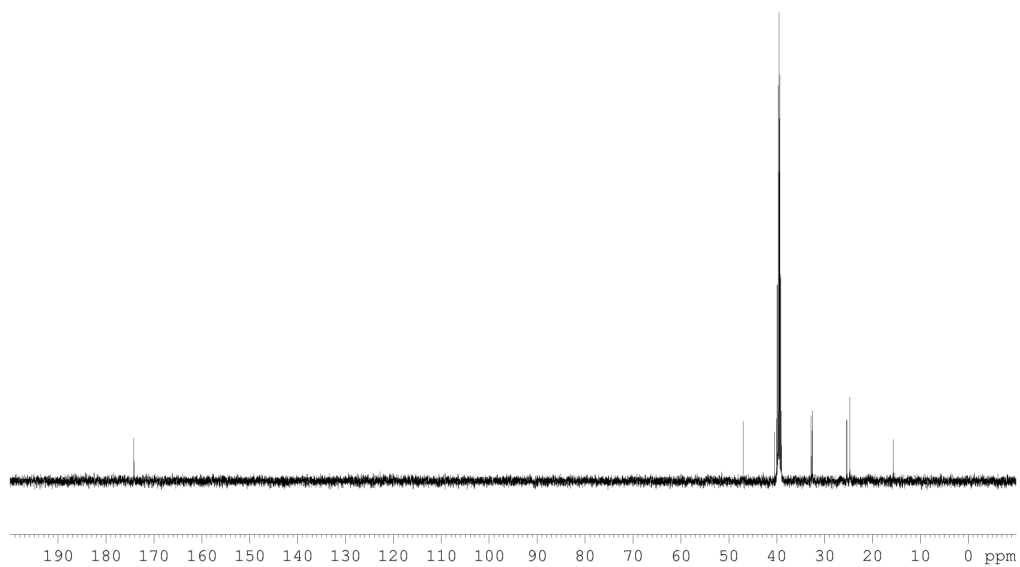

<sup>13</sup>C NMR (125.8 MHz, DMSO-*d*<sub>6</sub>) Spectrum of Potassium *N*-Cyclohexyl-3-(trifluoroborato)butanamide

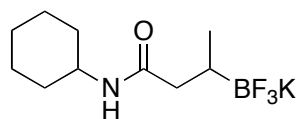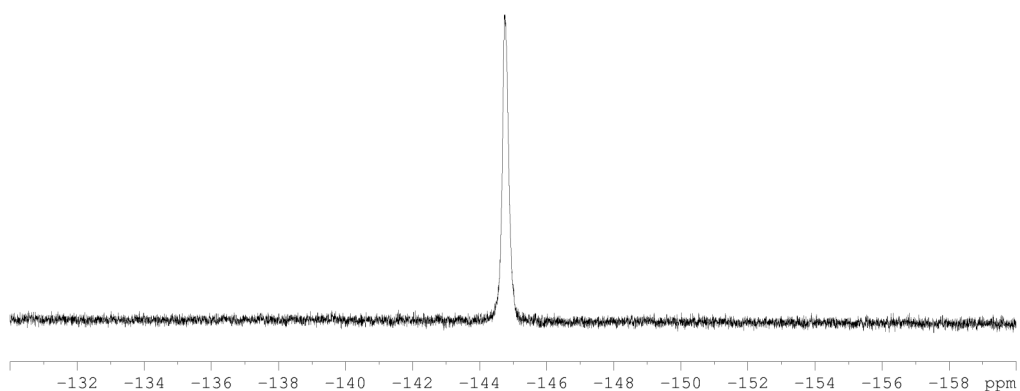

$^{19}\text{F}$  NMR (470.8 MHz,  $\text{DMSO-}d_6$ ) Spectrum of Potassium *N*-Cyclohexyl-3-(trifluoroborato)butanamide

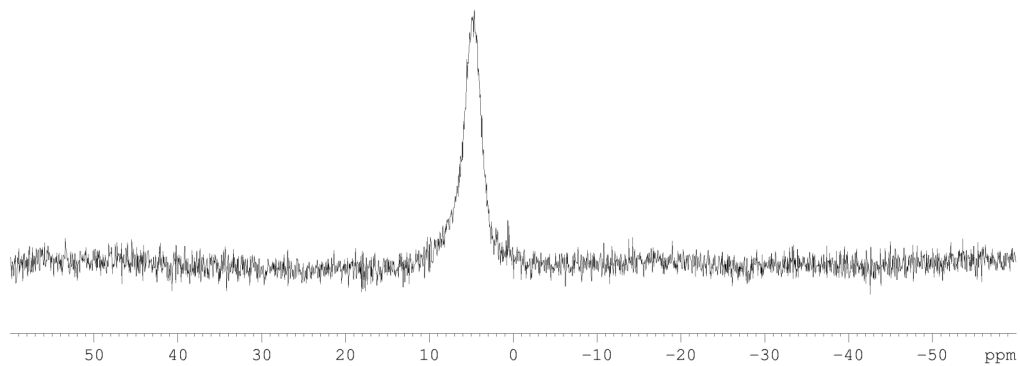

$^{11}\text{B}$  NMR (128.4 MHz,  $\text{DMSO-}d_6$ ) Spectrum of Potassium *N*-Cyclohexyl-3-(trifluoroborato)butanamide

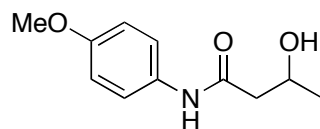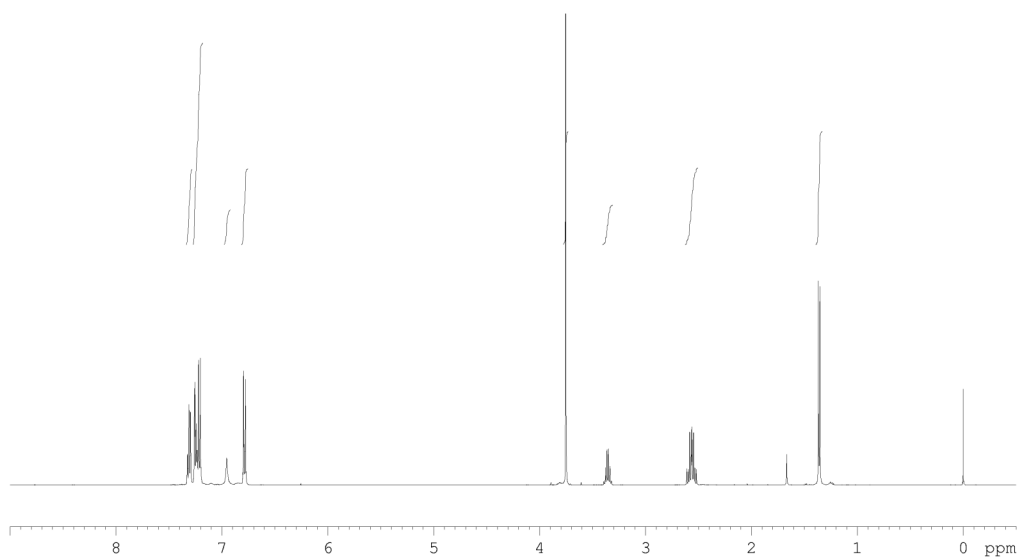

<sup>1</sup>H NMR (500 MHz, CDCl<sub>3</sub>) Spectrum of 3-Hydroxy-*N*-(4-methoxyphenyl)butanamide

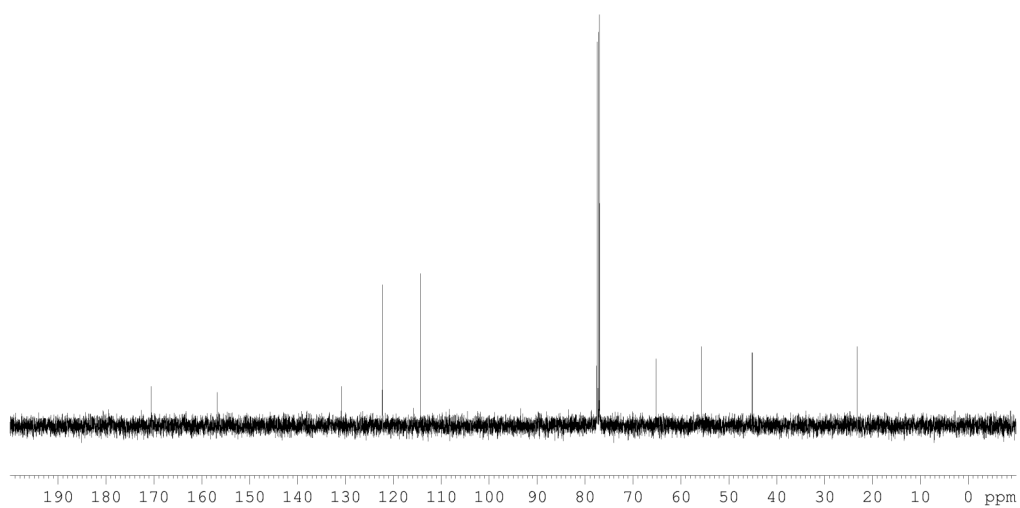

<sup>13</sup>C NMR (125.8 MHz, CDCl<sub>3</sub>) Spectrum of 3-Hydroxy-*N*-(4-methoxyphenyl)butanamide

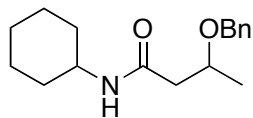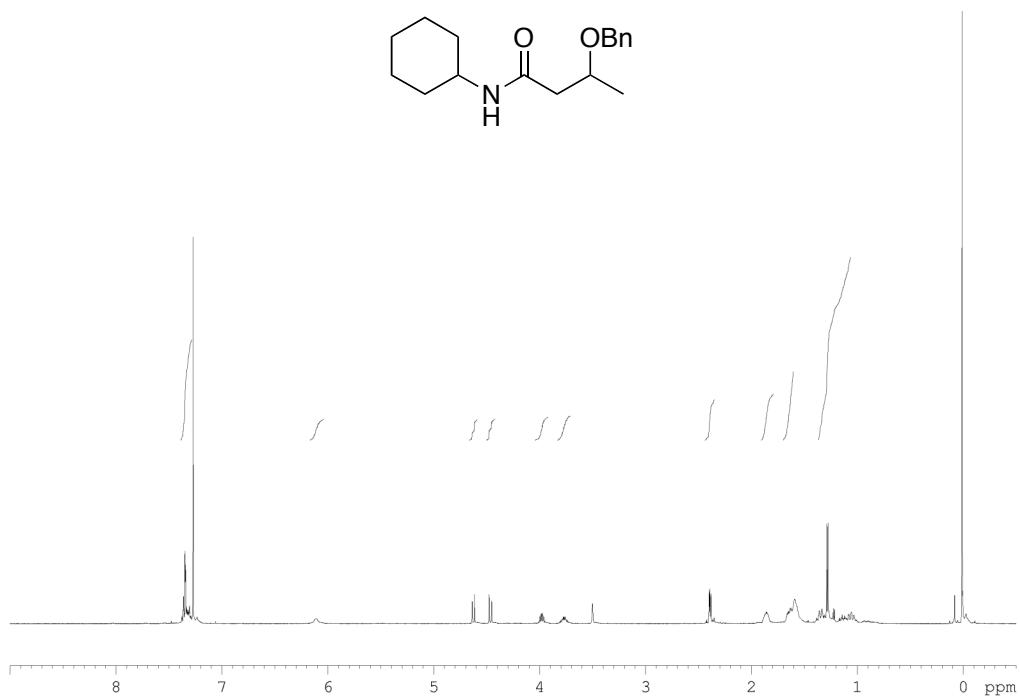

<sup>1</sup>H NMR (500 MHz, CDCl<sub>3</sub>) Spectrum of 3-(Benzyloxy)-*N*-cyclohexylbutanamide

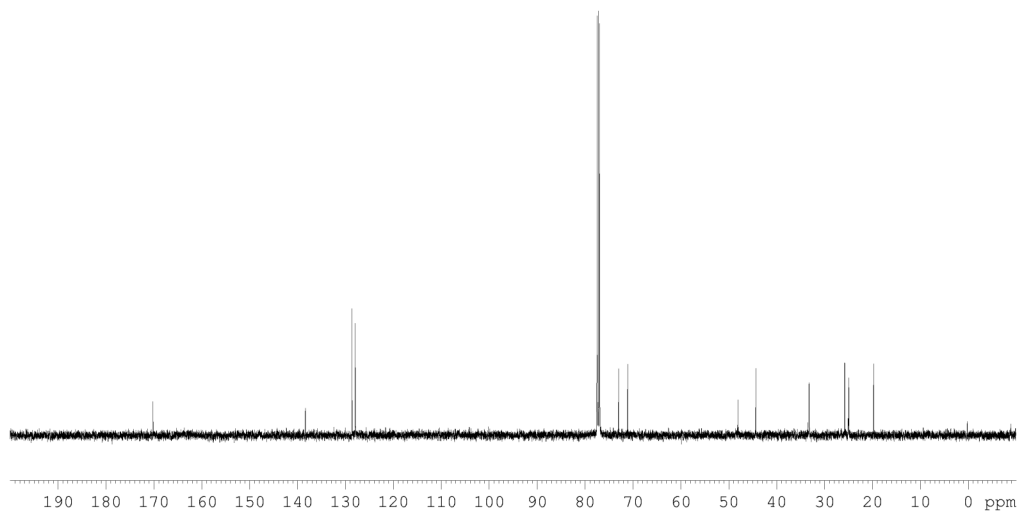

<sup>13</sup>C NMR (125.8 MHz, CDCl<sub>3</sub>) Spectrum of 3-(Benzyloxy)-*N*-cyclohexylbutanamide

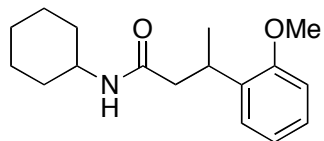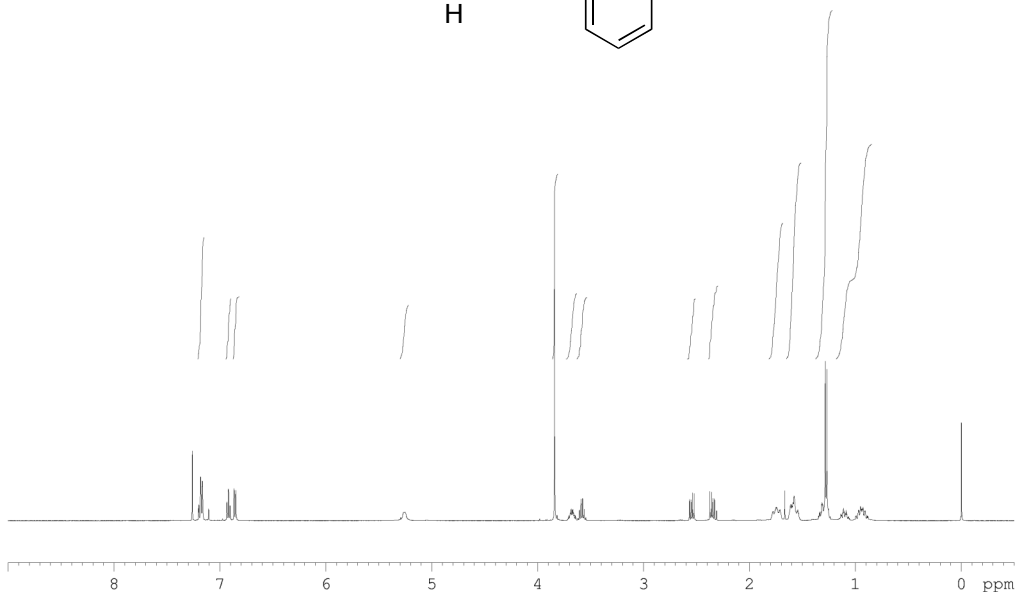

<sup>1</sup>H NMR (500 MHz, CDCl<sub>3</sub>) Spectrum of *N*-Cyclohexyl-3-(2-methoxyphenyl)butanamide

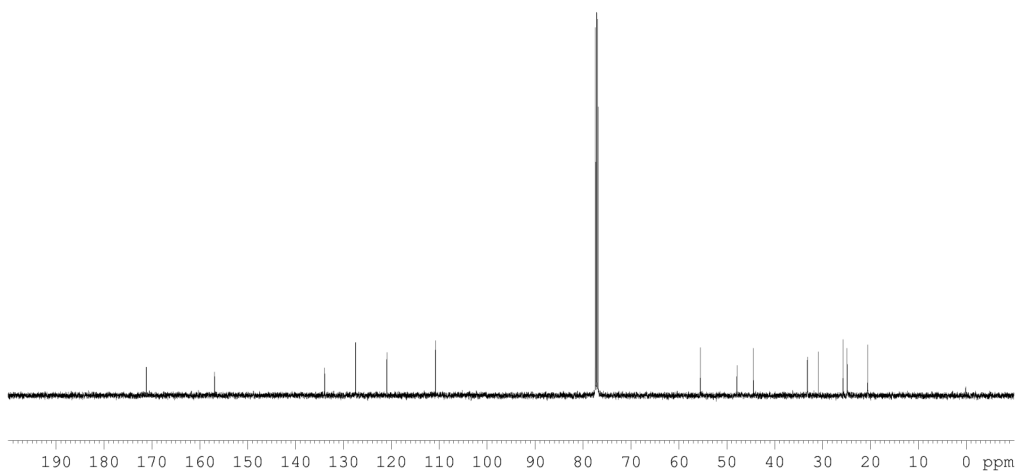

<sup>13</sup>C NMR (125.8 MHz, CDCl<sub>3</sub>) Spectrum of *N*-Cyclohexyl-3-(2-methoxyphenyl)butanamide

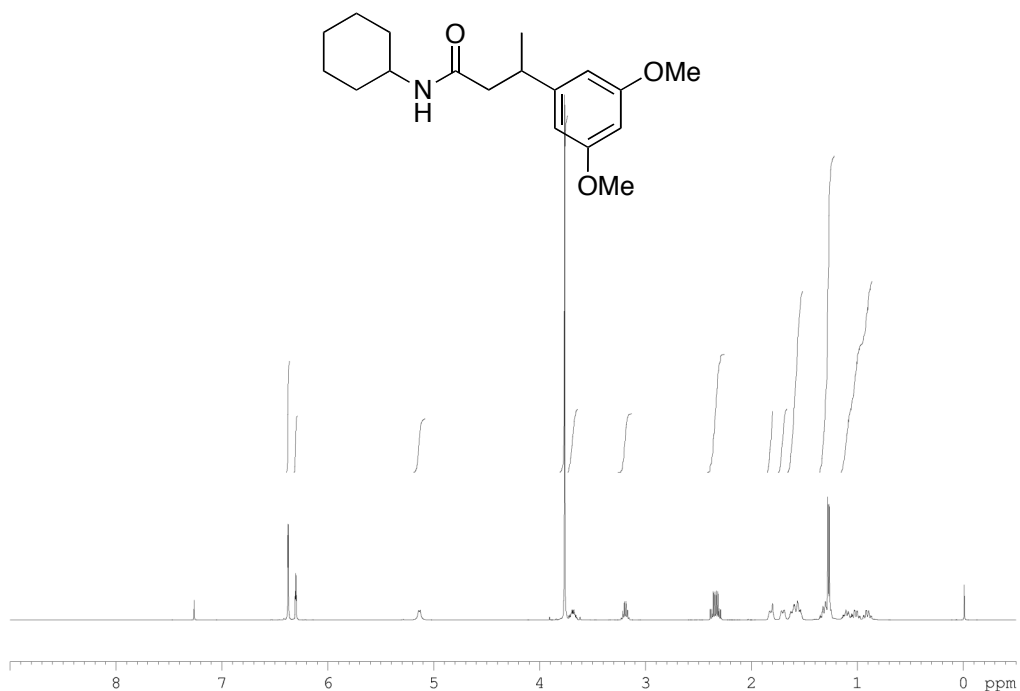

<sup>1</sup>H NMR (500 MHz, CDCl<sub>3</sub>) Spectrum of *N*-Cyclohexyl-3-(3,5-dimethoxyphenyl)butanamide

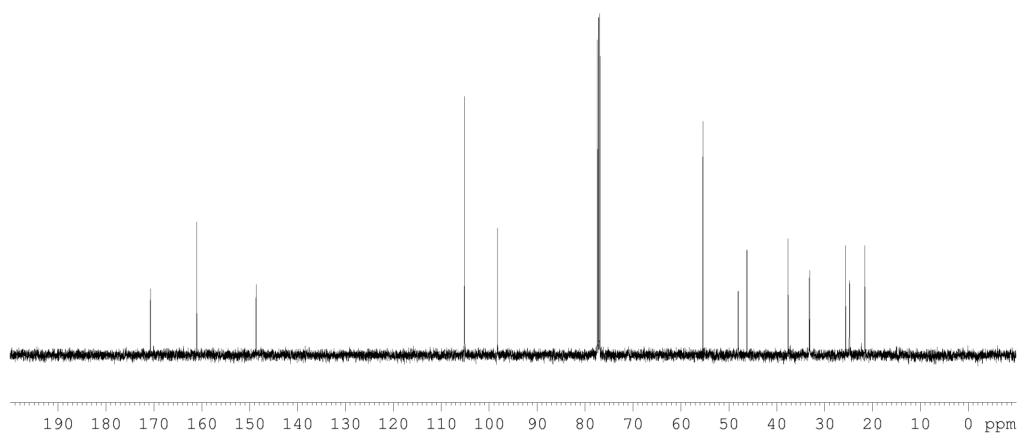

<sup>13</sup>C NMR (125.8 MHz, CDCl<sub>3</sub>) Spectrum of *N*-Cyclohexyl-3-(3,5-dimethoxyphenyl)butanamide



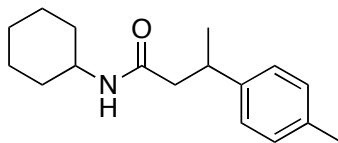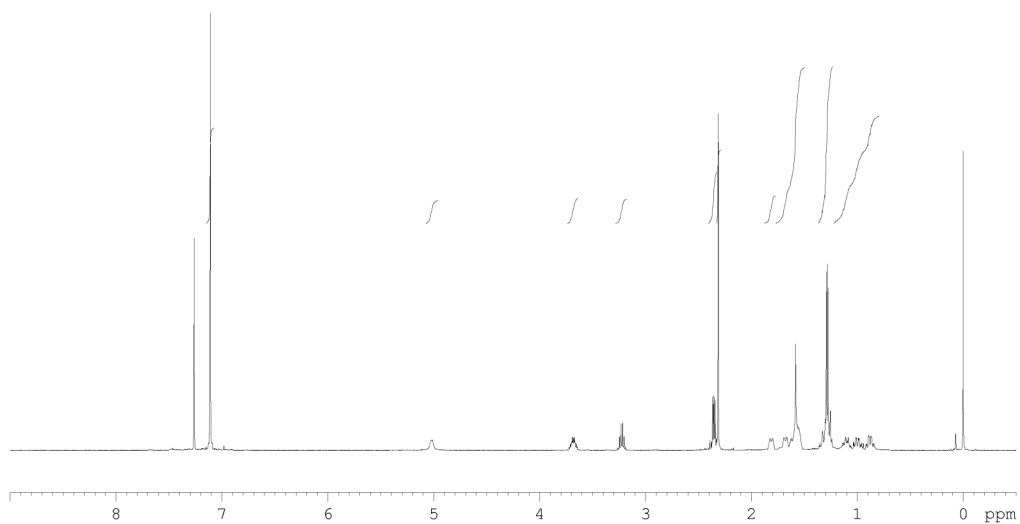

<sup>1</sup>H NMR (500 MHz, CDCl<sub>3</sub>) Spectrum of *N*-Cyclohexyl-3-(*p*-tolyl)butanamide

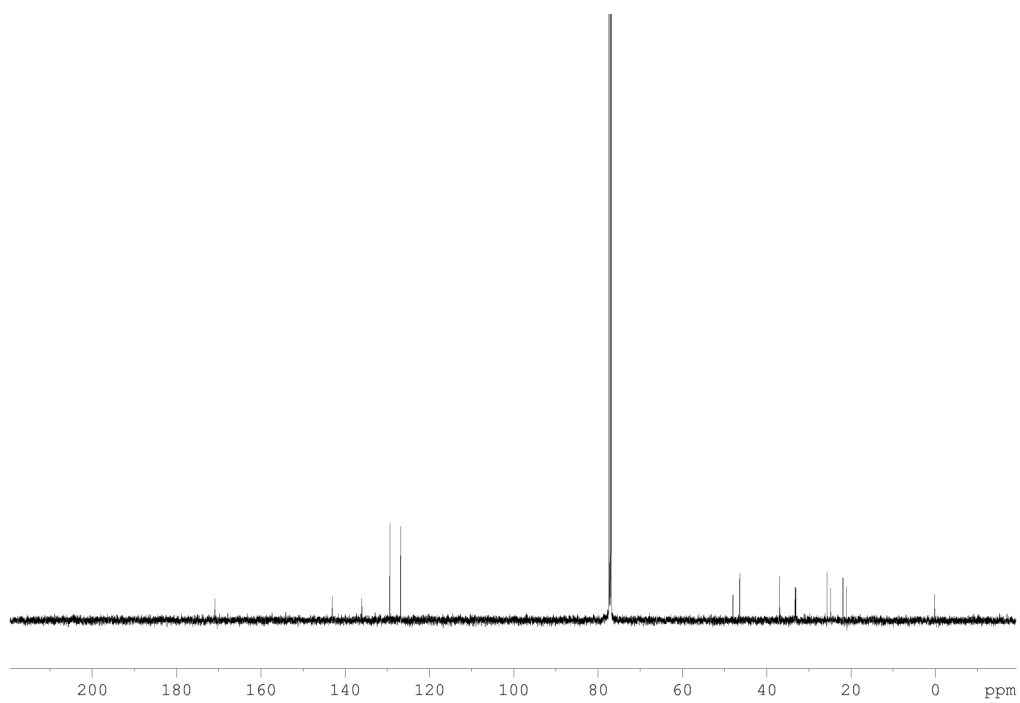

<sup>13</sup>C NMR (125.8 MHz, CDCl<sub>3</sub>) Spectrum of *N*-Cyclohexyl-3-(*p*-tolyl)butanamide

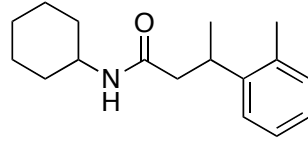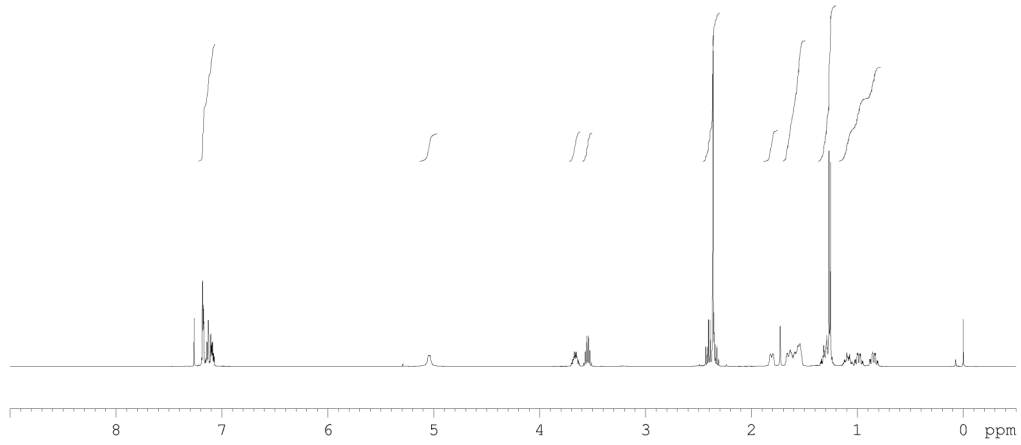

<sup>1</sup>H NMR (500 MHz, CDCl<sub>3</sub>) Spectrum of *N*-Cyclohexyl-3-(*o*-tolyl)butanamide

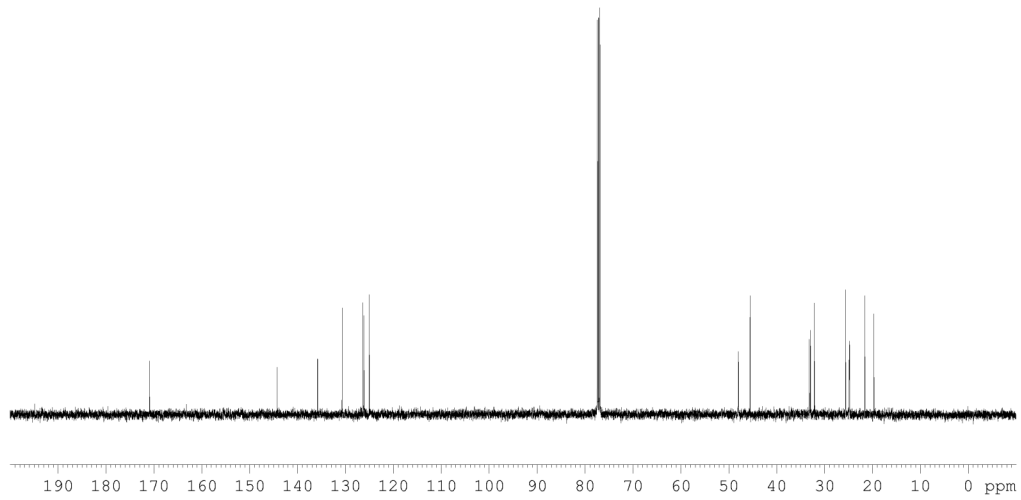

<sup>13</sup>C NMR (125.8 MHz, CDCl<sub>3</sub>) Spectrum of *N*-Cyclohexyl-3-(*o*-tolyl)butanamide

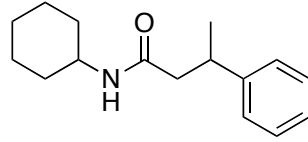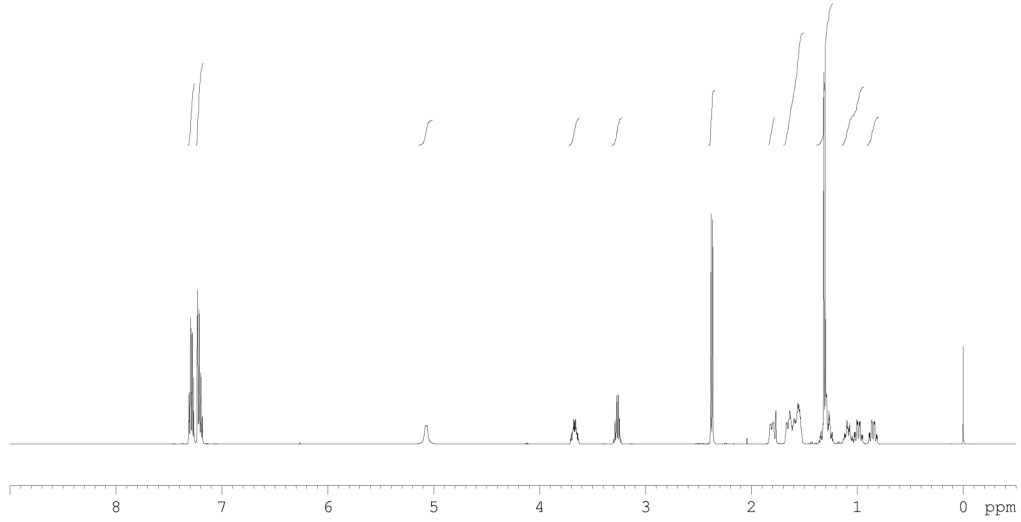

<sup>1</sup>H NMR (500 MHz, CDCl<sub>3</sub>) Spectrum of *N*-Cyclohexyl-3-phenylbutanamide

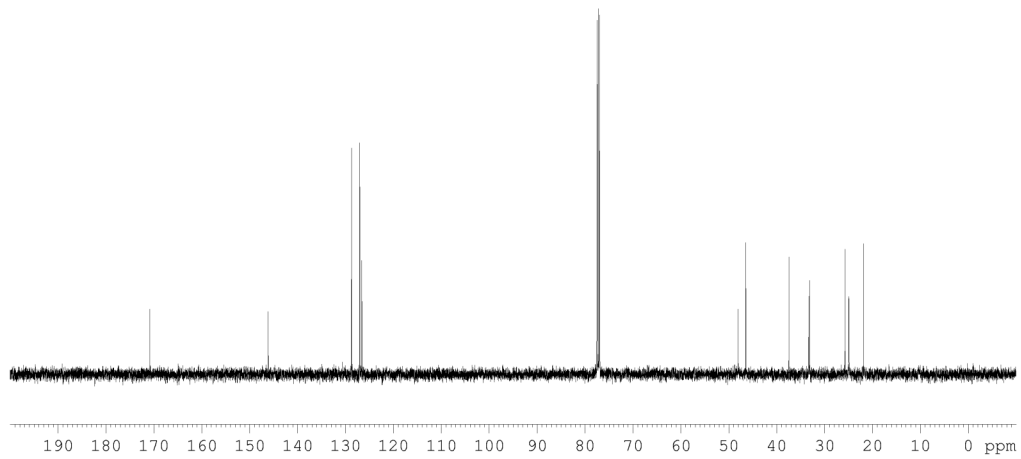

<sup>13</sup>C NMR (125.8 MHz, CDCl<sub>3</sub>) Spectrum of *N*-Cyclohexyl-3-phenylbutanamide

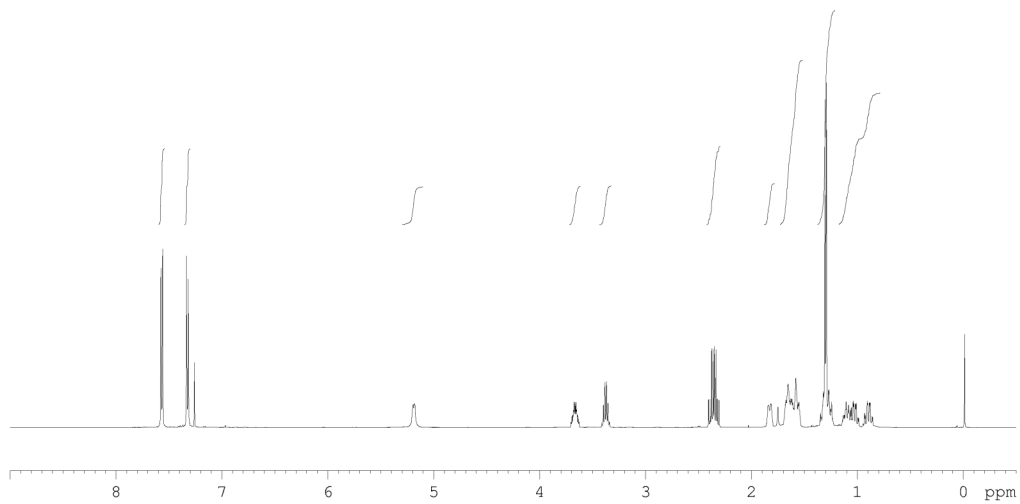

$^1\text{H}$  NMR (500 MHz,  $\text{CDCl}_3$ ) Spectrum of 3-(4-Cyanophenyl)-*N*-cyclohexylbutanamide

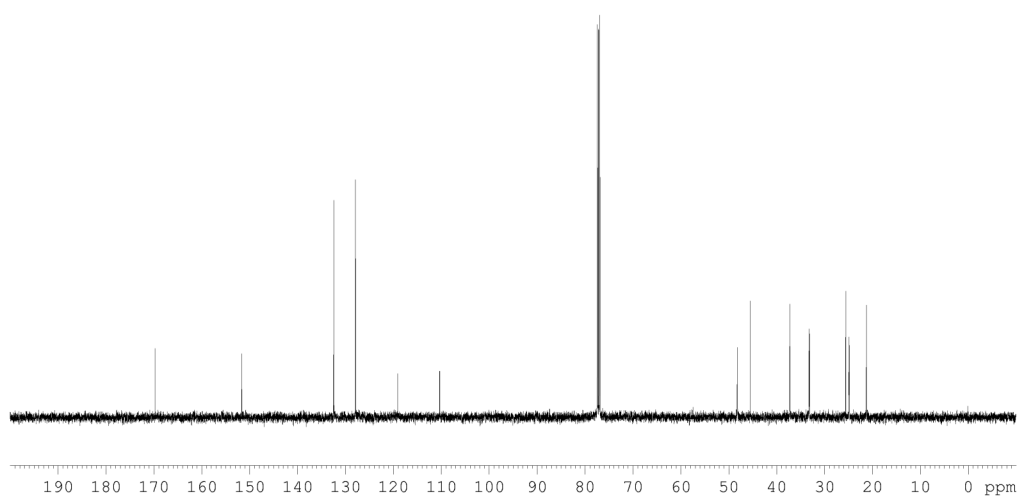

$^{13}\text{C}$  NMR (125.8 MHz,  $\text{CDCl}_3$ ) Spectrum of 3-(4-Cyanophenyl)-*N*-cyclohexylbutanamide

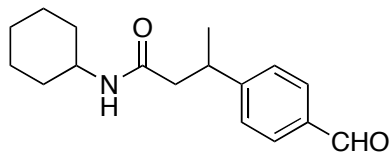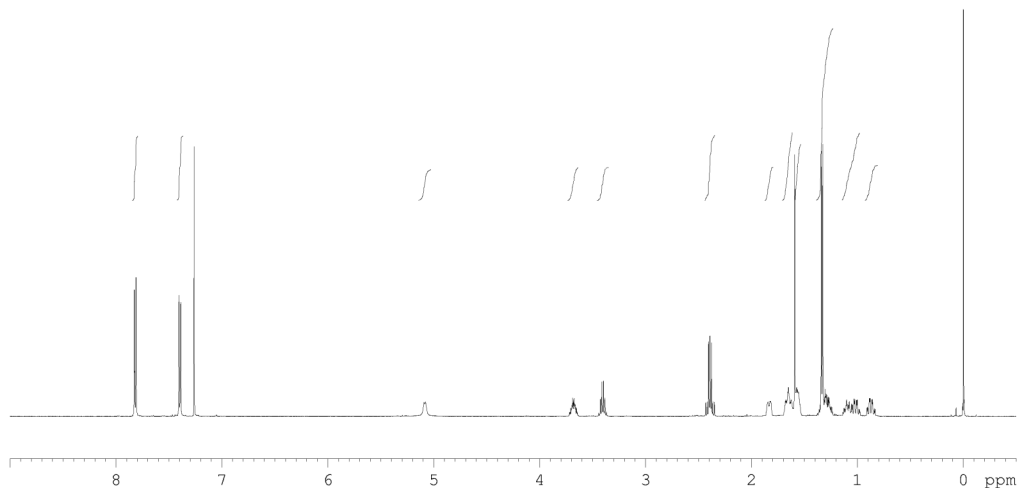

<sup>1</sup>H NMR (500 MHz, CDCl<sub>3</sub>) Spectrum of *N*-Cyclohexyl-3-(4-formylphenyl)butanamide

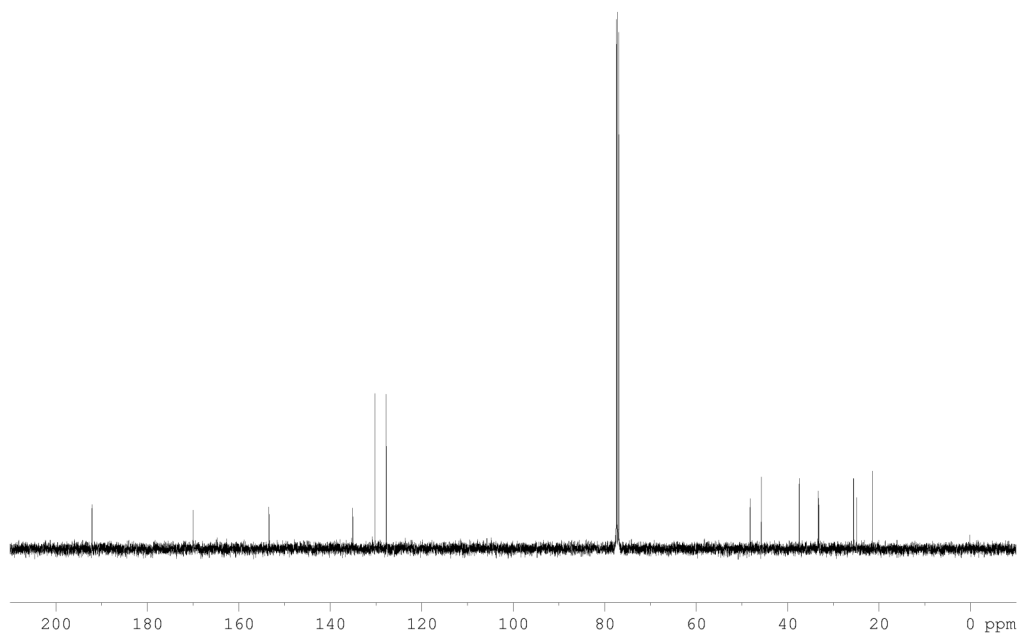

<sup>13</sup>C NMR (125.8 MHz, CDCl<sub>3</sub>) Spectrum of *N*-Cyclohexyl-3-(4-formylphenyl)butanamide

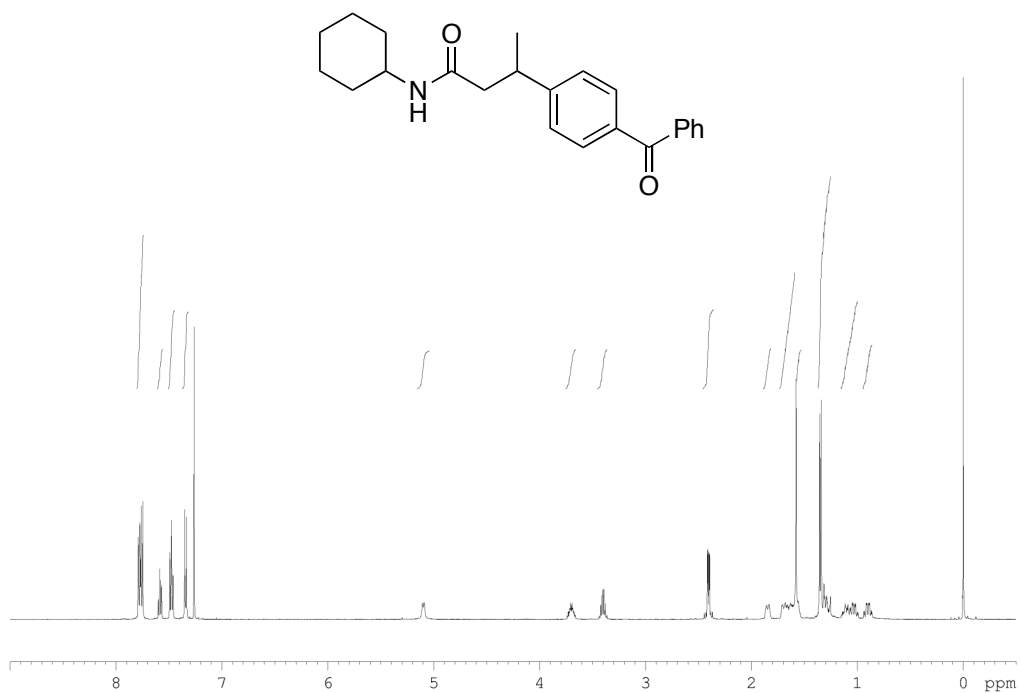

<sup>1</sup>H NMR (500 MHz, CDCl<sub>3</sub>) Spectrum of 3-(4-Benzoylphenyl)-*N*-cyclohexylbutanamide

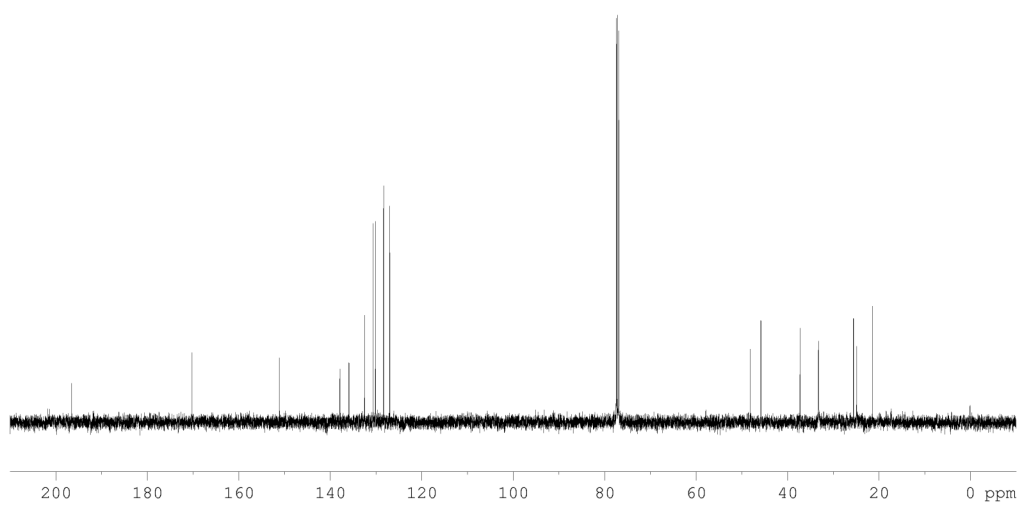

<sup>13</sup>C NMR (125.8 MHz, CDCl<sub>3</sub>) Spectrum of 3-(4-Benzoylphenyl)-*N*-cyclohexylbutanamide

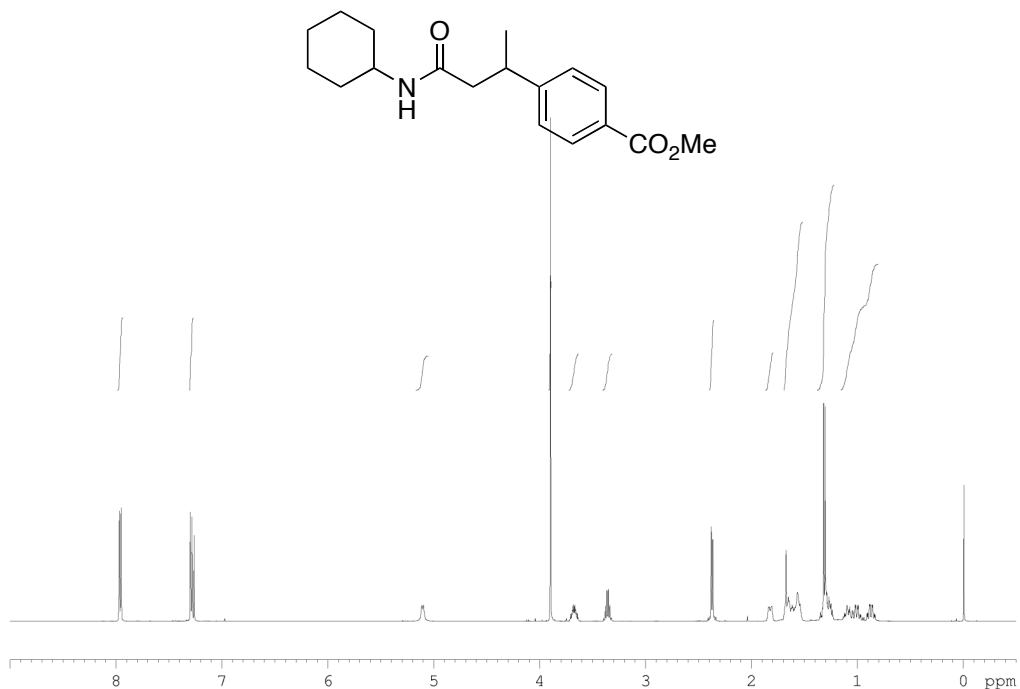

<sup>1</sup>H NMR (500 MHz, CDCl<sub>3</sub>) Spectrum of Methyl 4-(4-(Cyclohexylamino)-4-oxobutan-2-yl)benzoate

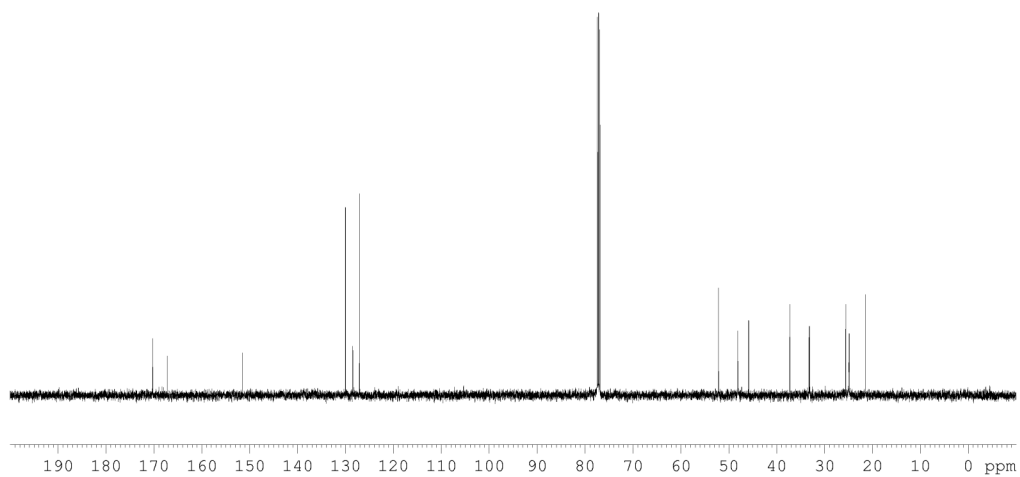

<sup>13</sup>C NMR (125.8 MHz, CDCl<sub>3</sub>) Spectrum of Methyl 4-(4-(Cyclohexylamino)-4-oxobutan-2-yl)benzoate

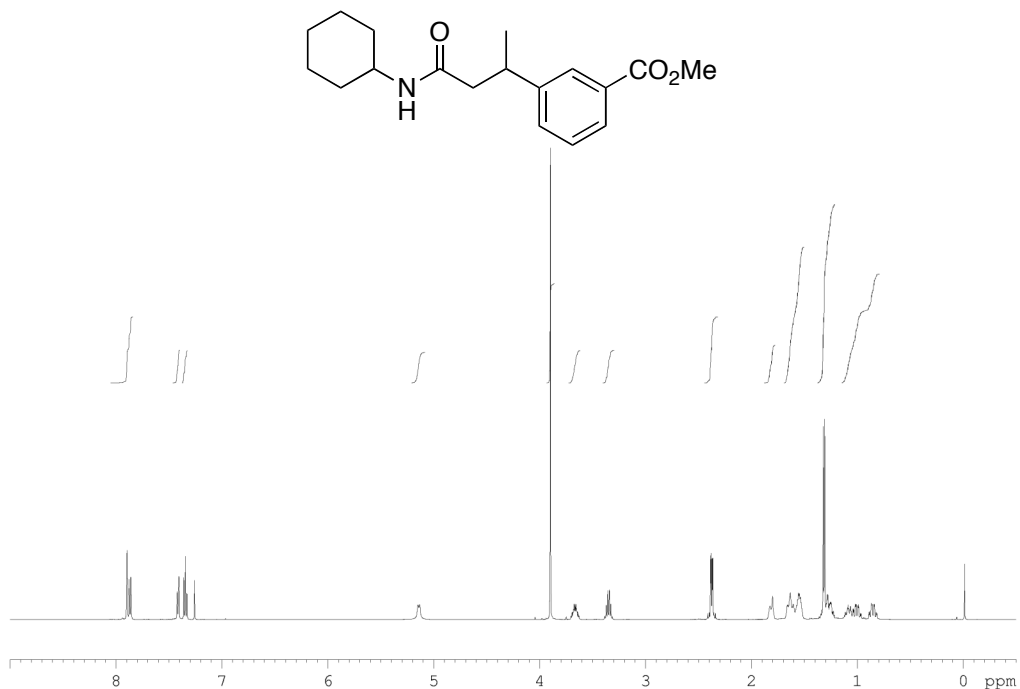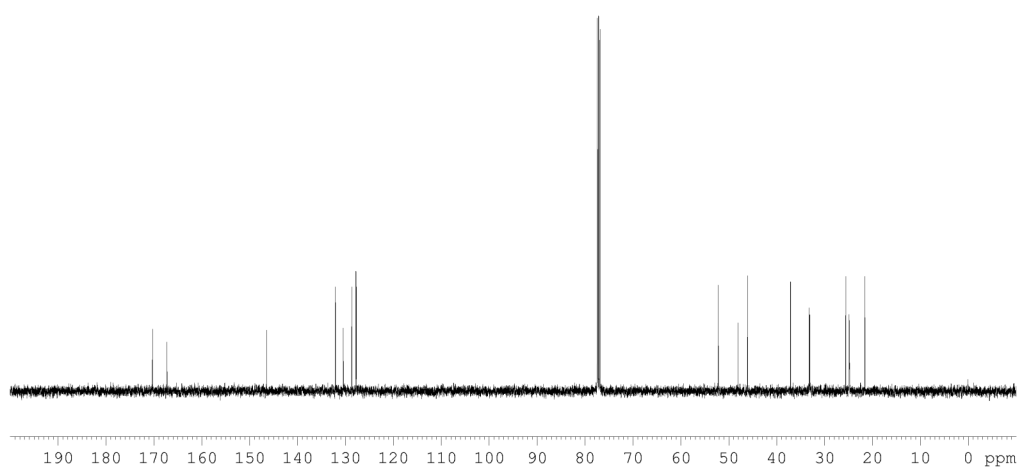



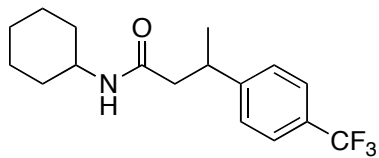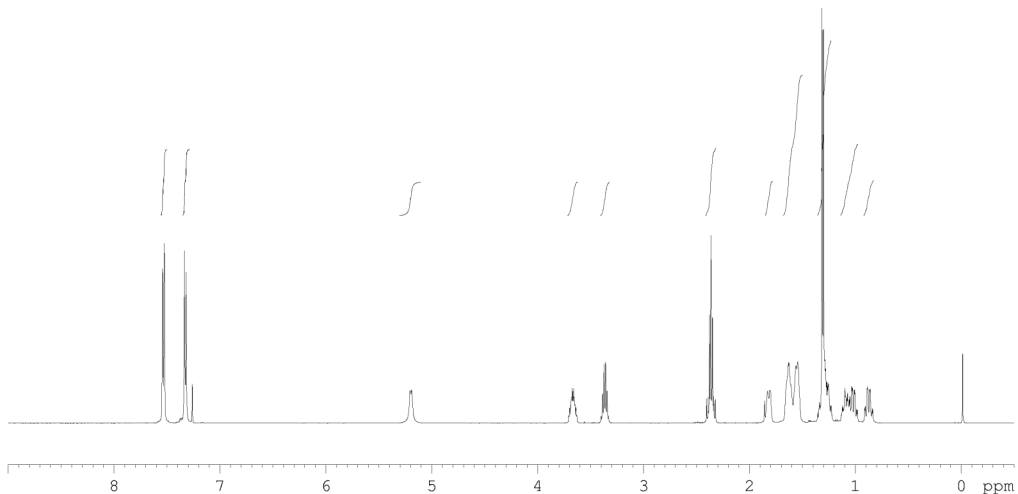

<sup>1</sup>H NMR (500 MHz, CDCl<sub>3</sub>) Spectrum of *N*-Cyclohexyl-3-(4-(trifluoromethyl)phenyl)butanamide

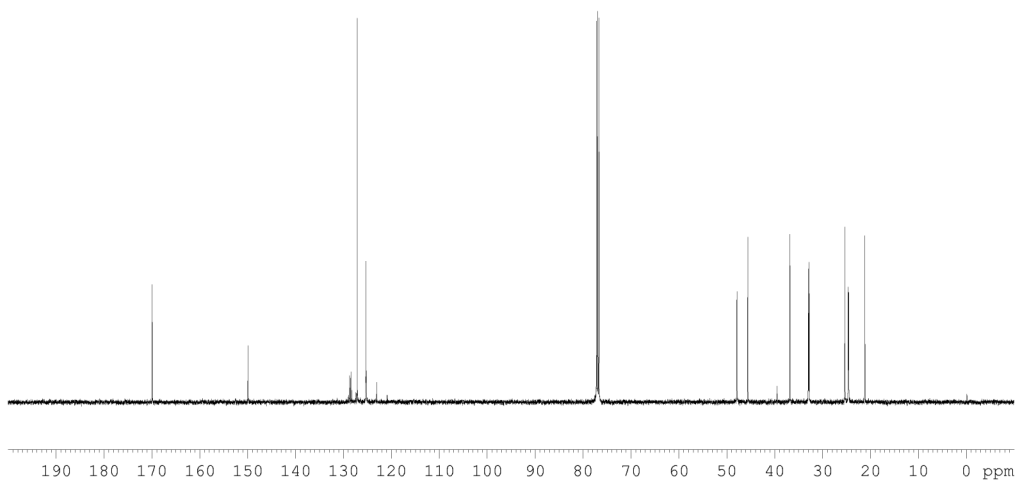

<sup>13</sup>C NMR (125.8 MHz, CDCl<sub>3</sub>) Spectrum of *N*-Cyclohexyl-3-(4-(trifluoromethyl)phenyl)butanamide

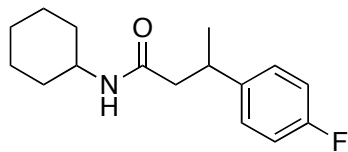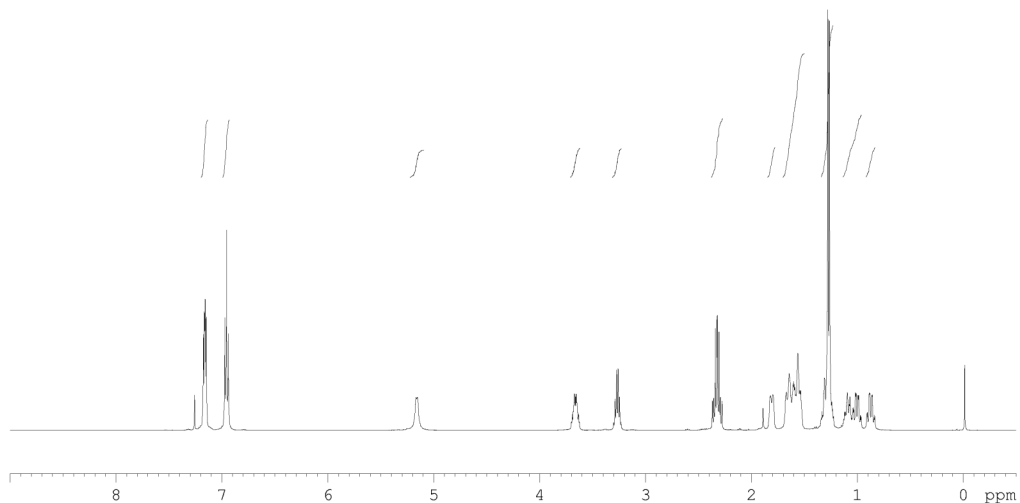

$^1\text{H}$  NMR (500 MHz,  $\text{CDCl}_3$ ) Spectrum of *N*-Cyclohexyl-3-(4-fluorophenyl)butanamide

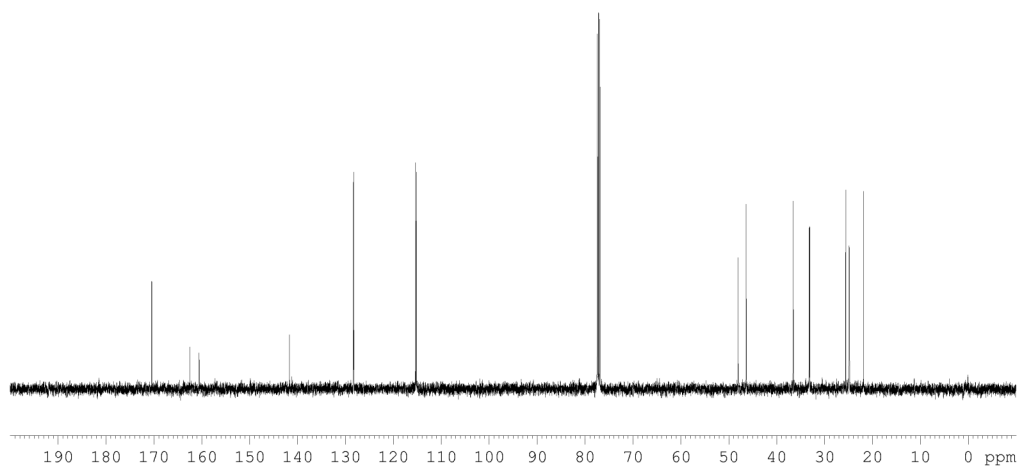

$^{13}\text{C}$  NMR (125.8 MHz,  $\text{CDCl}_3$ ) Spectrum of *N*-Cyclohexyl-3-(4-fluorophenyl)butanamide

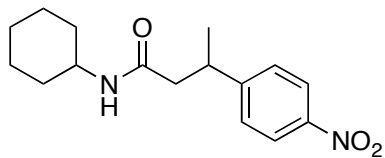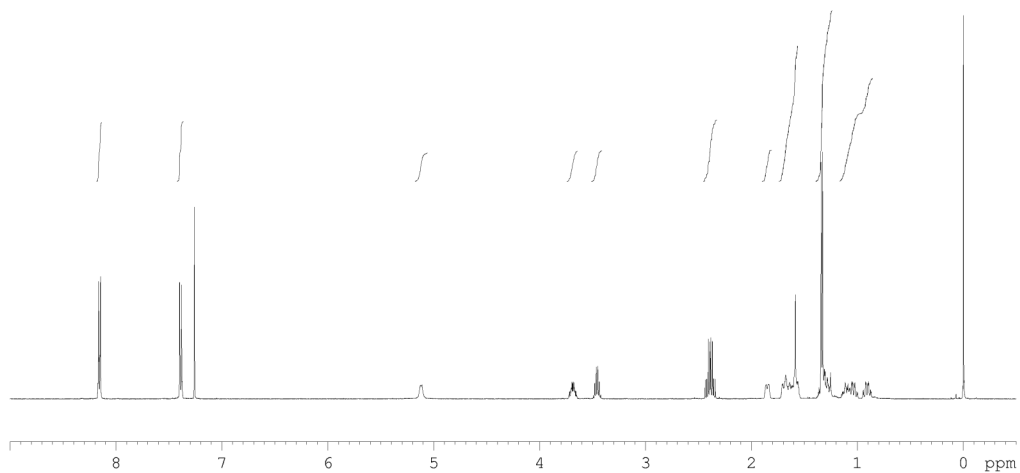

<sup>1</sup>H NMR (500 MHz, CDCl<sub>3</sub>) Spectrum of *N*-Cyclohexyl-3-(4-nitrophenyl)butanamide

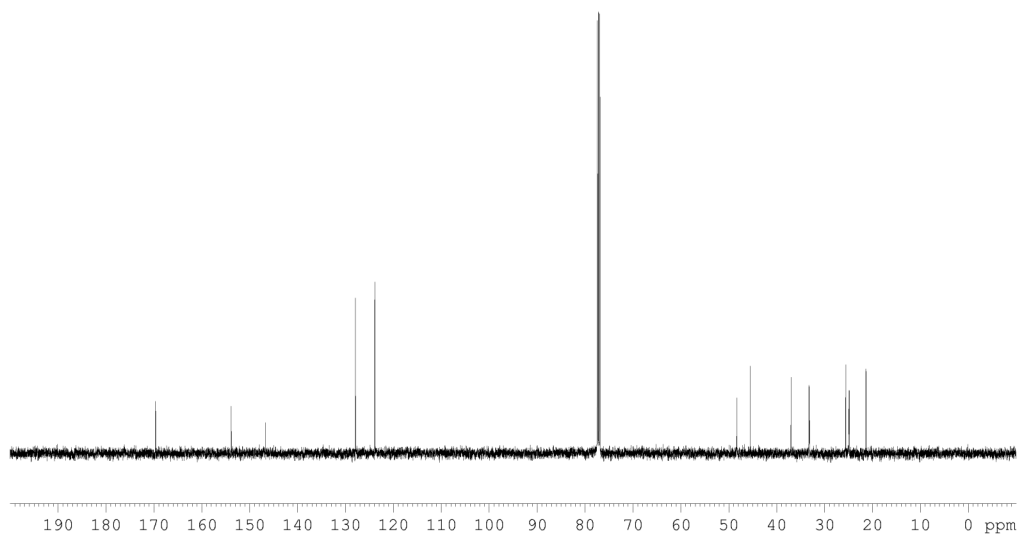

<sup>13</sup>C NMR (125.8 MHz, CDCl<sub>3</sub>) Spectrum of *N*-Cyclohexyl-3-(4-nitrophenyl)butanamide

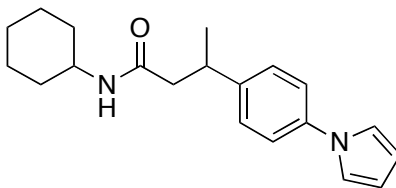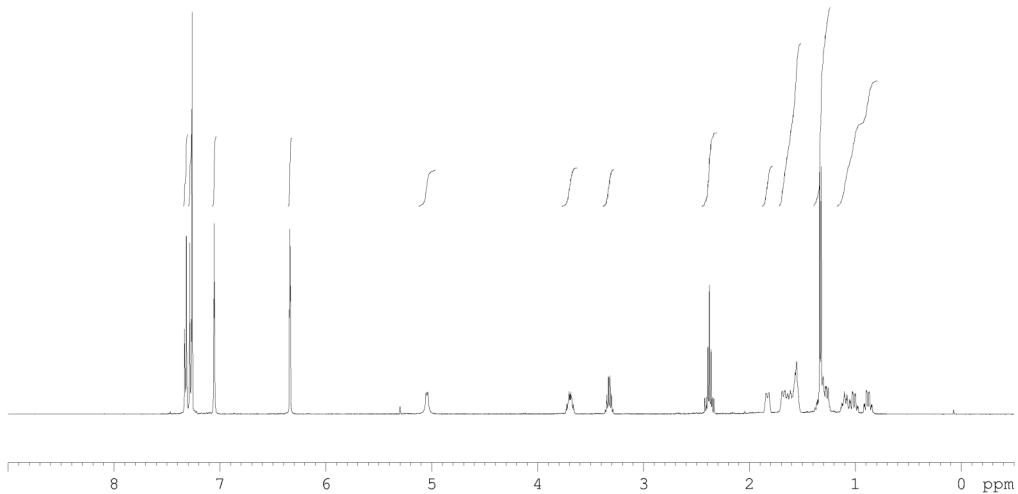

$^1\text{H}$  NMR (500 MHz,  $\text{CDCl}_3$ ) Spectrum of 3-(4-(1*H*-Pyrrol-1-yl)phenyl)-*N*-cyclohexylbutanamide

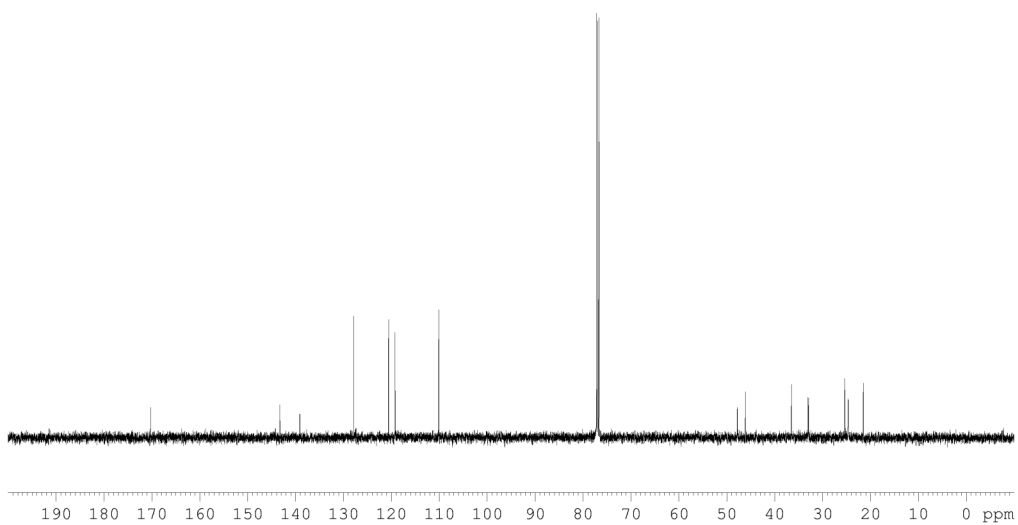

$^{13}\text{C}$  NMR (125.8 MHz,  $\text{CDCl}_3$ ) Spectrum of 3-(4-(1*H*-Pyrrol-1-yl)phenyl)-*N*-cyclohexylbutanamide

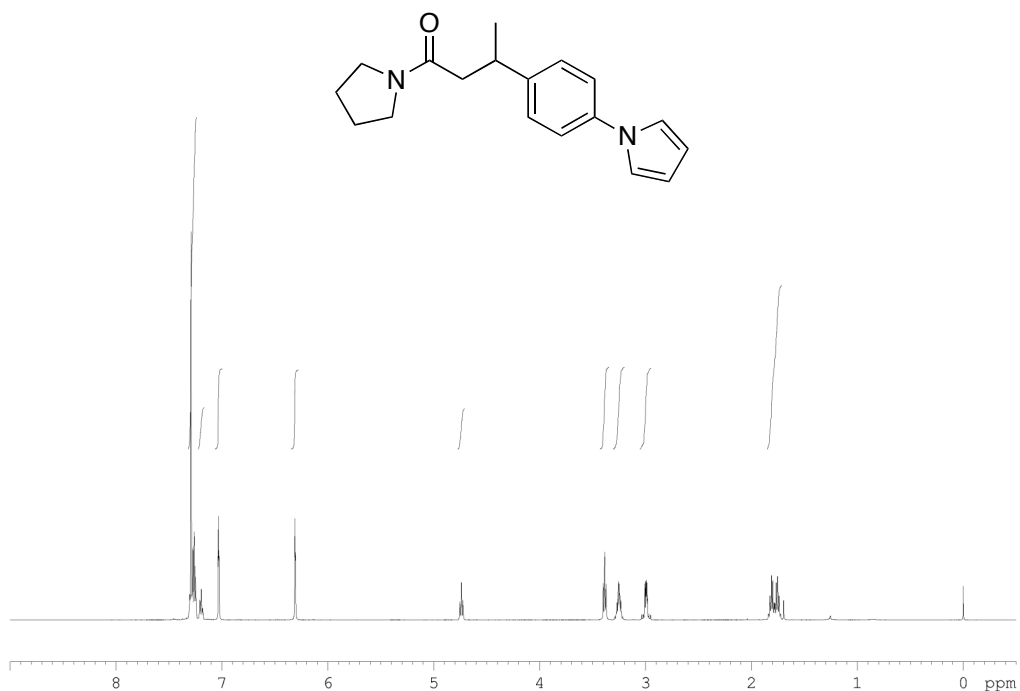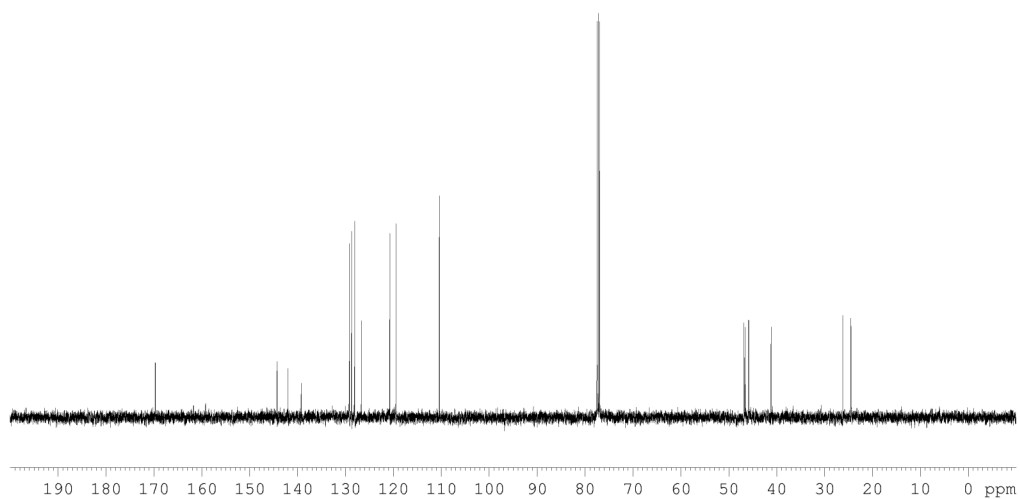

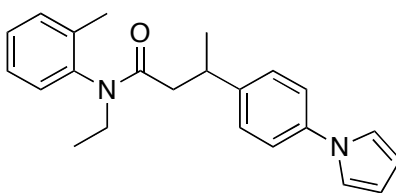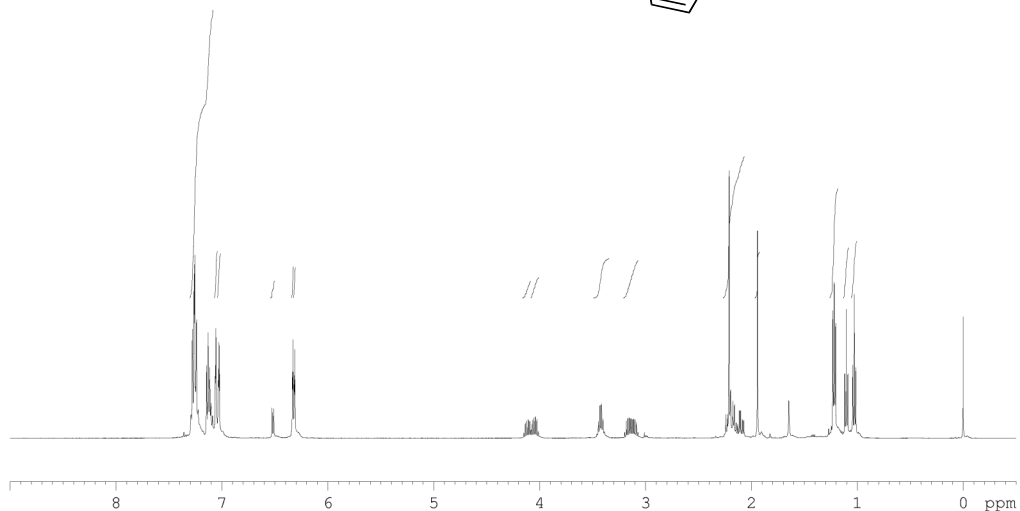

$^1\text{H}$  NMR (500 MHz,  $\text{CDCl}_3$ ) Spectrum of 3-(4-(1*H*-Pyrrol-1-yl)phenyl)-*N*-ethyl-*N*-(*o*-tolyl)butanamide

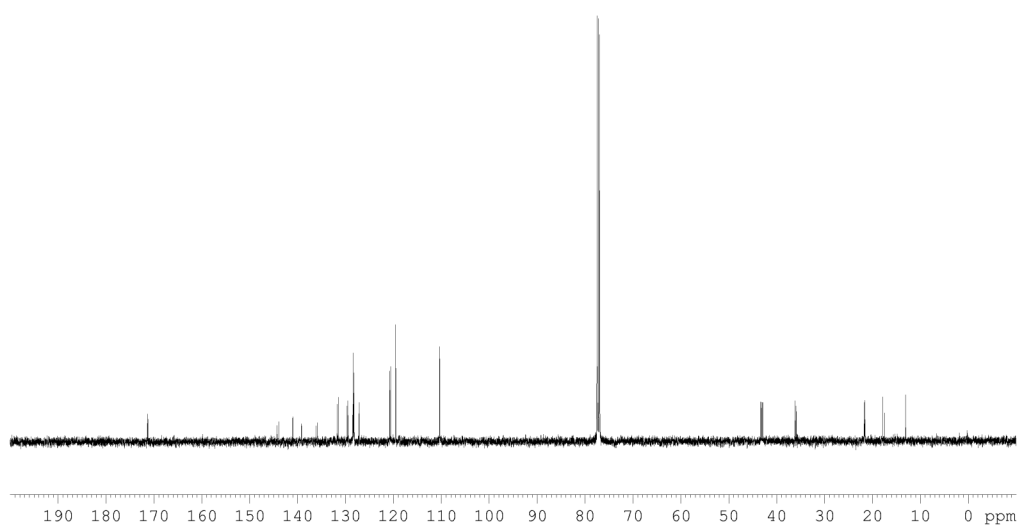

$^{13}\text{C}$  NMR (125.8 MHz,  $\text{CDCl}_3$ ) Spectrum of 3-(4-(1*H*-Pyrrol-1-yl)phenyl)-*N*-ethyl-*N*-(*o*-tolyl)butanamide

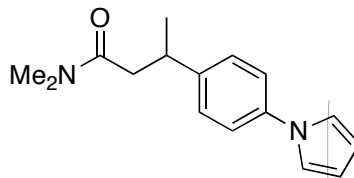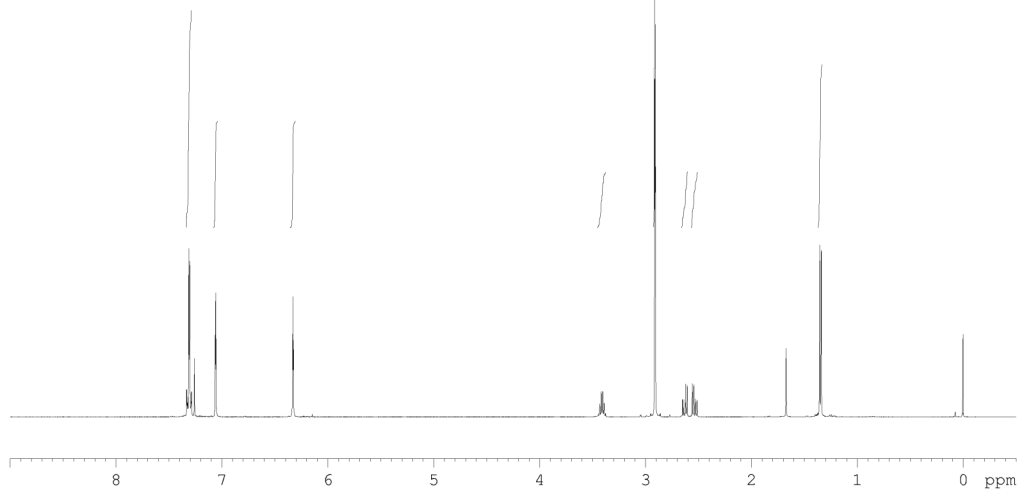

$^1\text{H}$  NMR (500 MHz,  $\text{CDCl}_3$ ) Spectrum of 3-(4-(1*H*-Pyrrol-1-yl)phenyl)-*N,N*-dimethylbutanamide

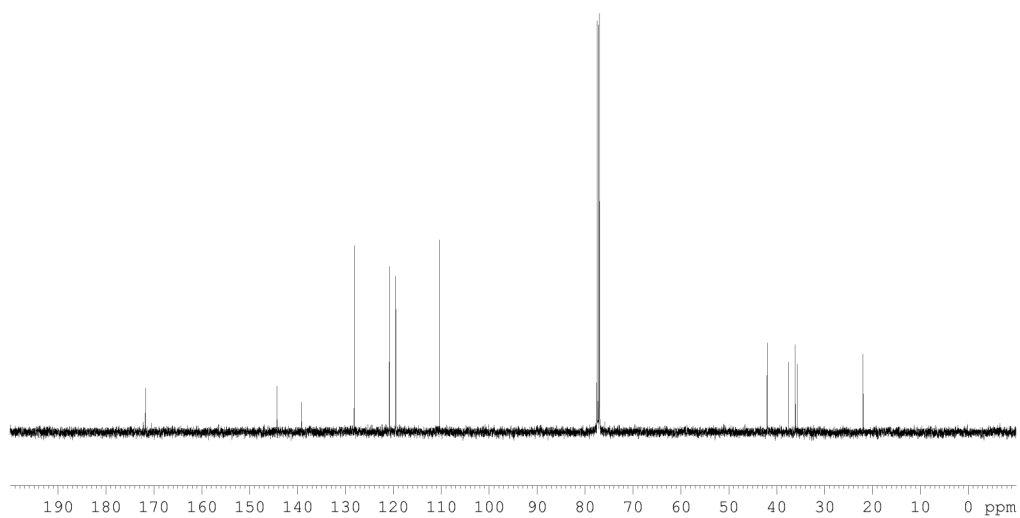

$^{13}\text{C}$  NMR (125.8 MHz,  $\text{CDCl}_3$ ) Spectrum of 3-(4-(1*H*-Pyrrol-1-yl)phenyl)-*N,N*-dimethylbutanamide

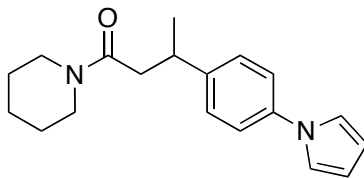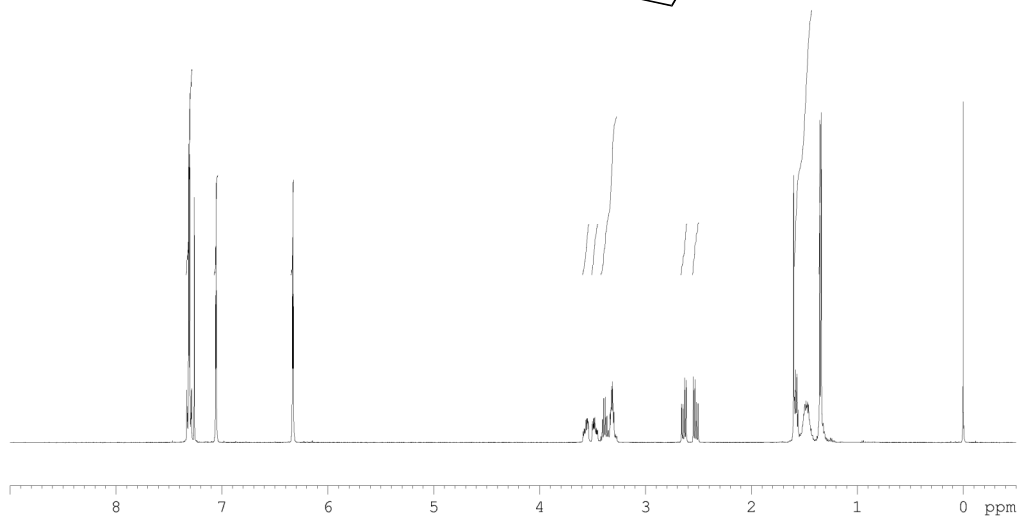

$^1\text{H}$  NMR (500 MHz,  $\text{CDCl}_3$ ) Spectrum of 3-(4-(1*H*-Pyrrol-1-yl)phenyl)-1-(piperidin-1-yl)butan-1-one

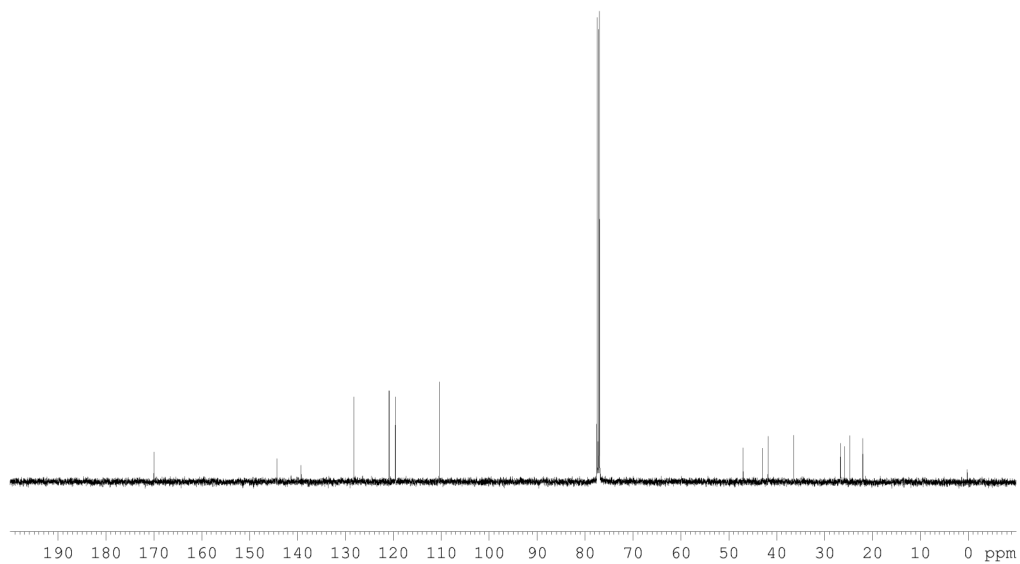

$^{13}\text{C}$  NMR (125.8 MHz,  $\text{CDCl}_3$ ) Spectrum of 3-(4-(1*H*-Pyrrol-1-yl)phenyl)-1-(piperidin-1-yl)butan-1-one



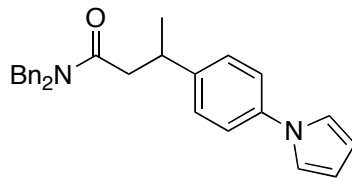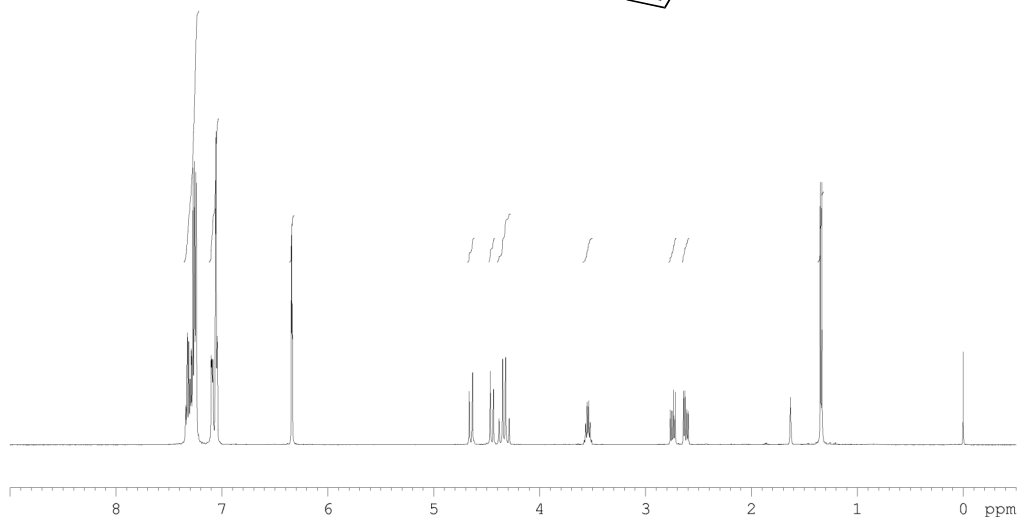

$^1\text{H}$  NMR (500 MHz,  $\text{CDCl}_3$ ) Spectrum of 3-(4-(1*H*-Pyrrol-1-yl)phenyl)-*N,N*-dibenzylbutanamide

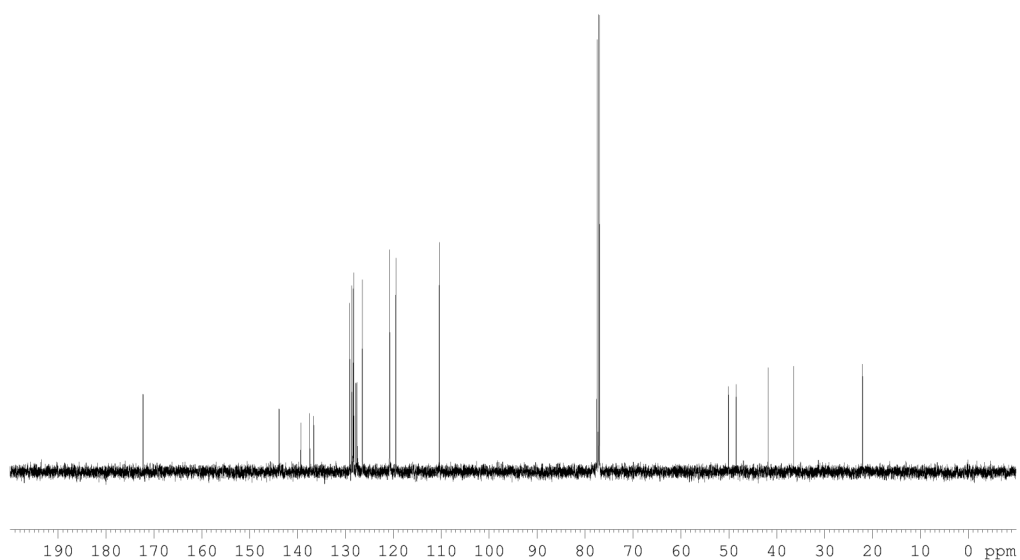

$^{13}\text{C}$  NMR (125.8 MHz,  $\text{CDCl}_3$ ) Spectrum of 3-(4-(1*H*-Pyrrol-1-yl)phenyl)-*N,N*-dibenzylbutanamide

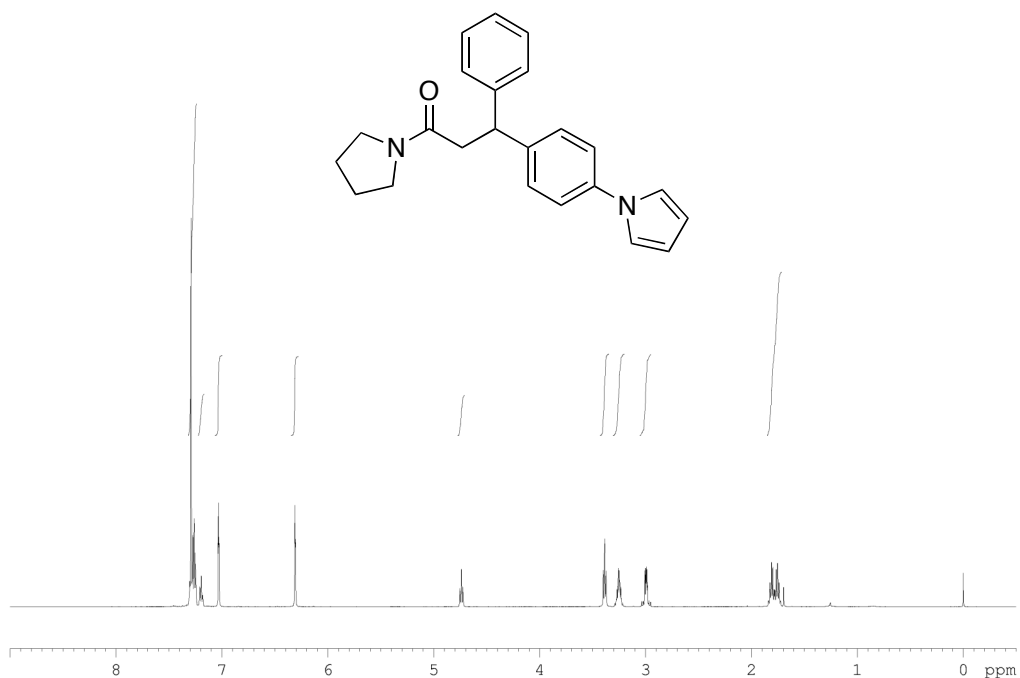

<sup>1</sup>H NMR (500 MHz, CDCl<sub>3</sub>) Spectrum of 3-(4-(1*H*-Pyrrol-1-yl)phenyl)-3-phenyl-1-(pyrrolidin-1-yl)propan-1-one



<sup>13</sup>C NMR (125.8 MHz, CDCl<sub>3</sub>) Spectrum of 3-(4-(1*H*-Pyrrol-1-yl)phenyl)-3-phenyl-1-(pyrrolidin-1-yl)propan-1-one

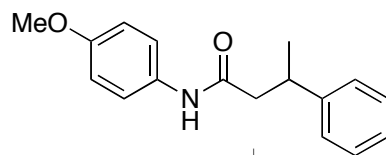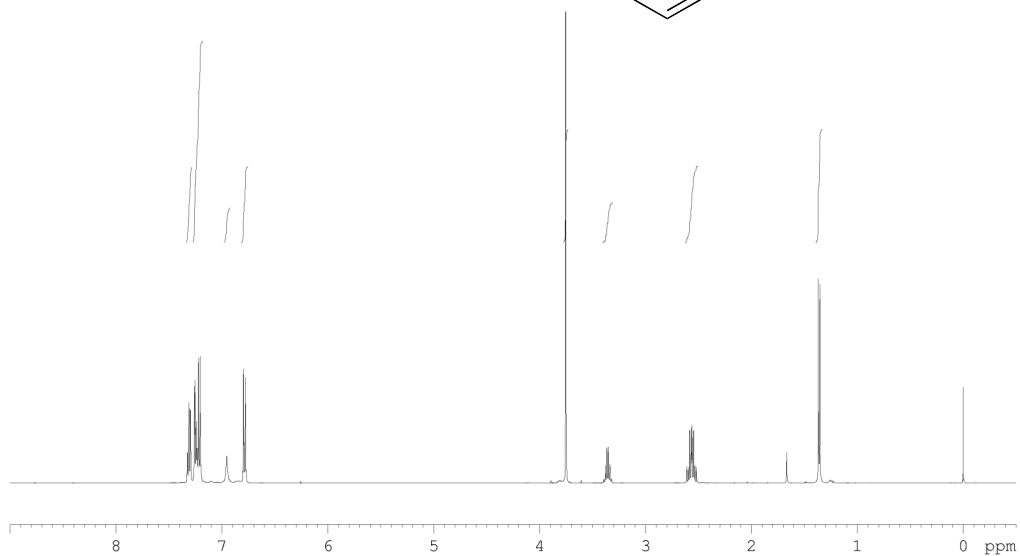

<sup>1</sup>H NMR (500 MHz, CDCl<sub>3</sub>) Spectrum of *N*-(4-Methoxyphenyl)-3-phenylbutanamide

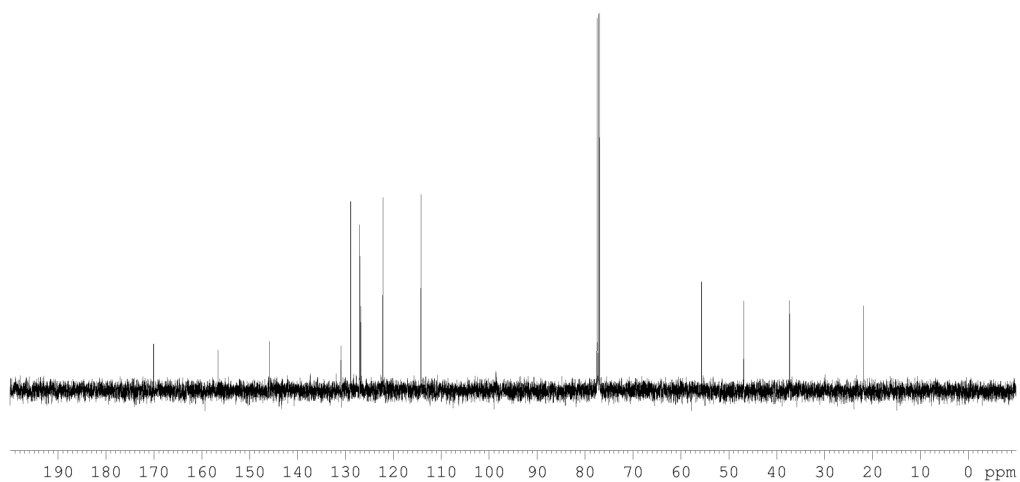

<sup>13</sup>C NMR (125.8 MHz, CDCl<sub>3</sub>) Spectrum of *N*-(4-Methoxyphenyl)-3-phenylbutanamide
